# Supplementary material for: Copper-catalyzed N-arylation and aerobic oxidation: one-pot synthesis of tetrahydroisoquinolino[2,1-a]quinazolinone derivatives
Source: Royal Society of Chemistry journal article supplement (doi:10.1039/c3ra44975k), 2013-11-11

## Supporting Information

### **Copper-catalyzed N-arylation and aerobic oxidation: one-pot synthesis of tetrahydroisoquinolino[2,1-*a*]quinazolinone derivatives**

Hua Tian,<sup>*a,b*</sup> Hongwei Qiao,<sup>*c*</sup> Changjin Zhu<sup>*a*</sup> and Hua Fu<sup>*a,b\**</sup>

*a* Department of Applied Chemistry, Beijing Institute of Technology, Beijing 100081, People's Republic of China

*b* Key Laboratory of Bioorganic Phosphorus Chemistry and Chemical Biology (Ministry of Education), Department of Chemistry, Tsinghua University, Beijing 100084, People's Republic of China

*c* Department of Chemistry, College of Chemistry and Chemical Engineering, Xiamen University, Xiamen 361005, People's Republic of China

Fax: (+86) 10-62781695; E-mail: fuhua@mail.tsinghua.edu.cn

The  $^1\text{H}$  and  $^{13}\text{C}$  NMR spectra of compounds **3a-f'**, **4a**

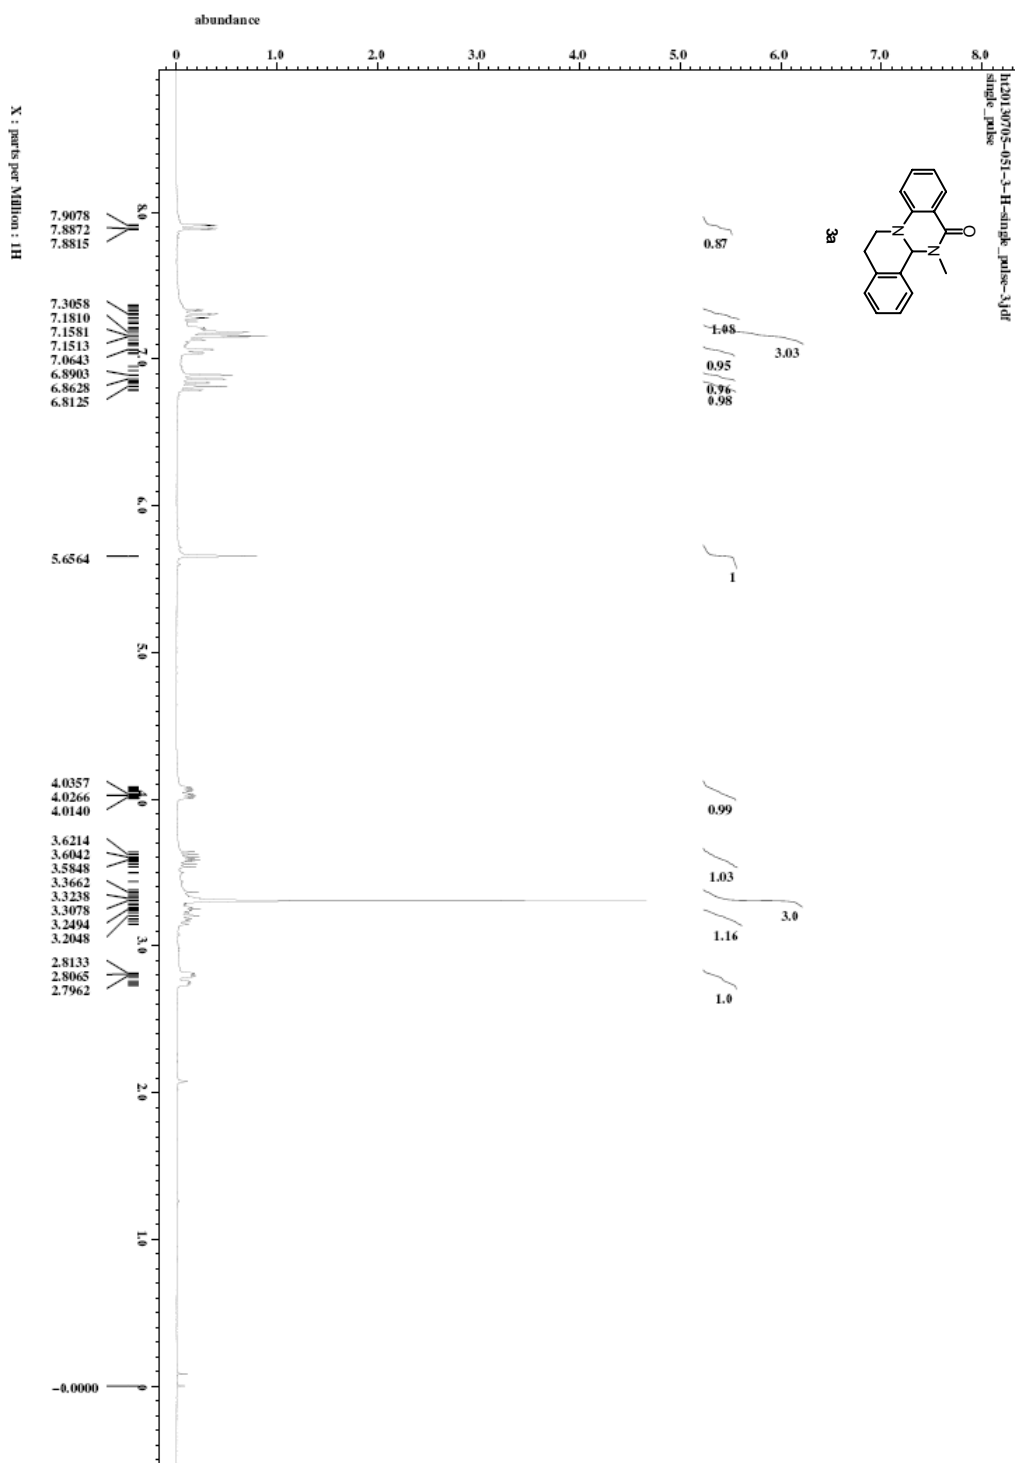

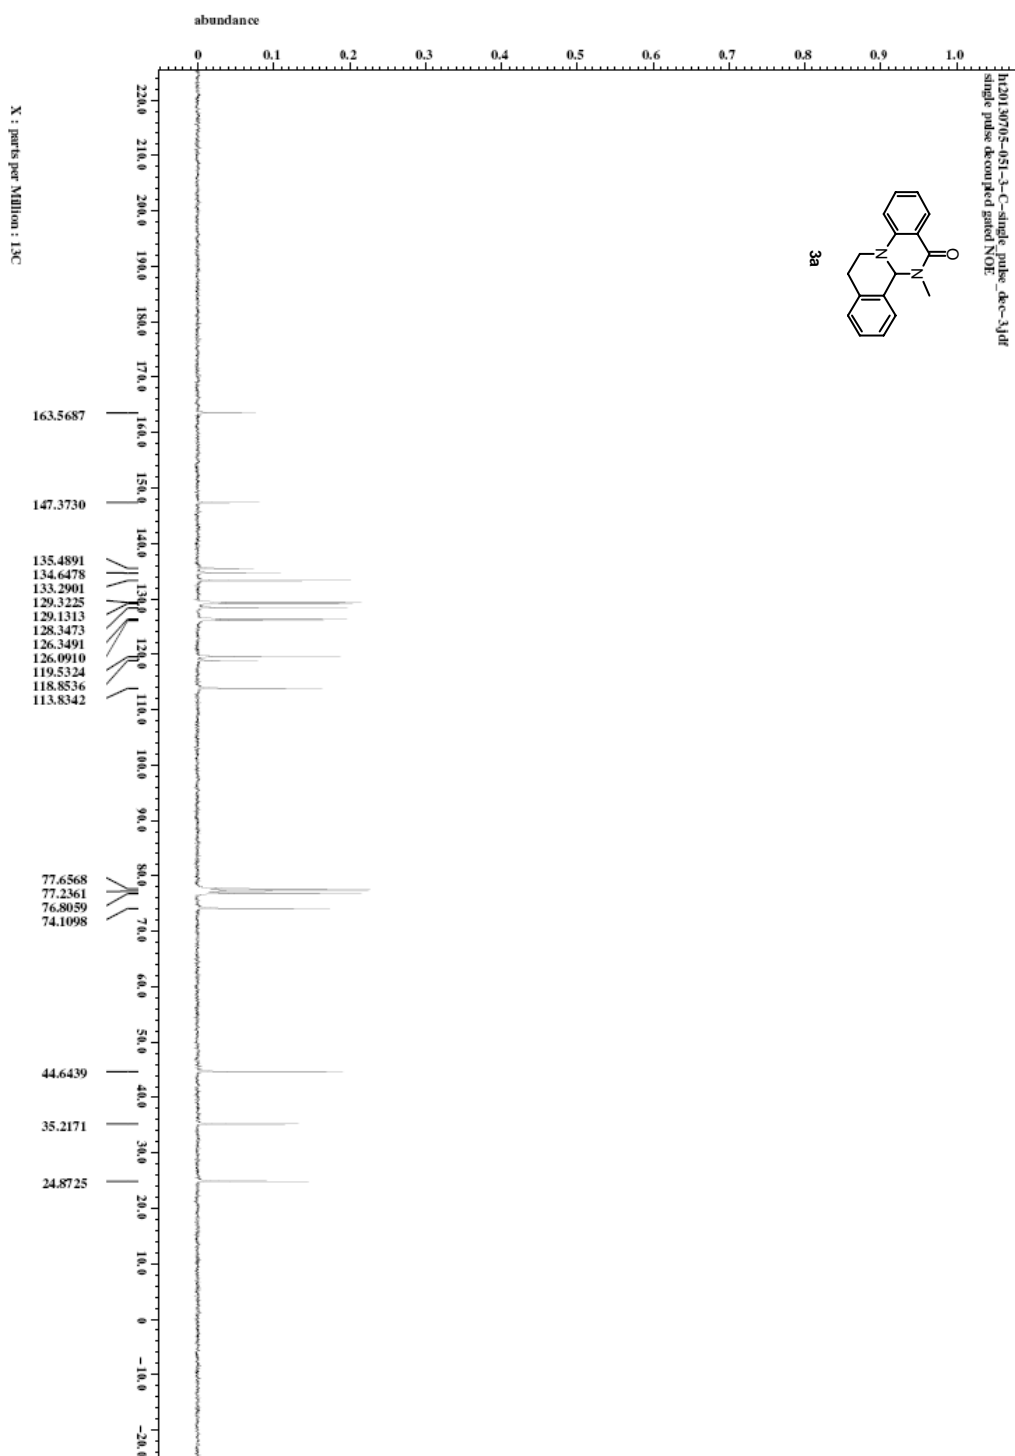

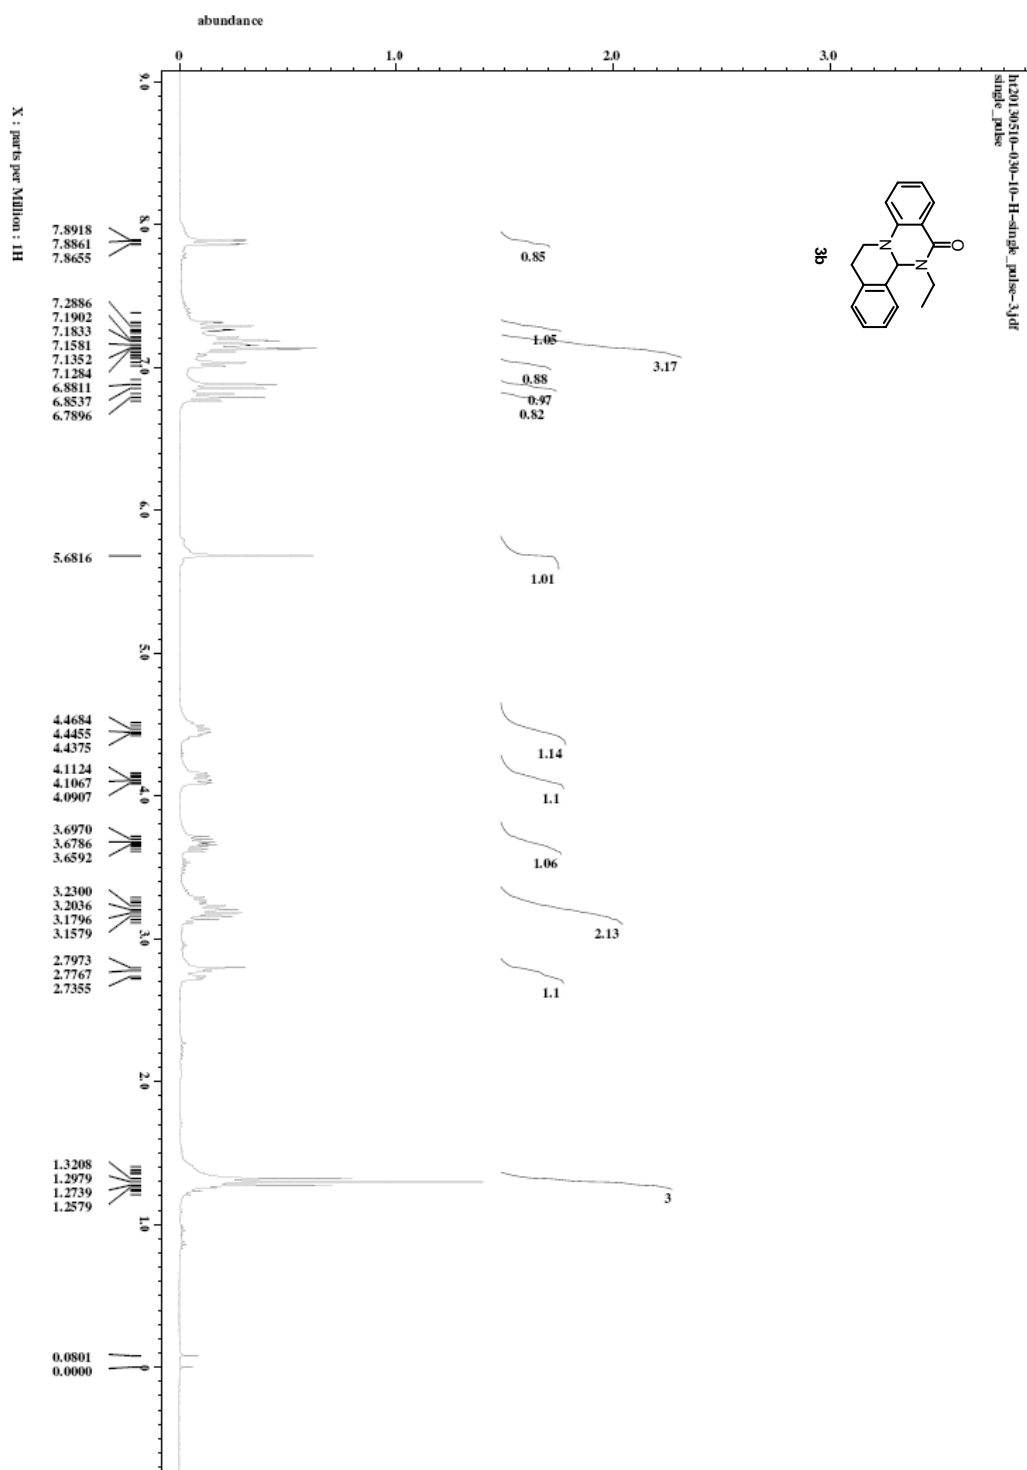

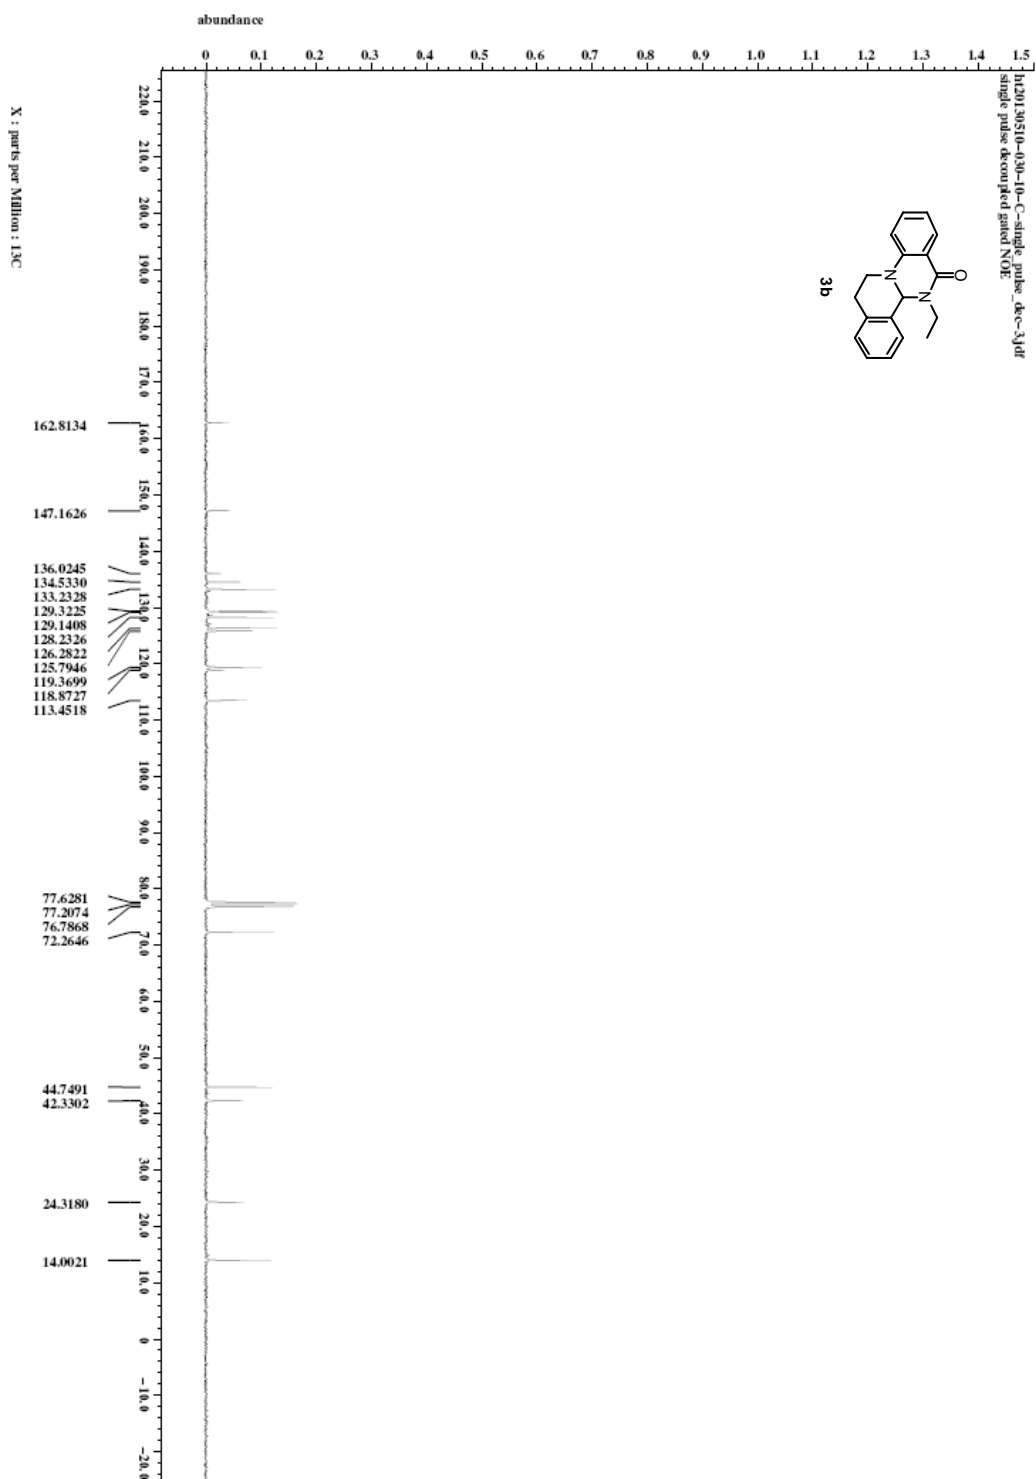

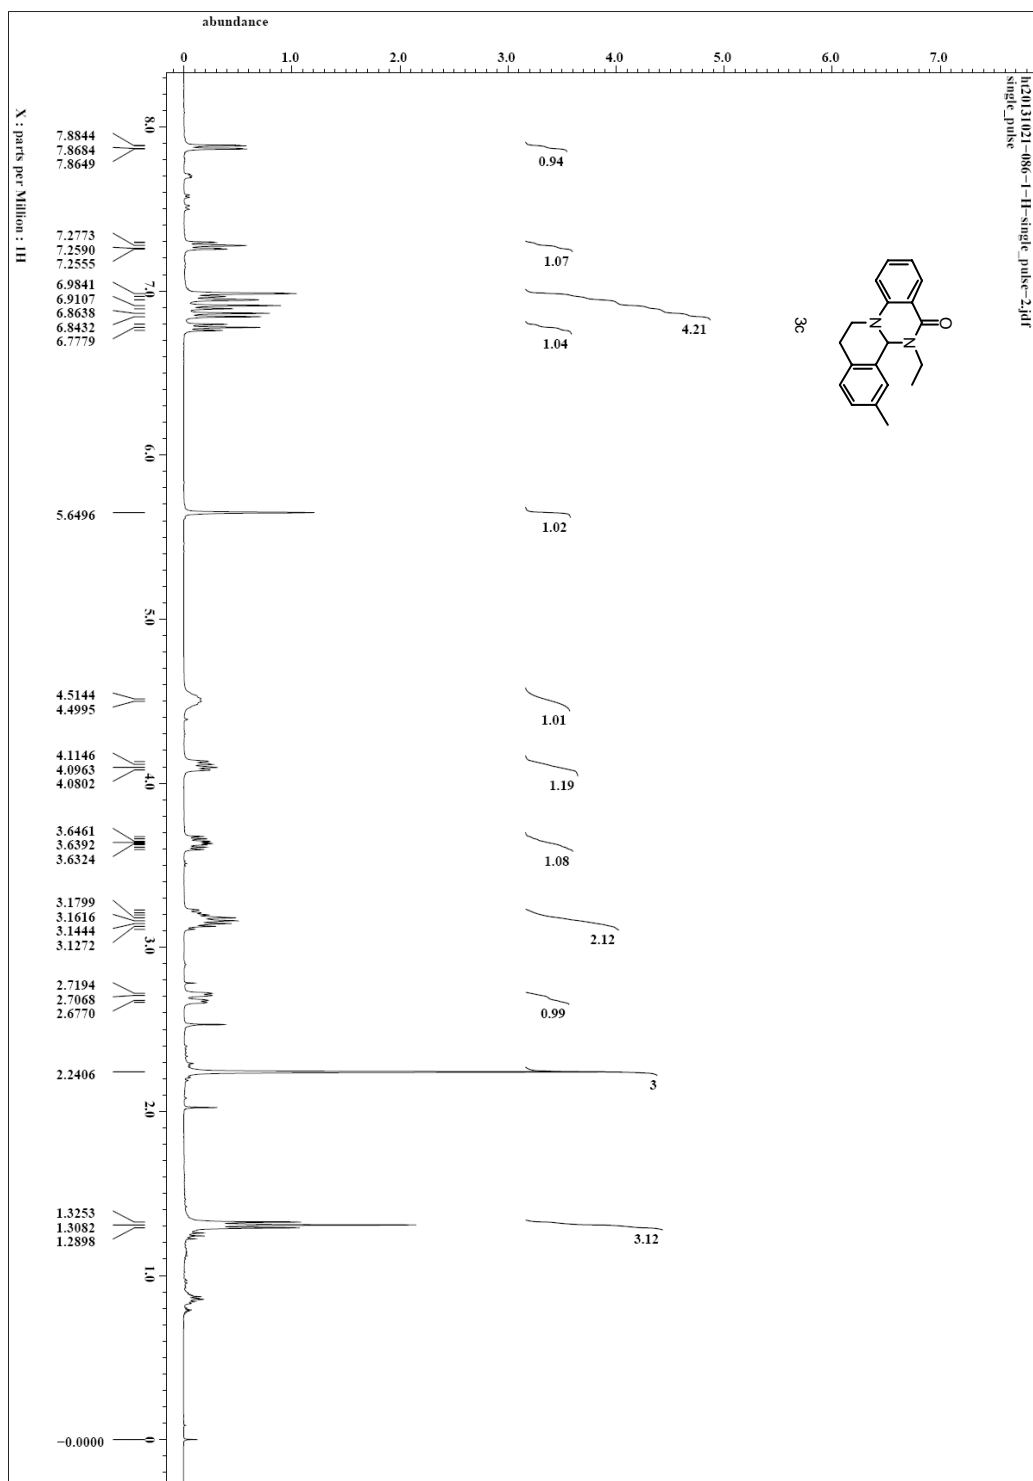

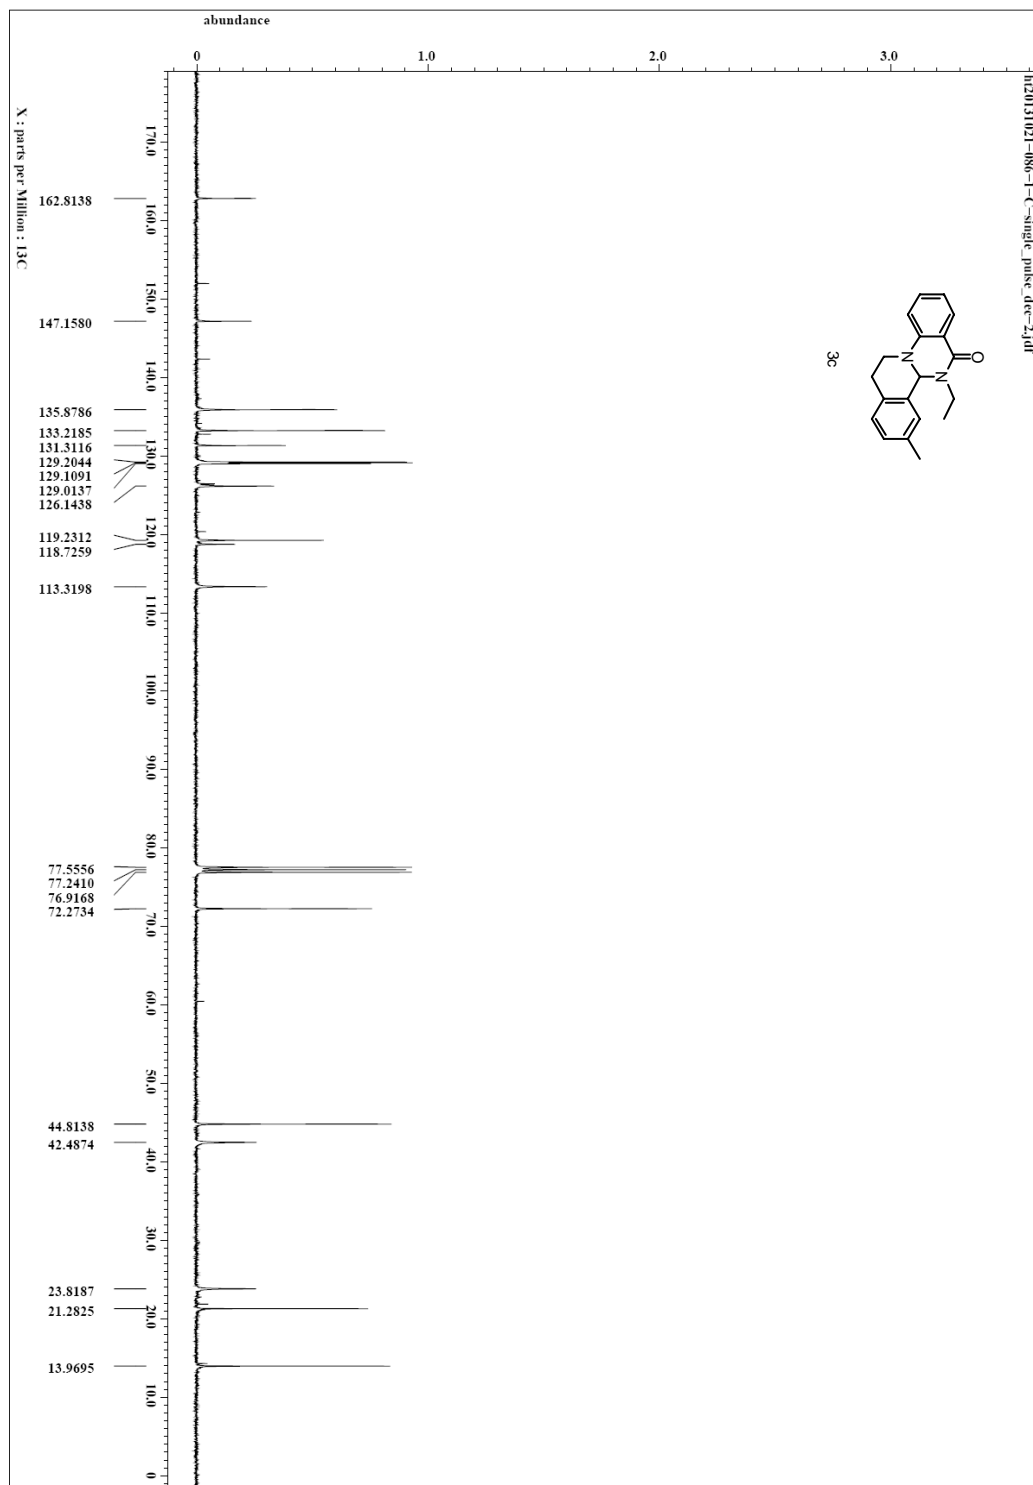

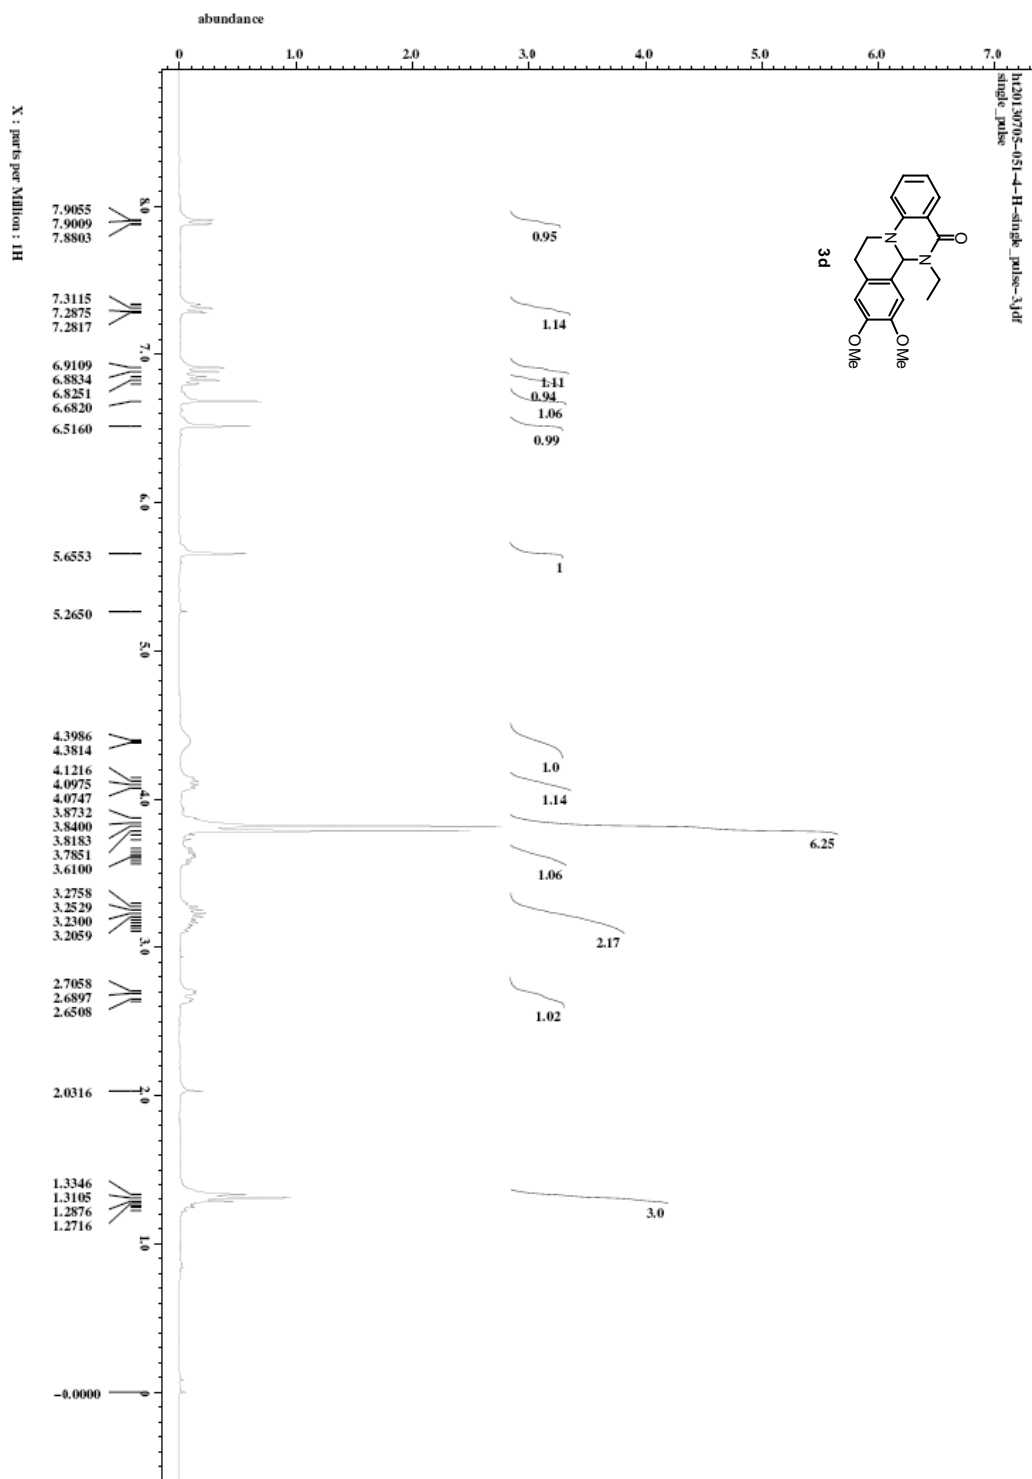



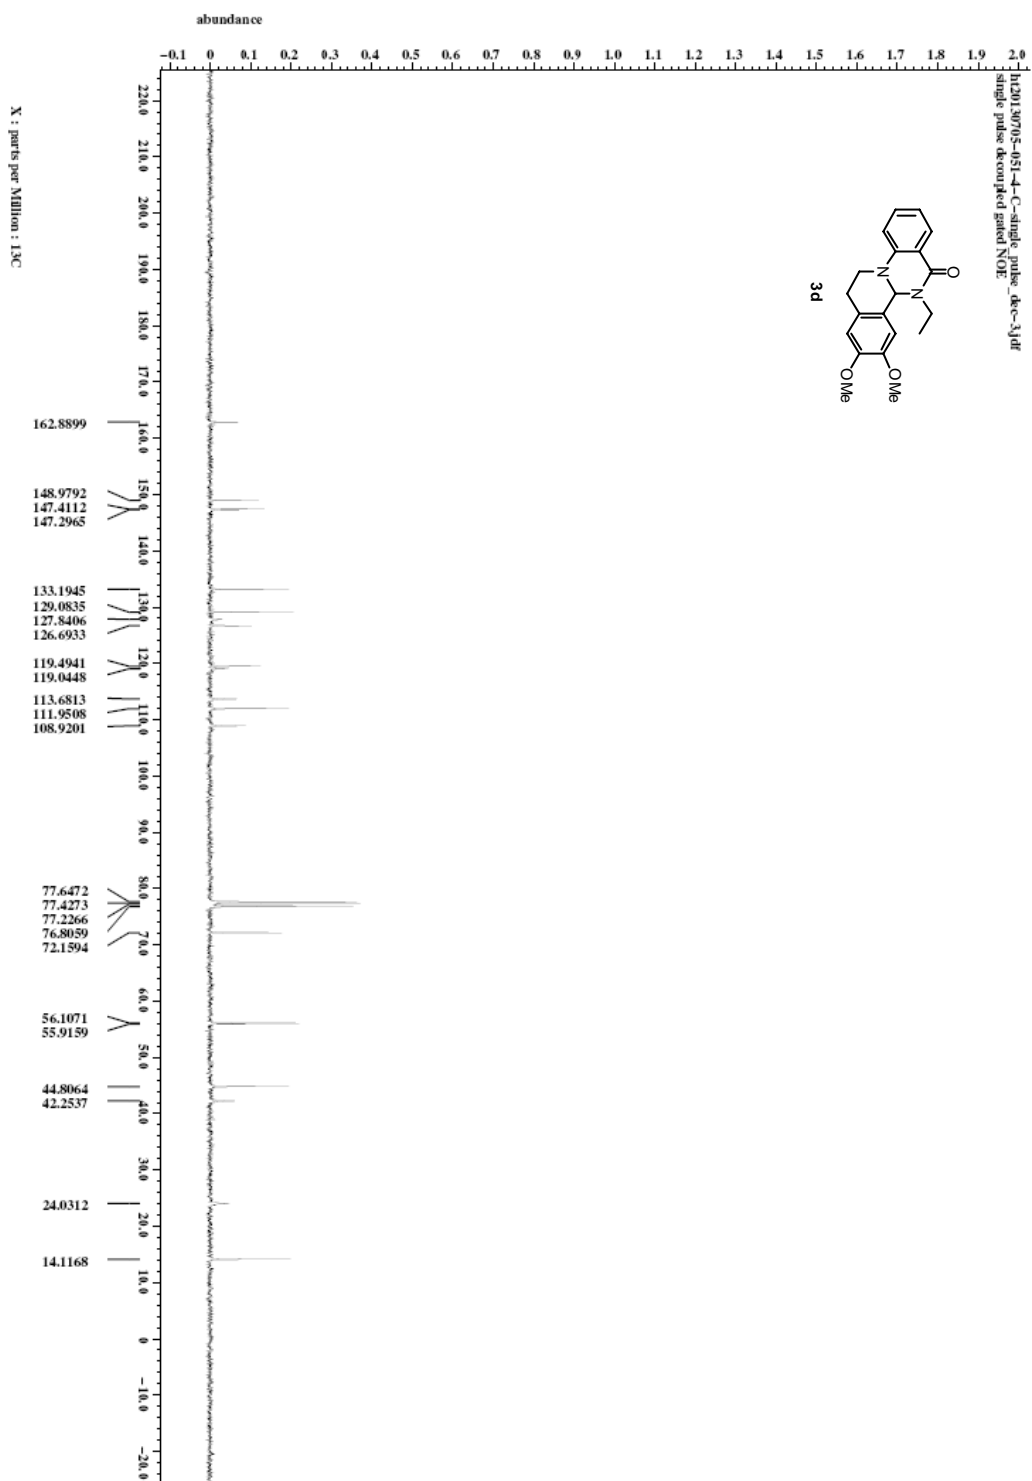

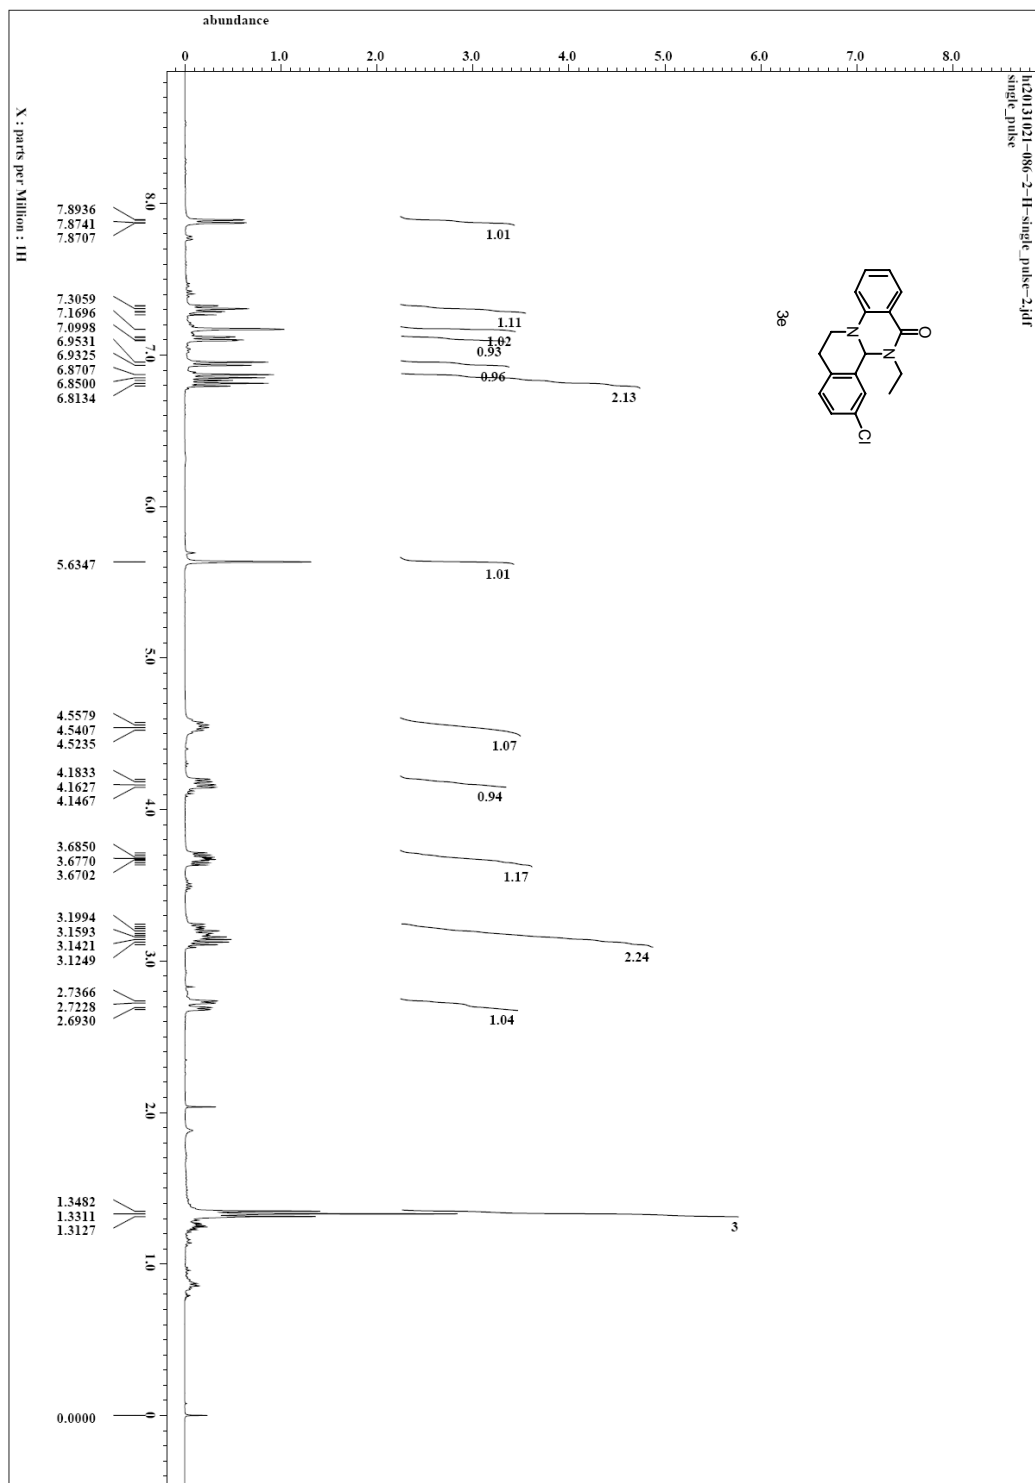

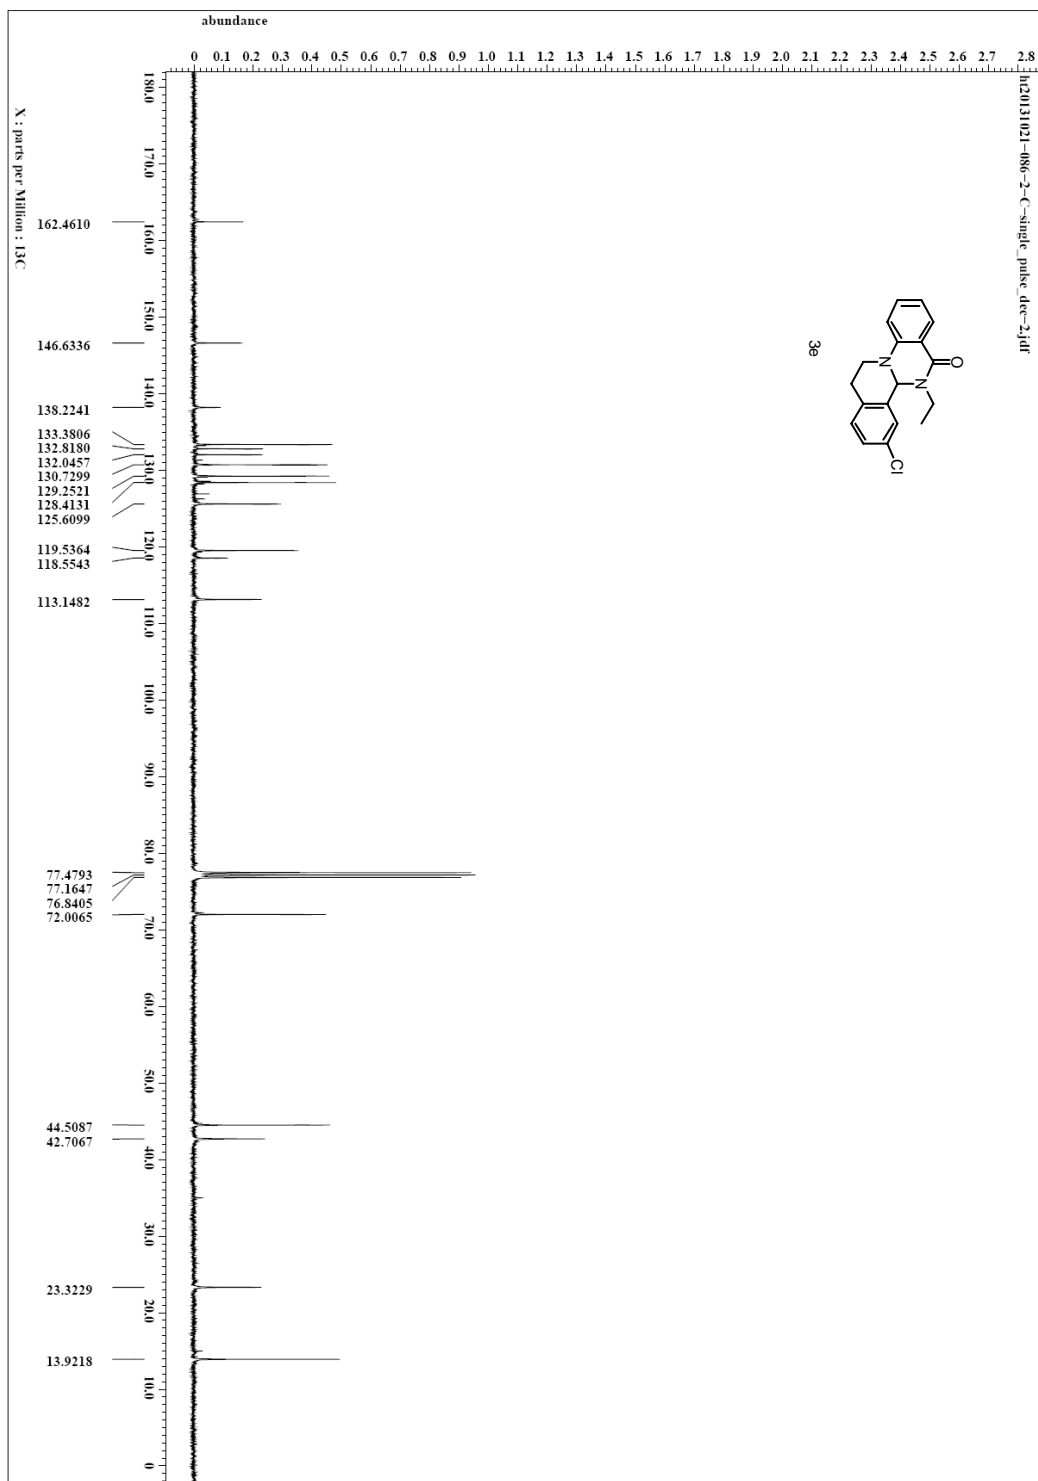

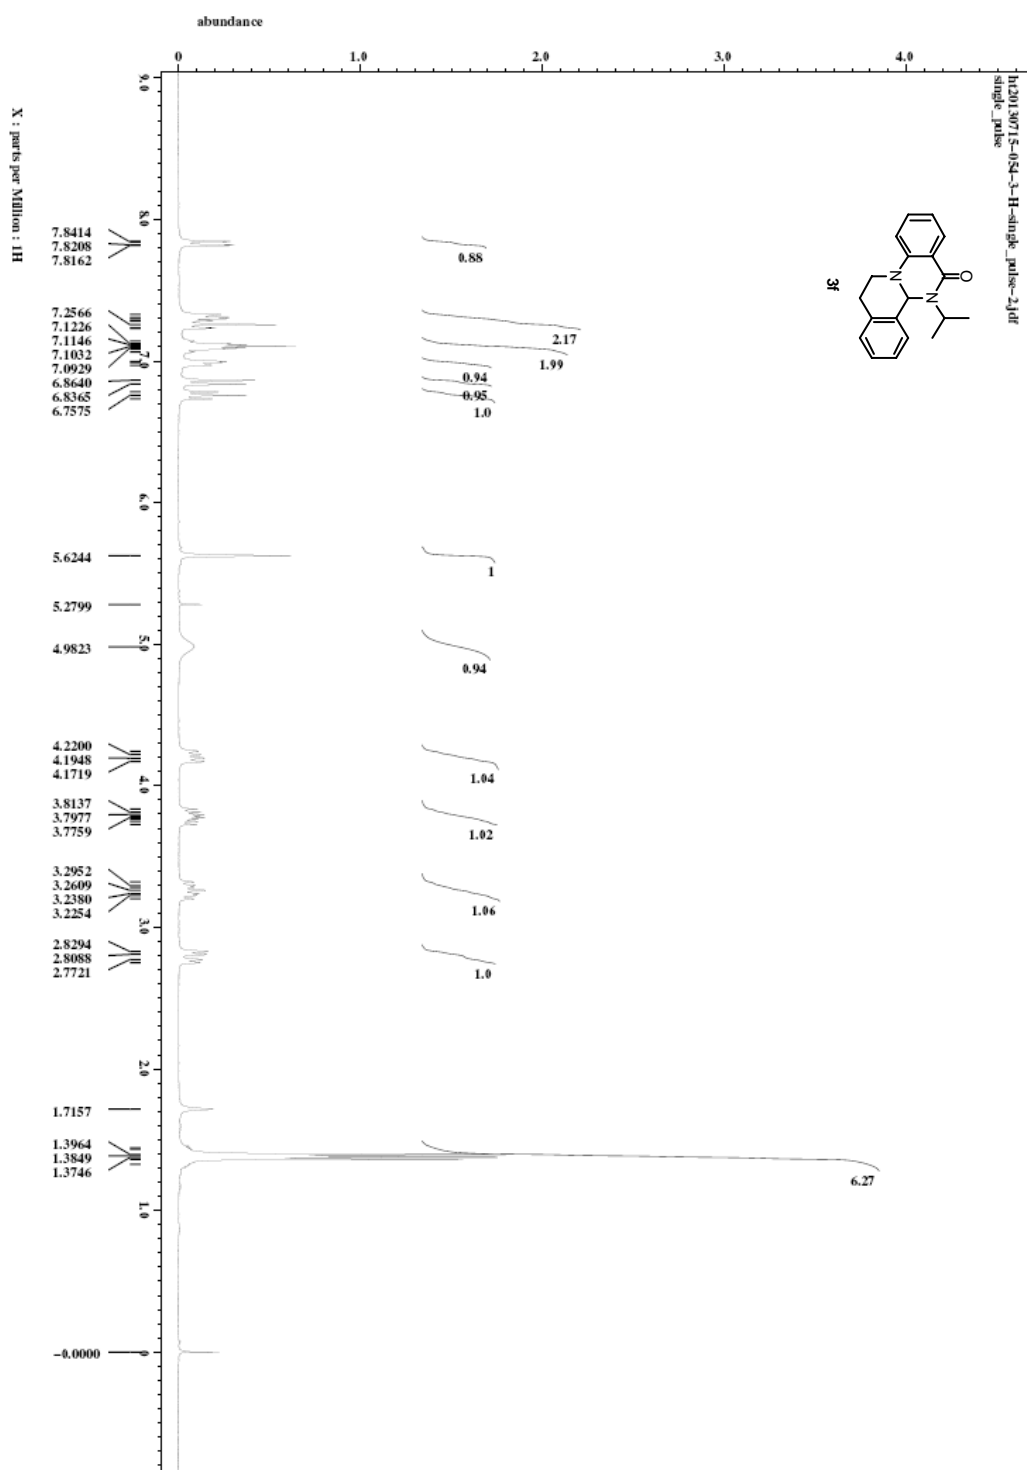

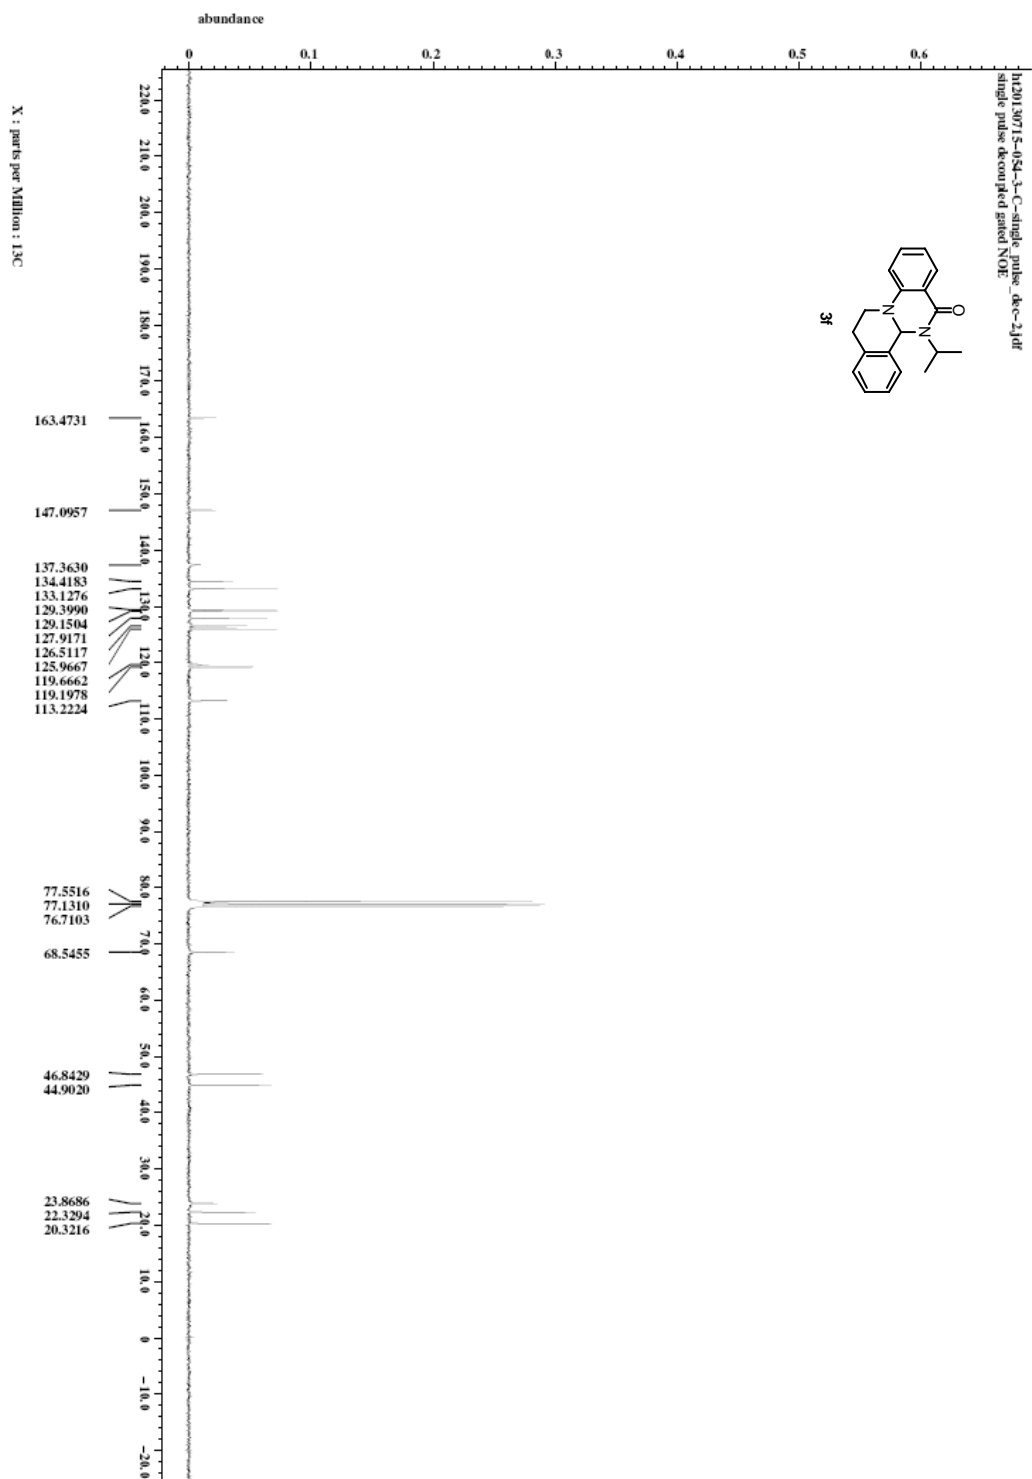

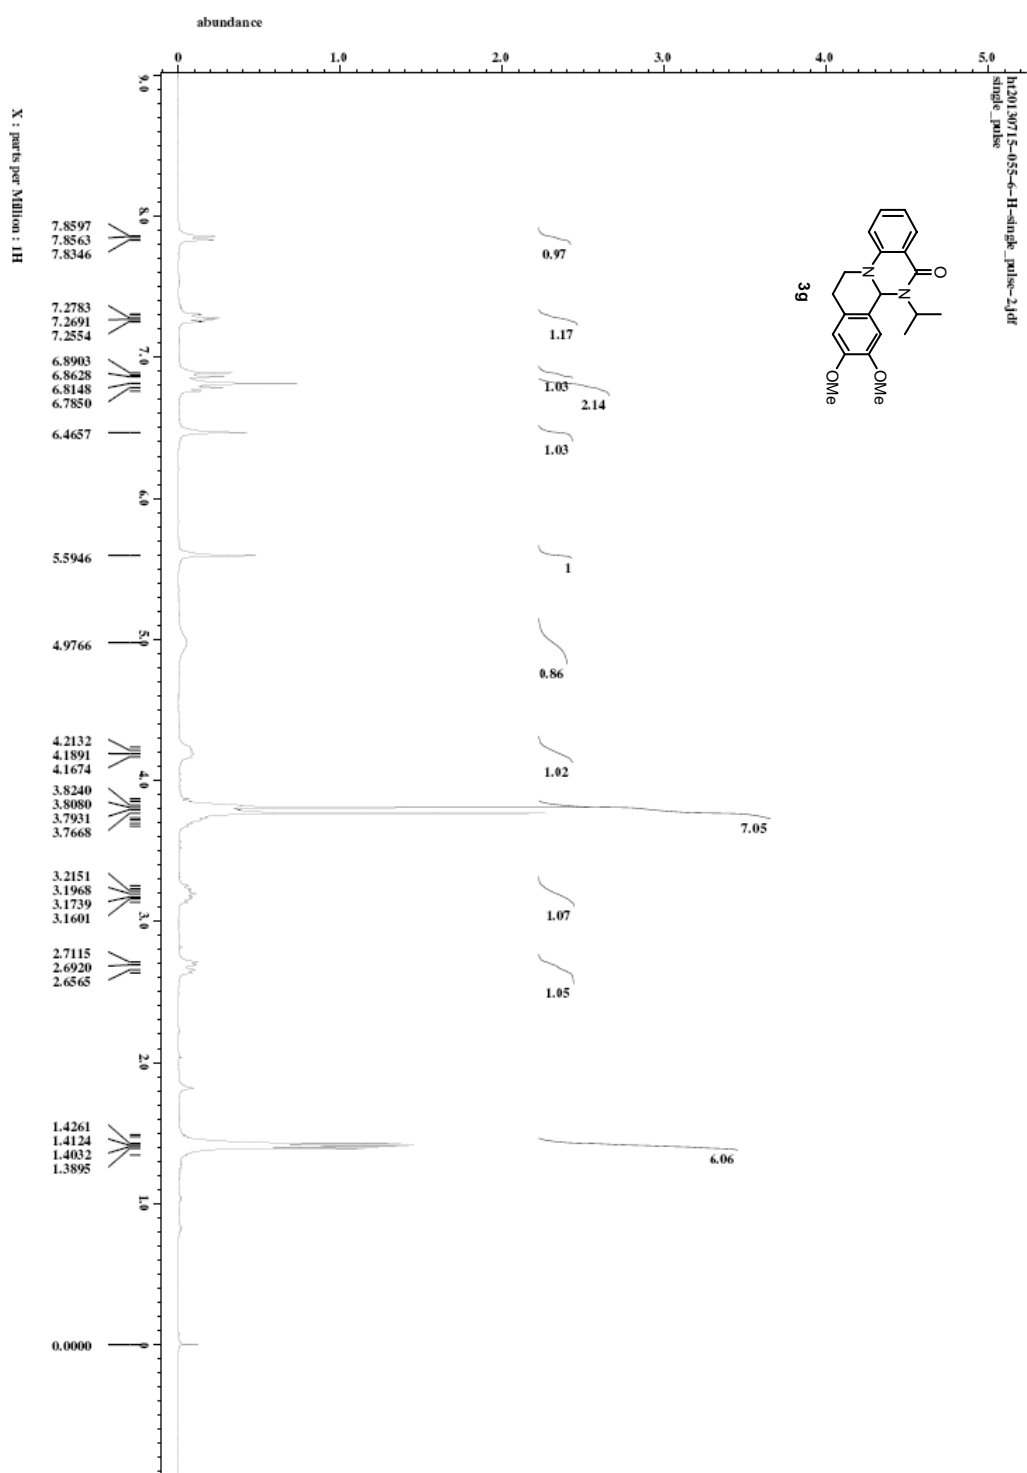

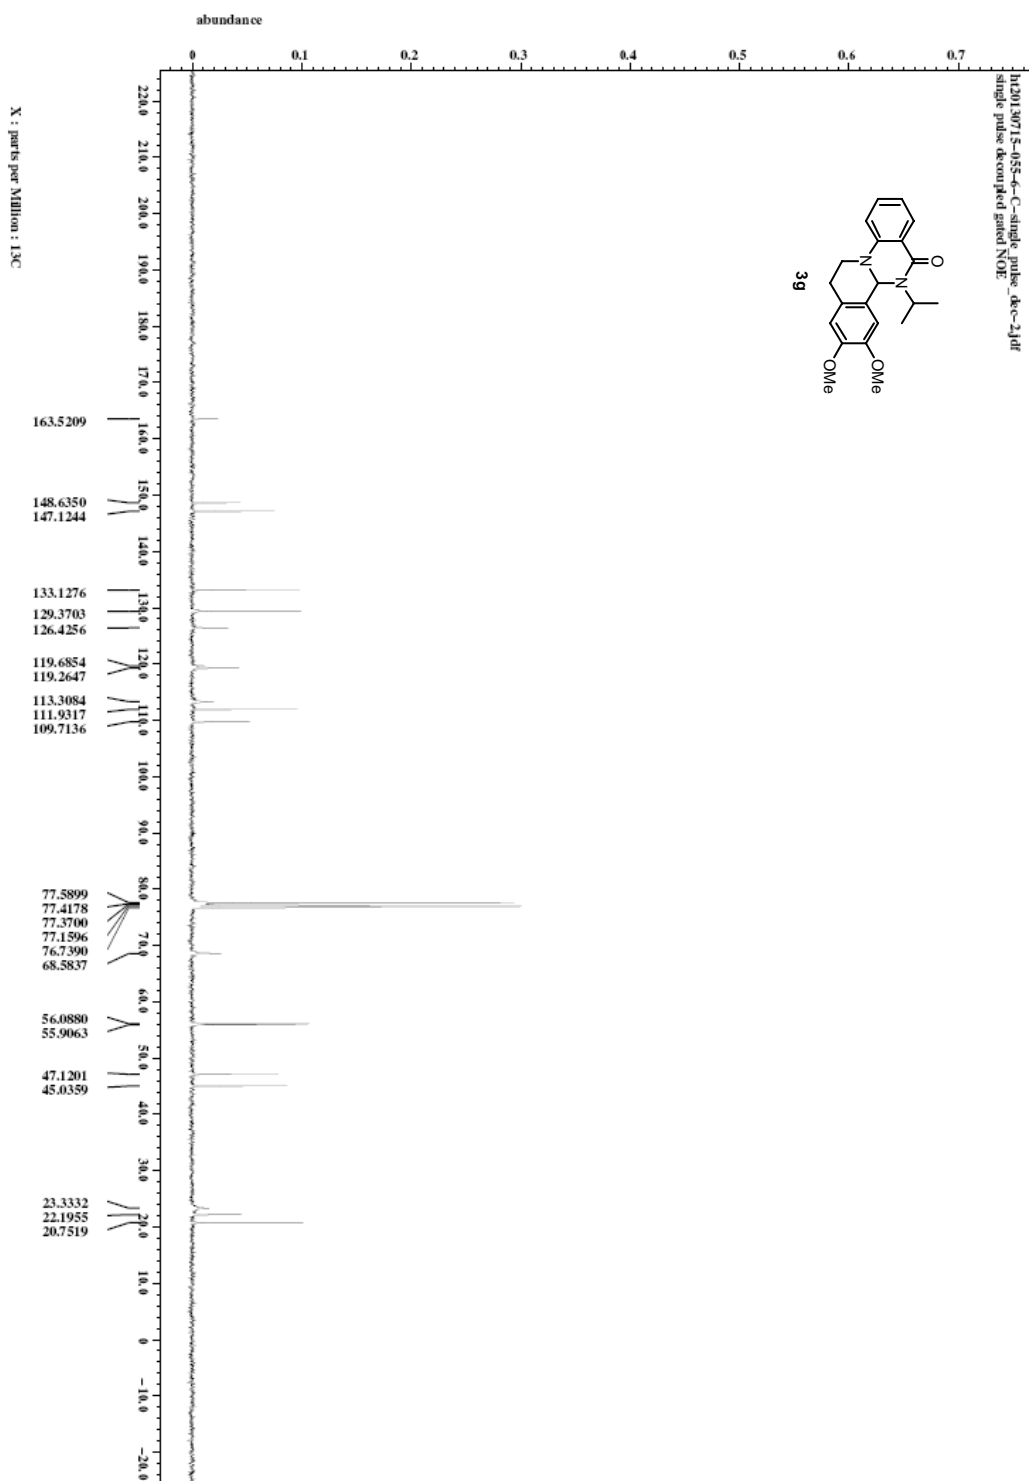

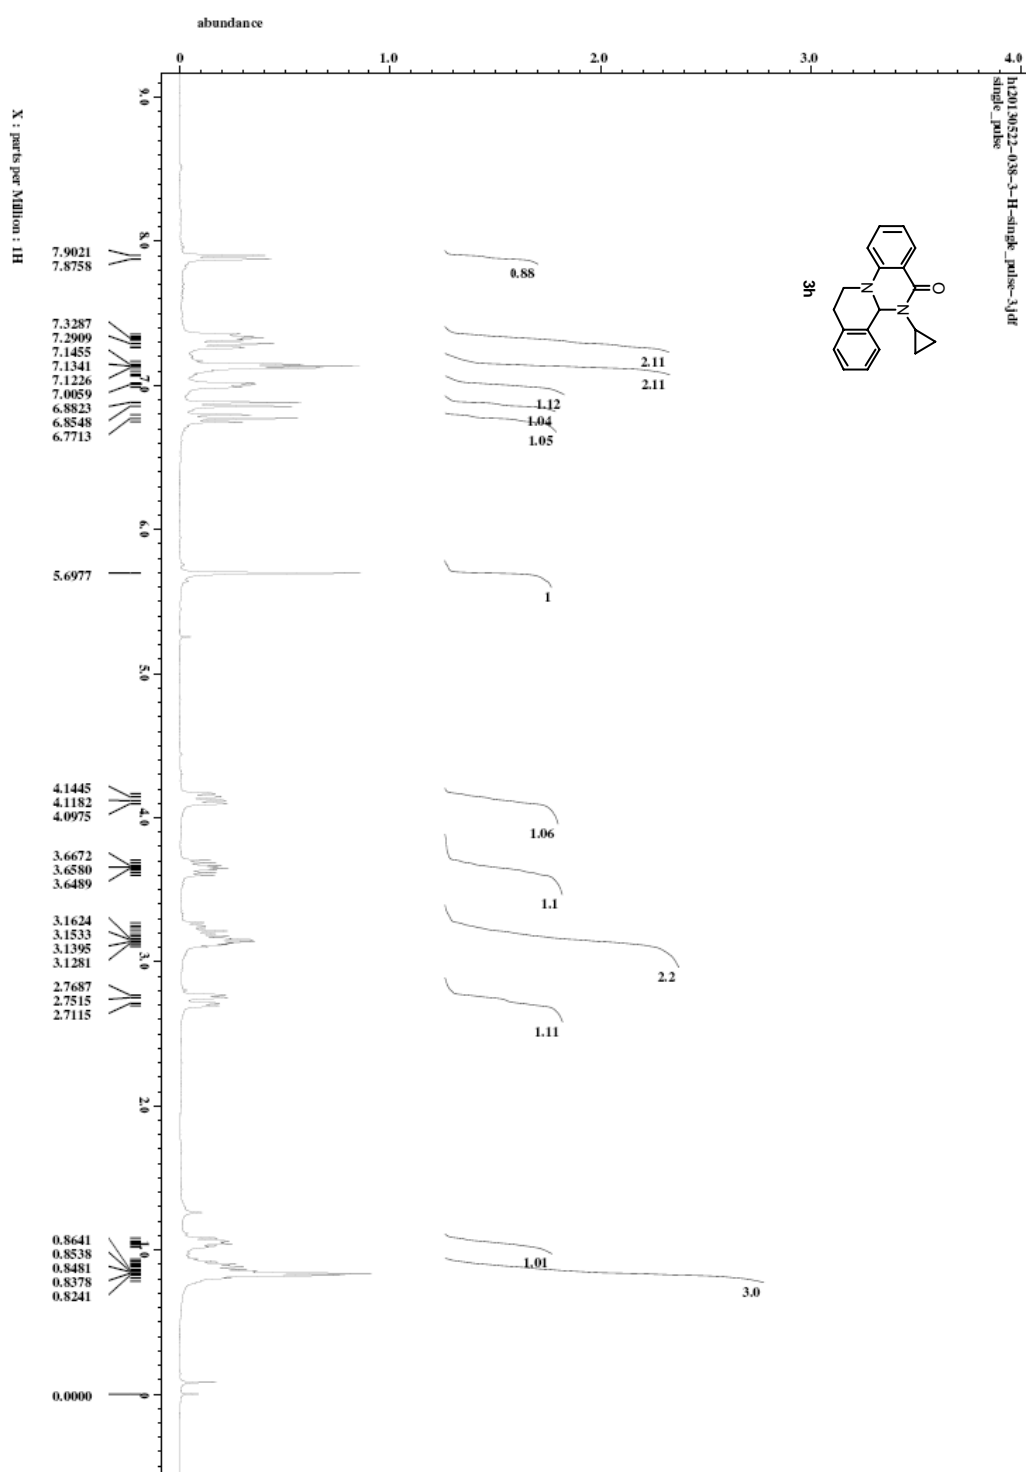



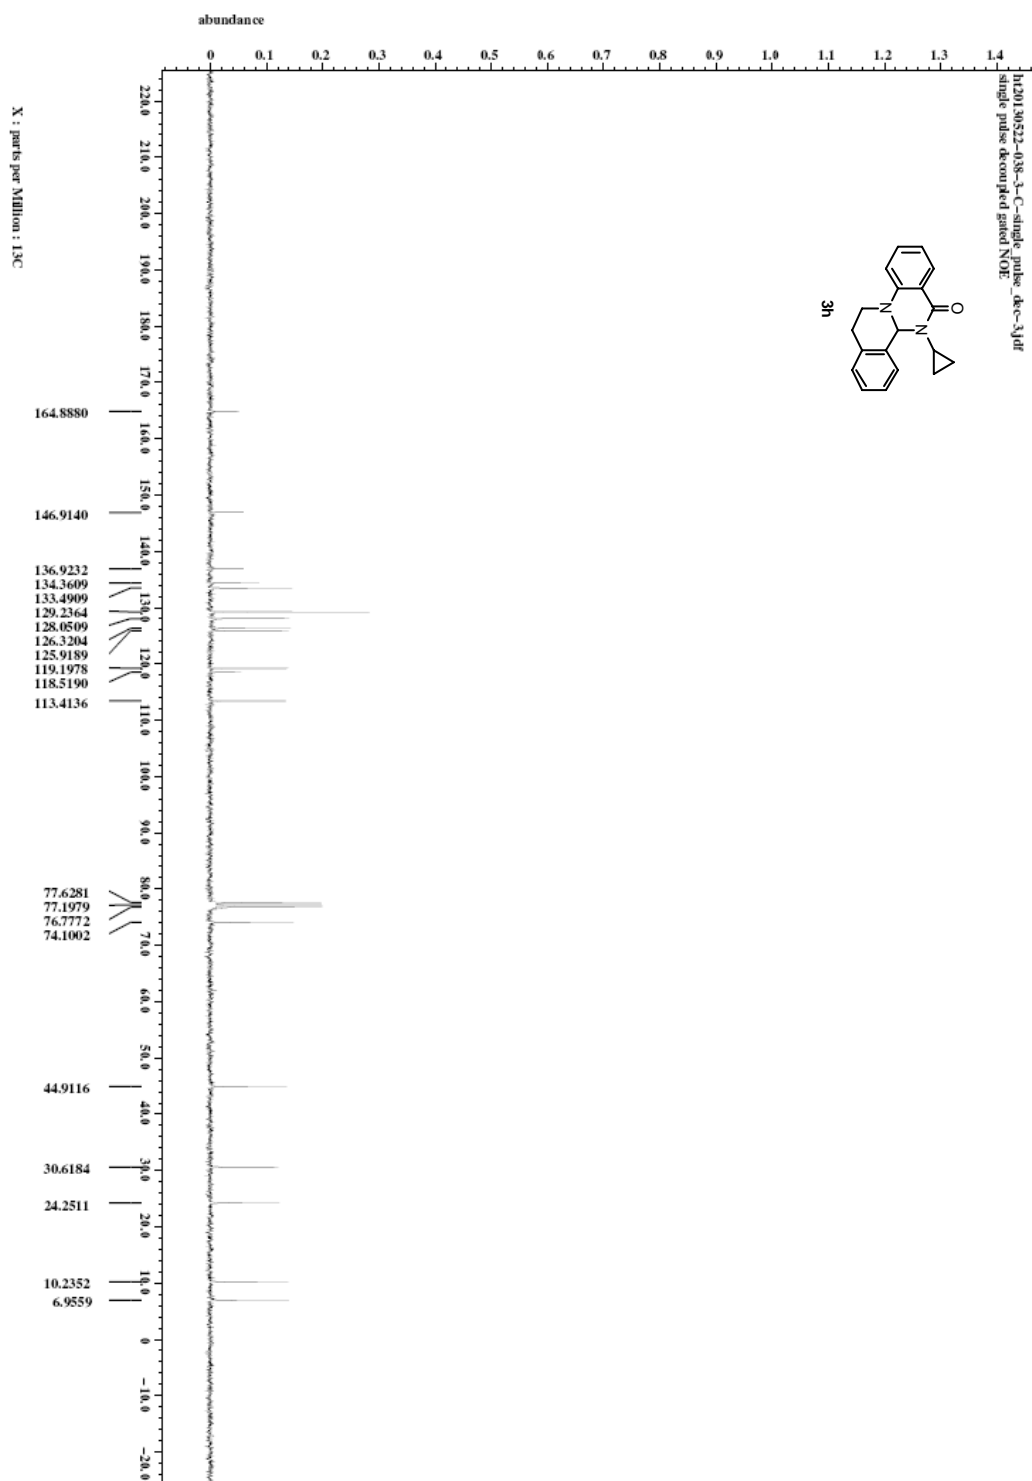

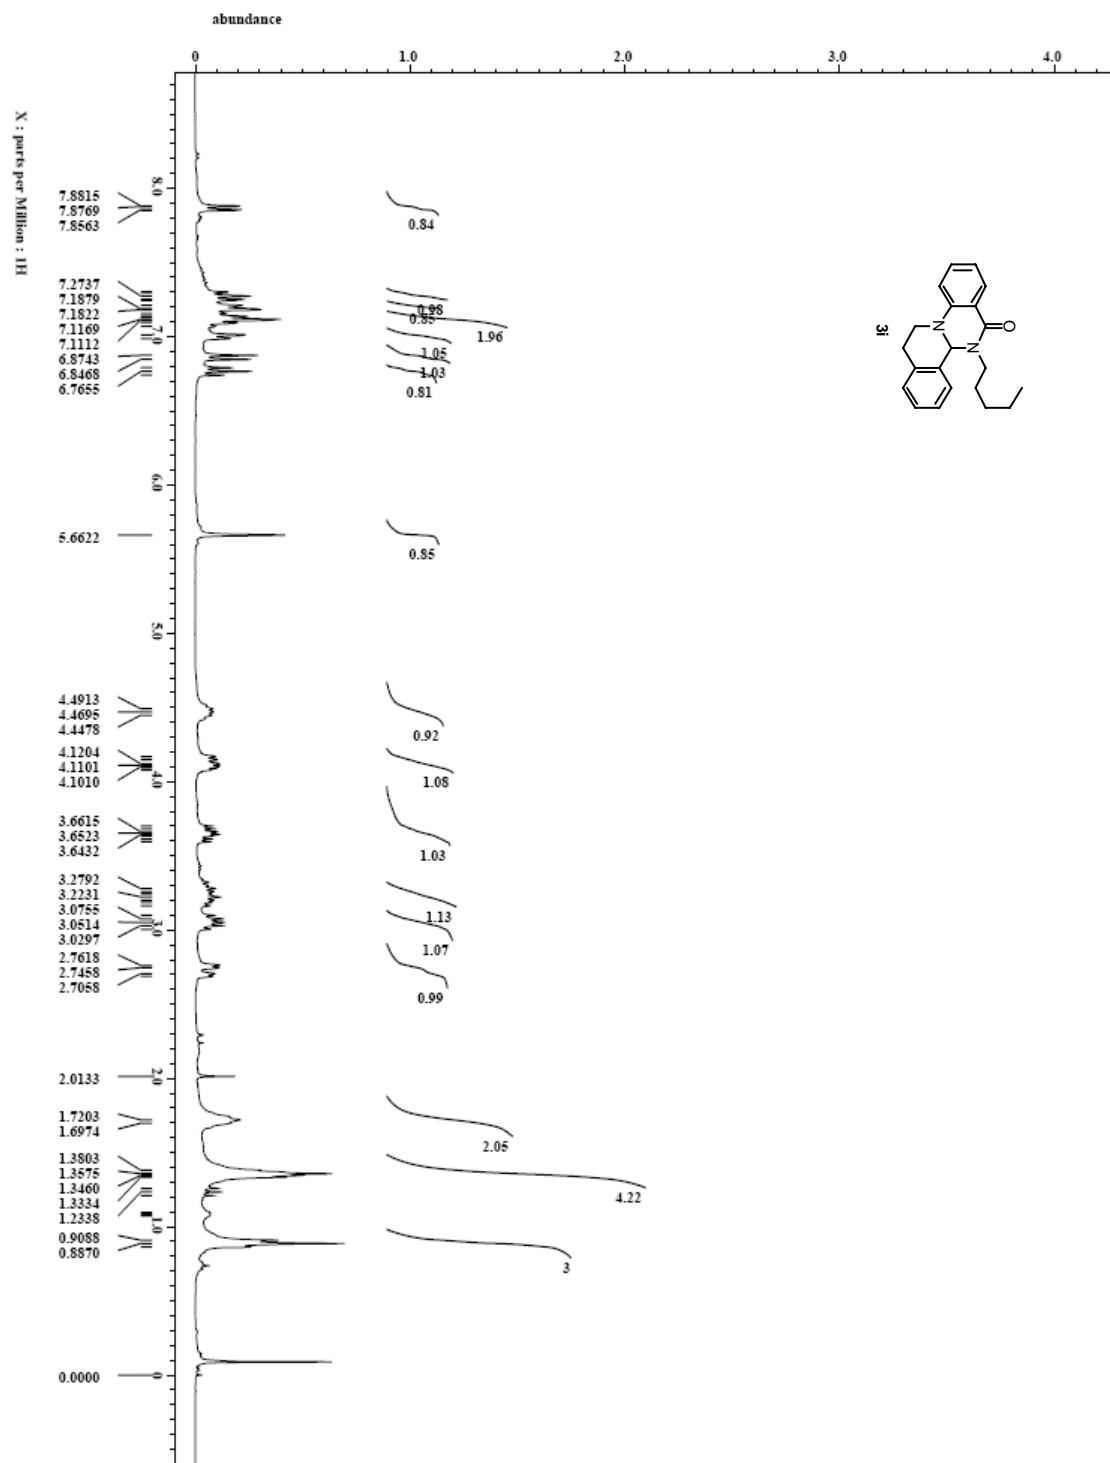

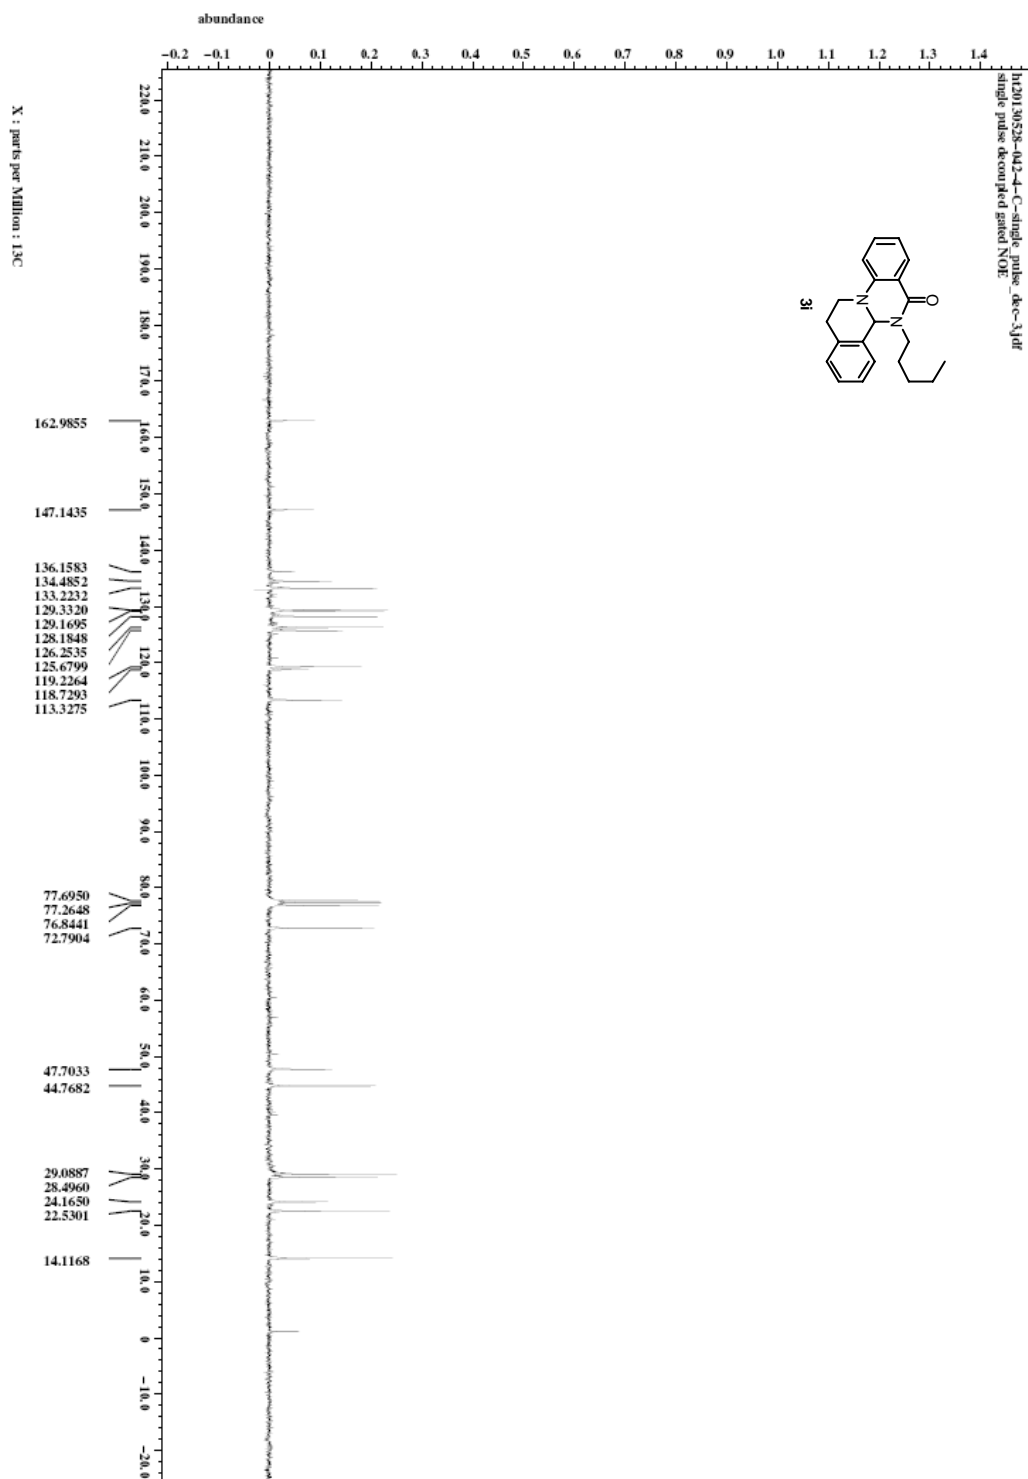

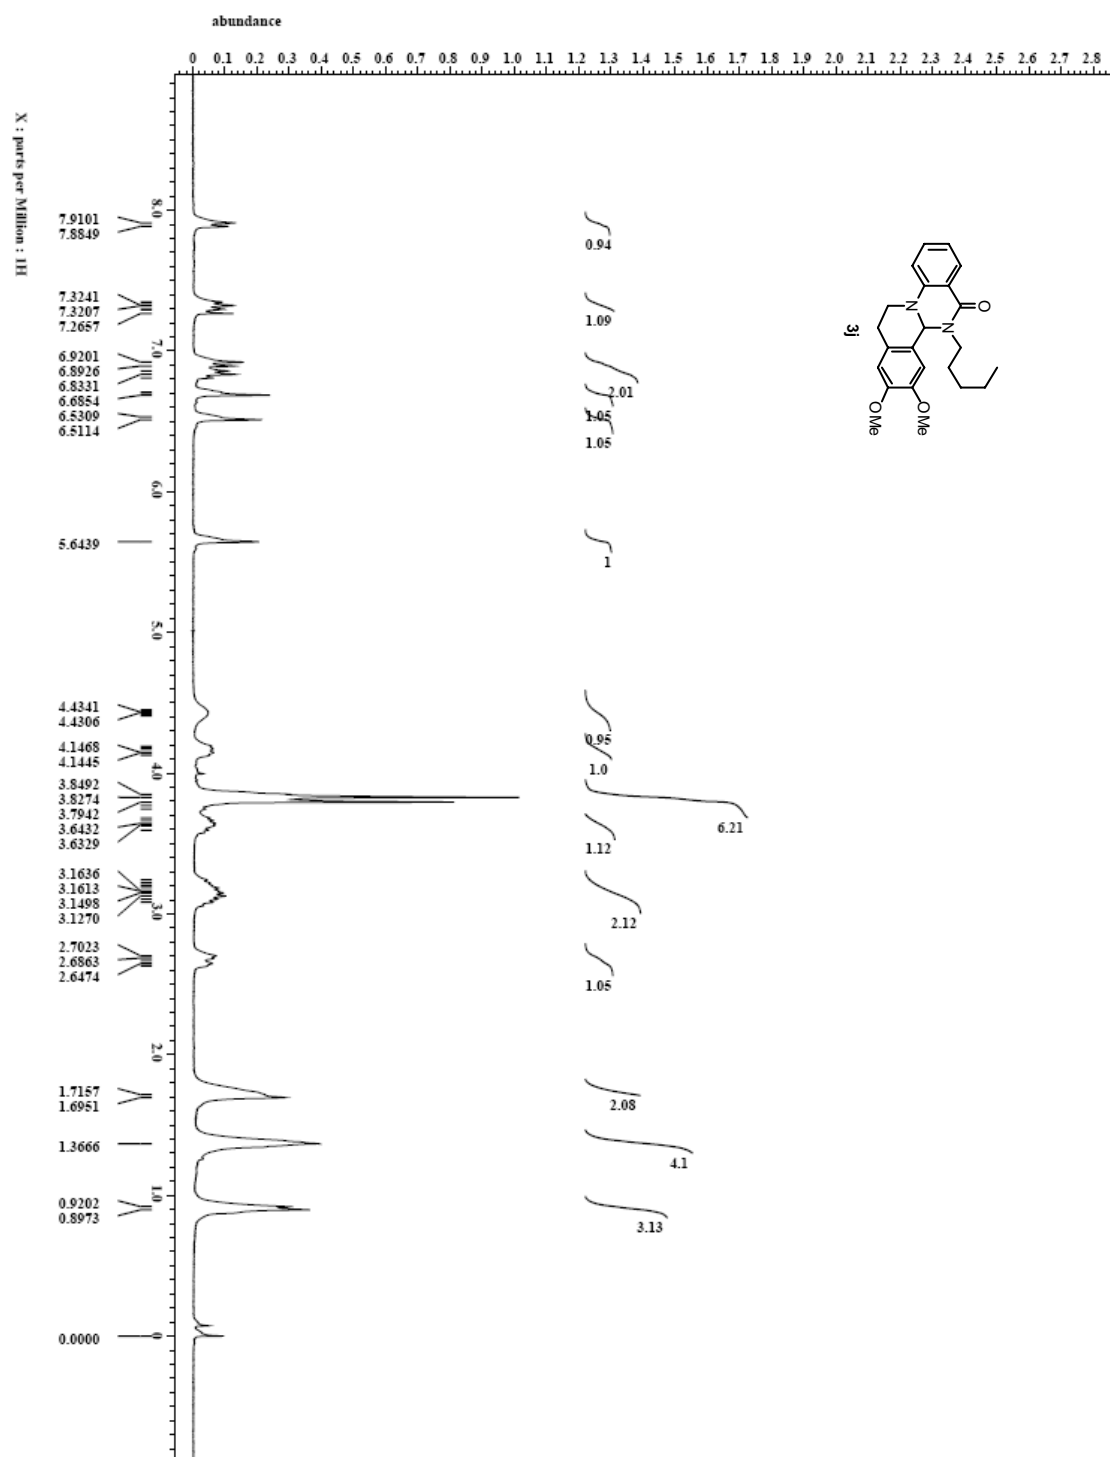

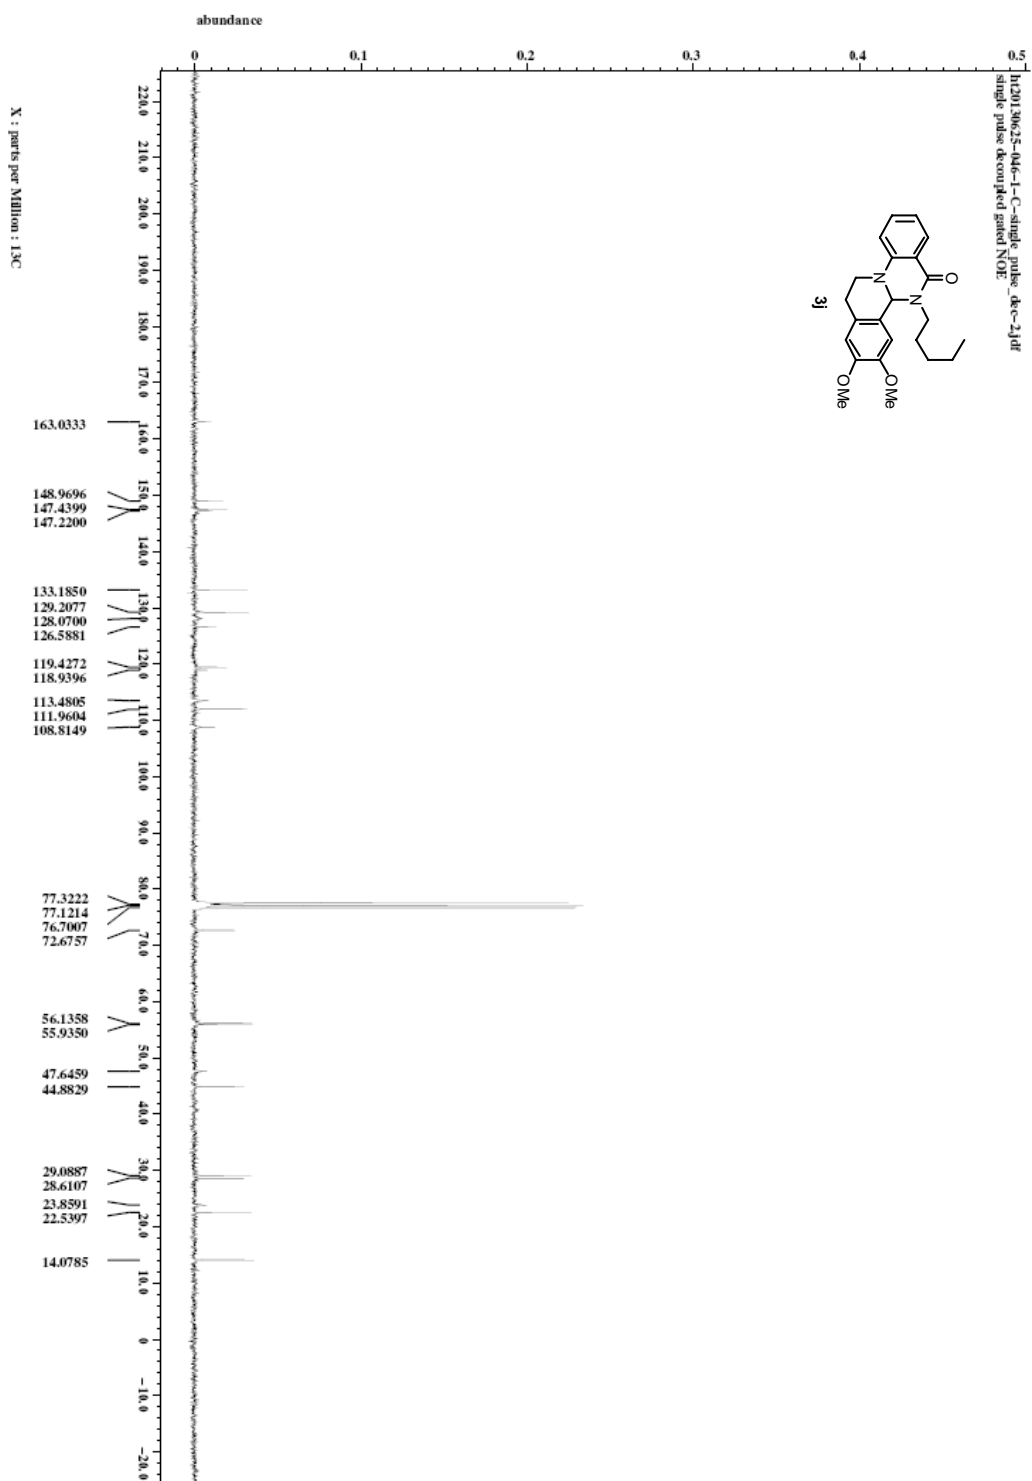

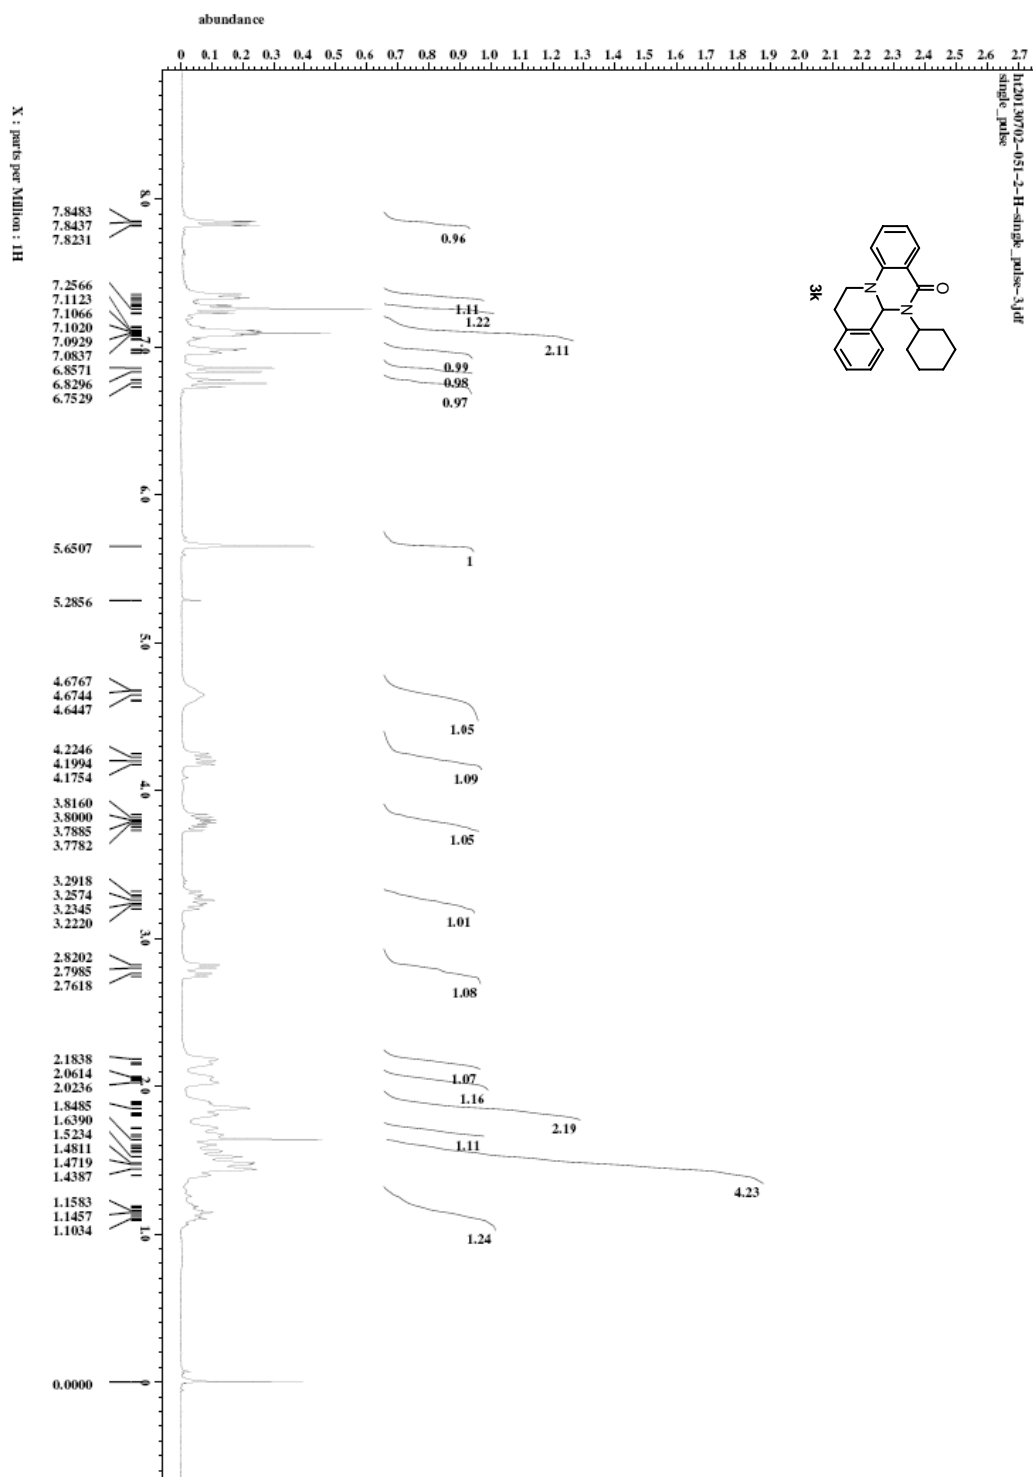

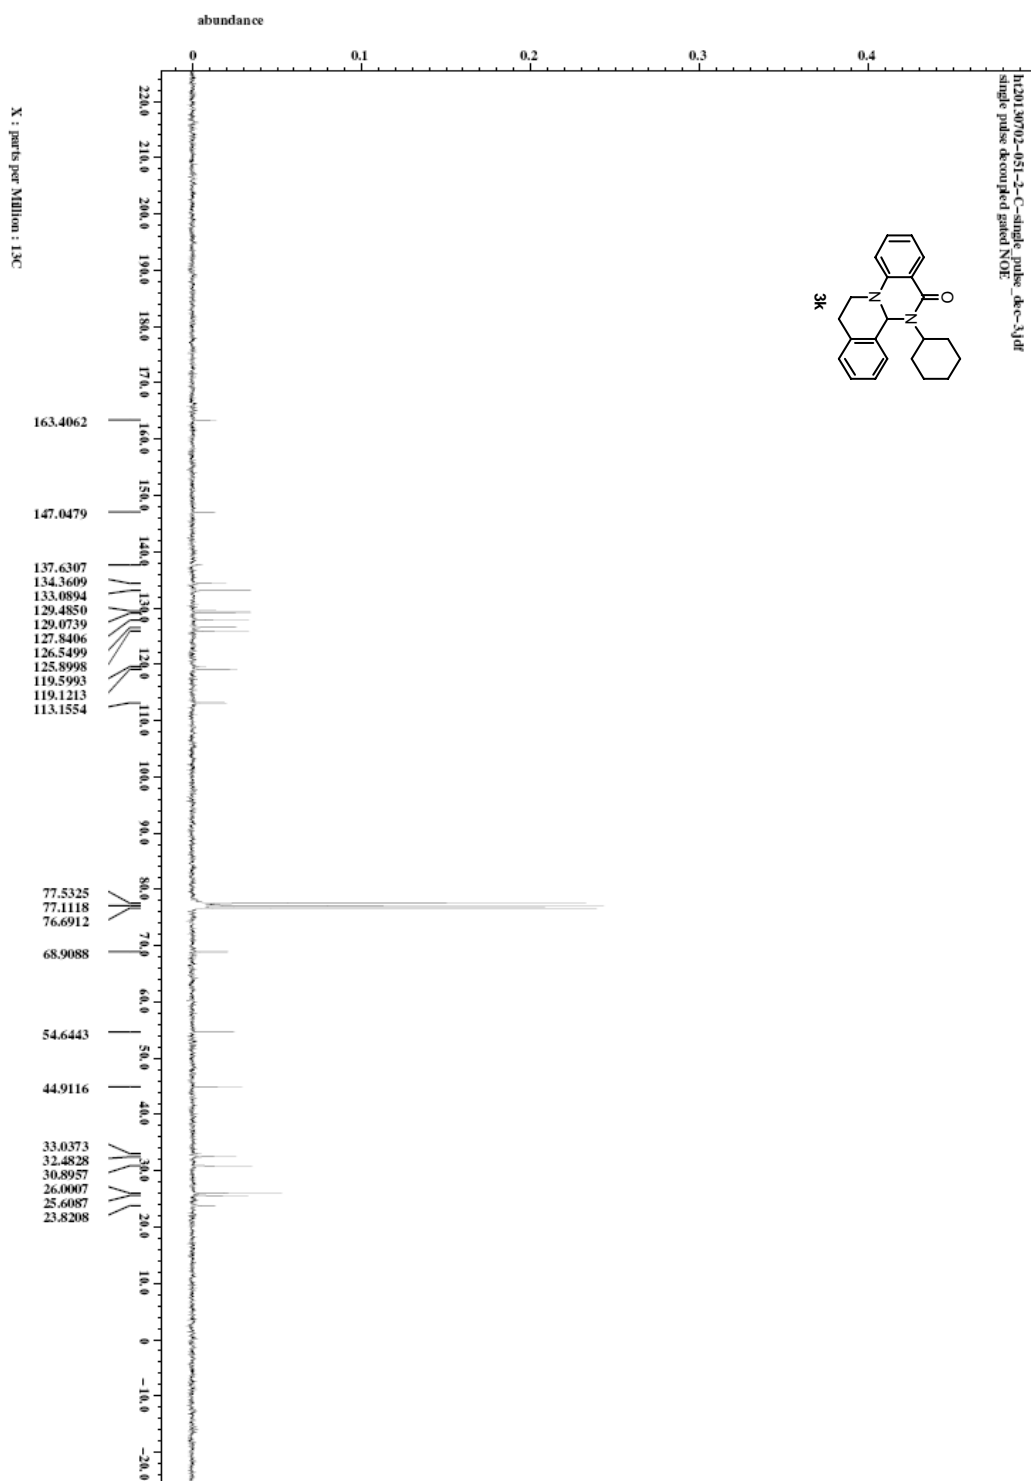

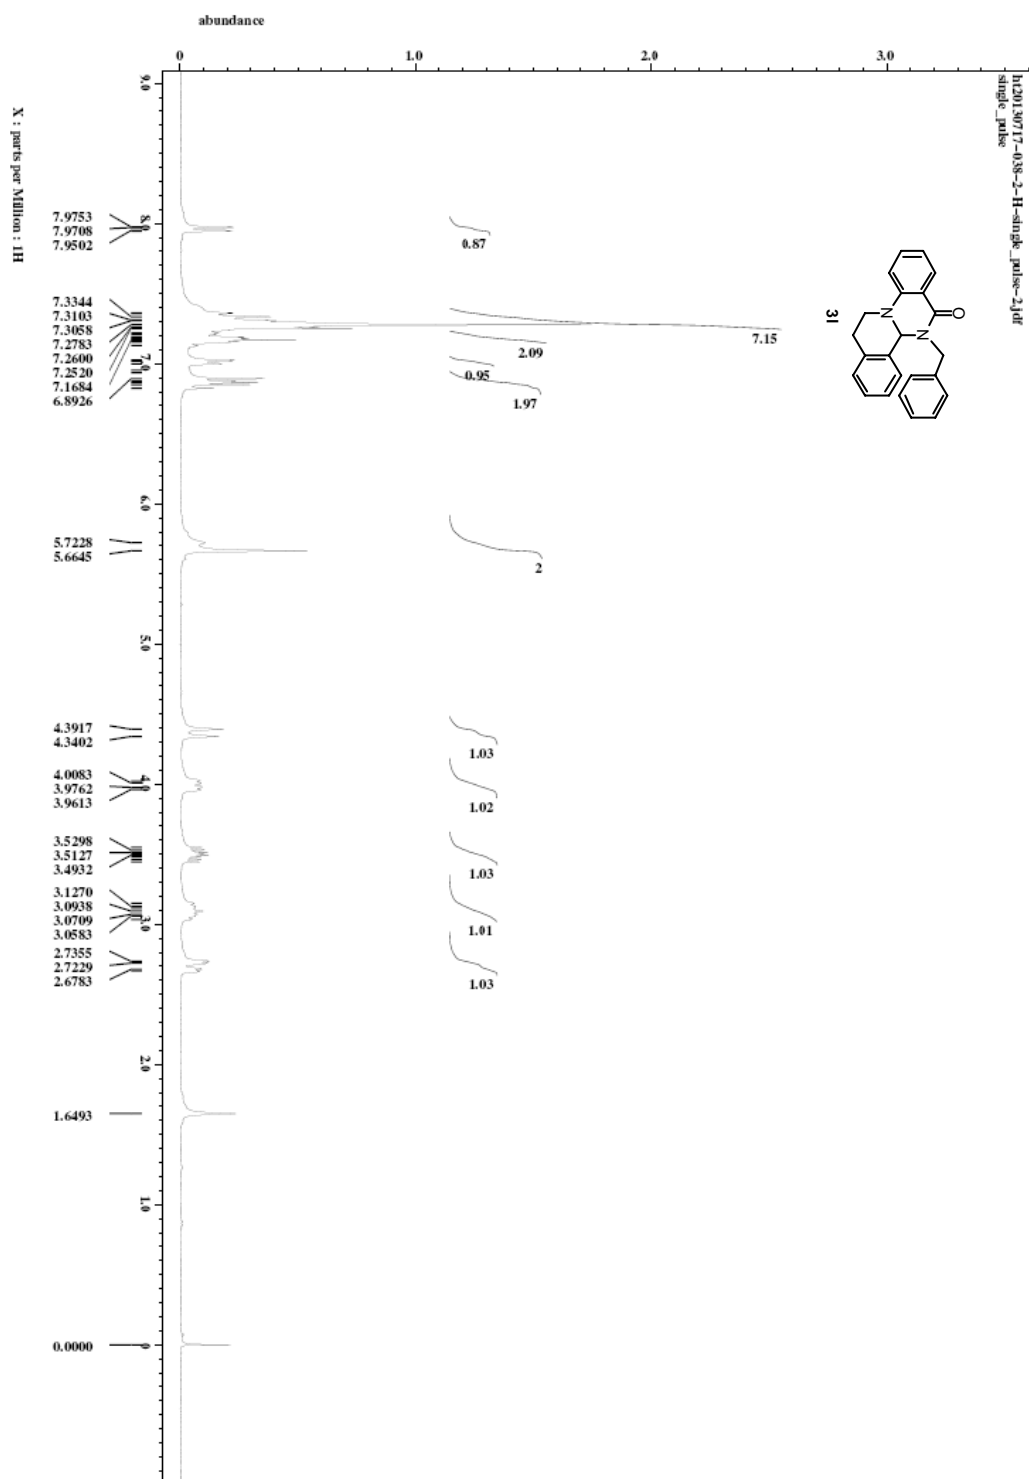



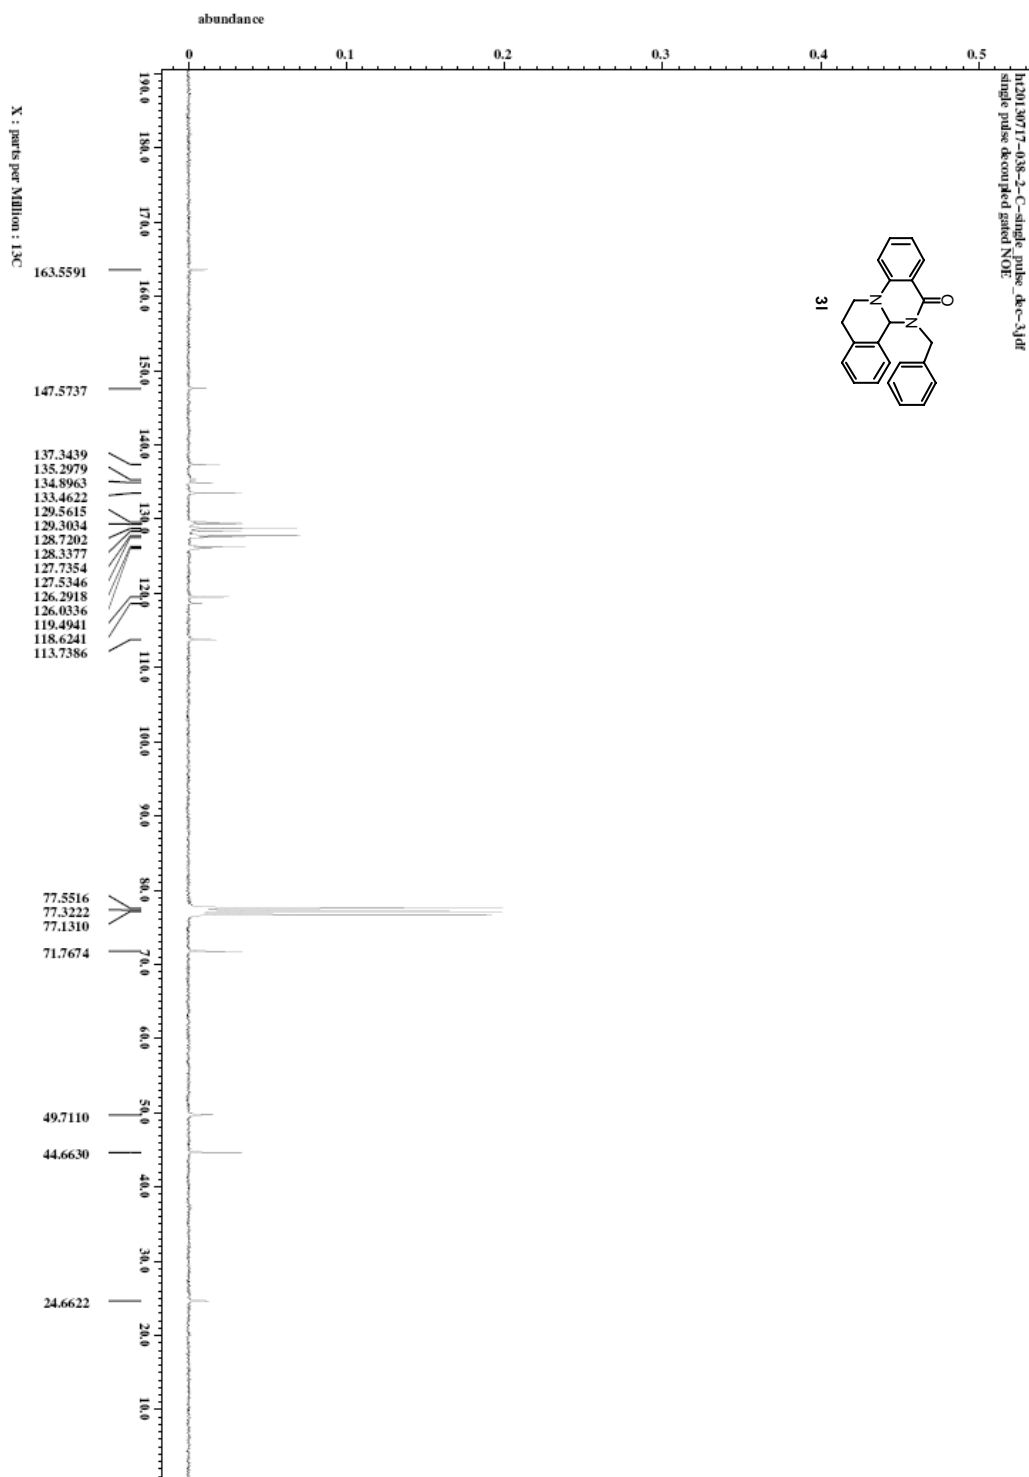

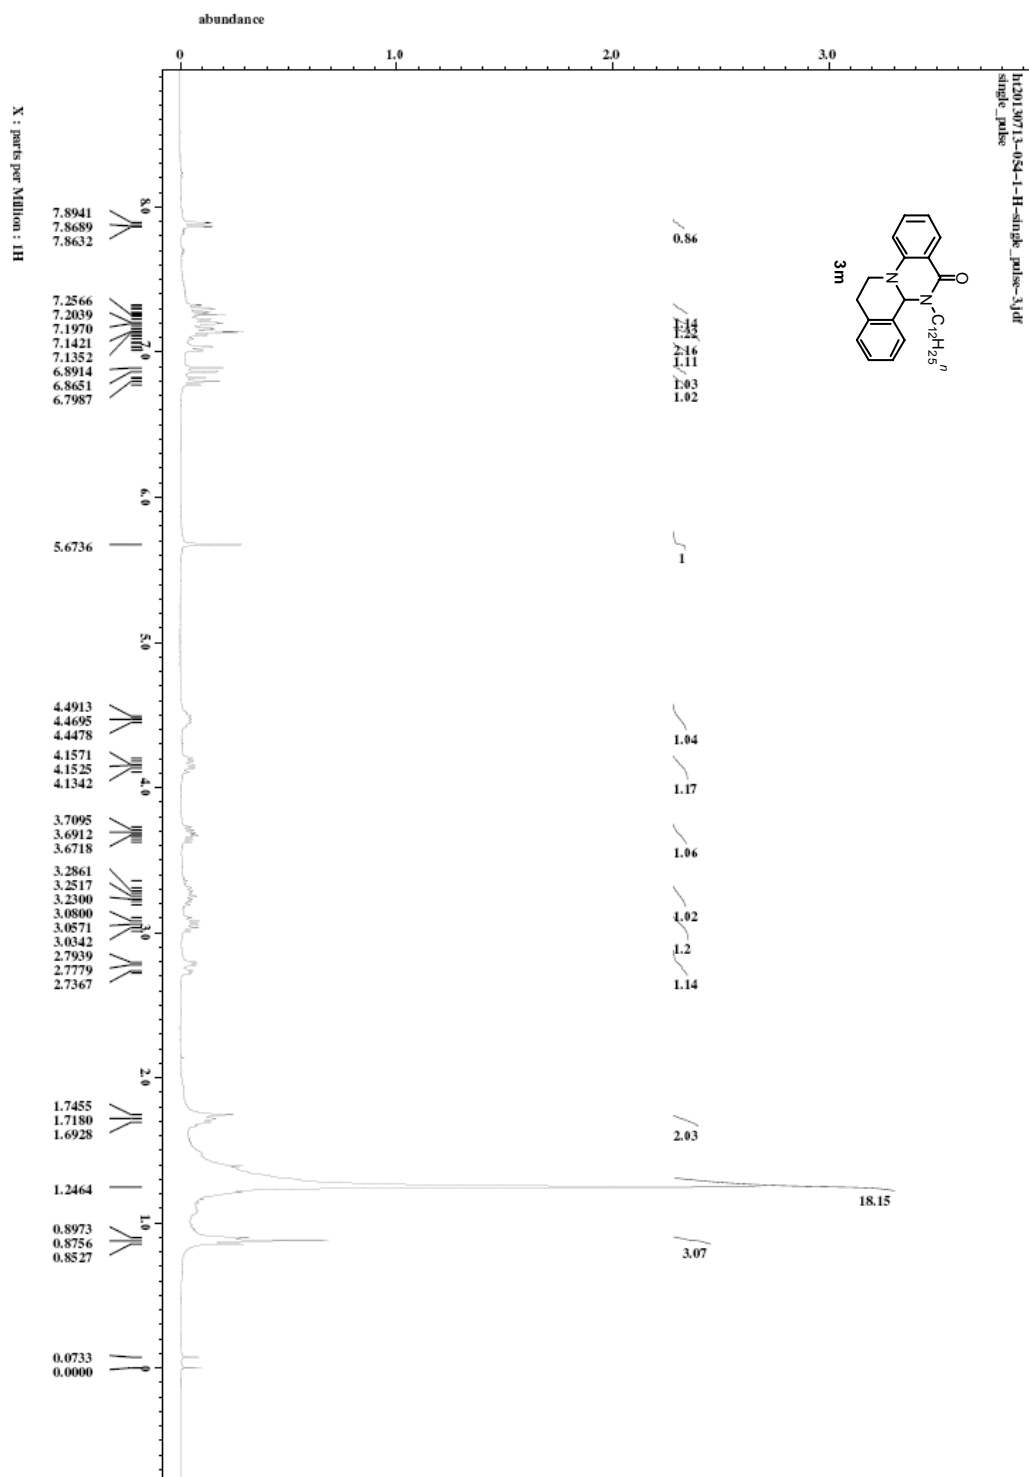

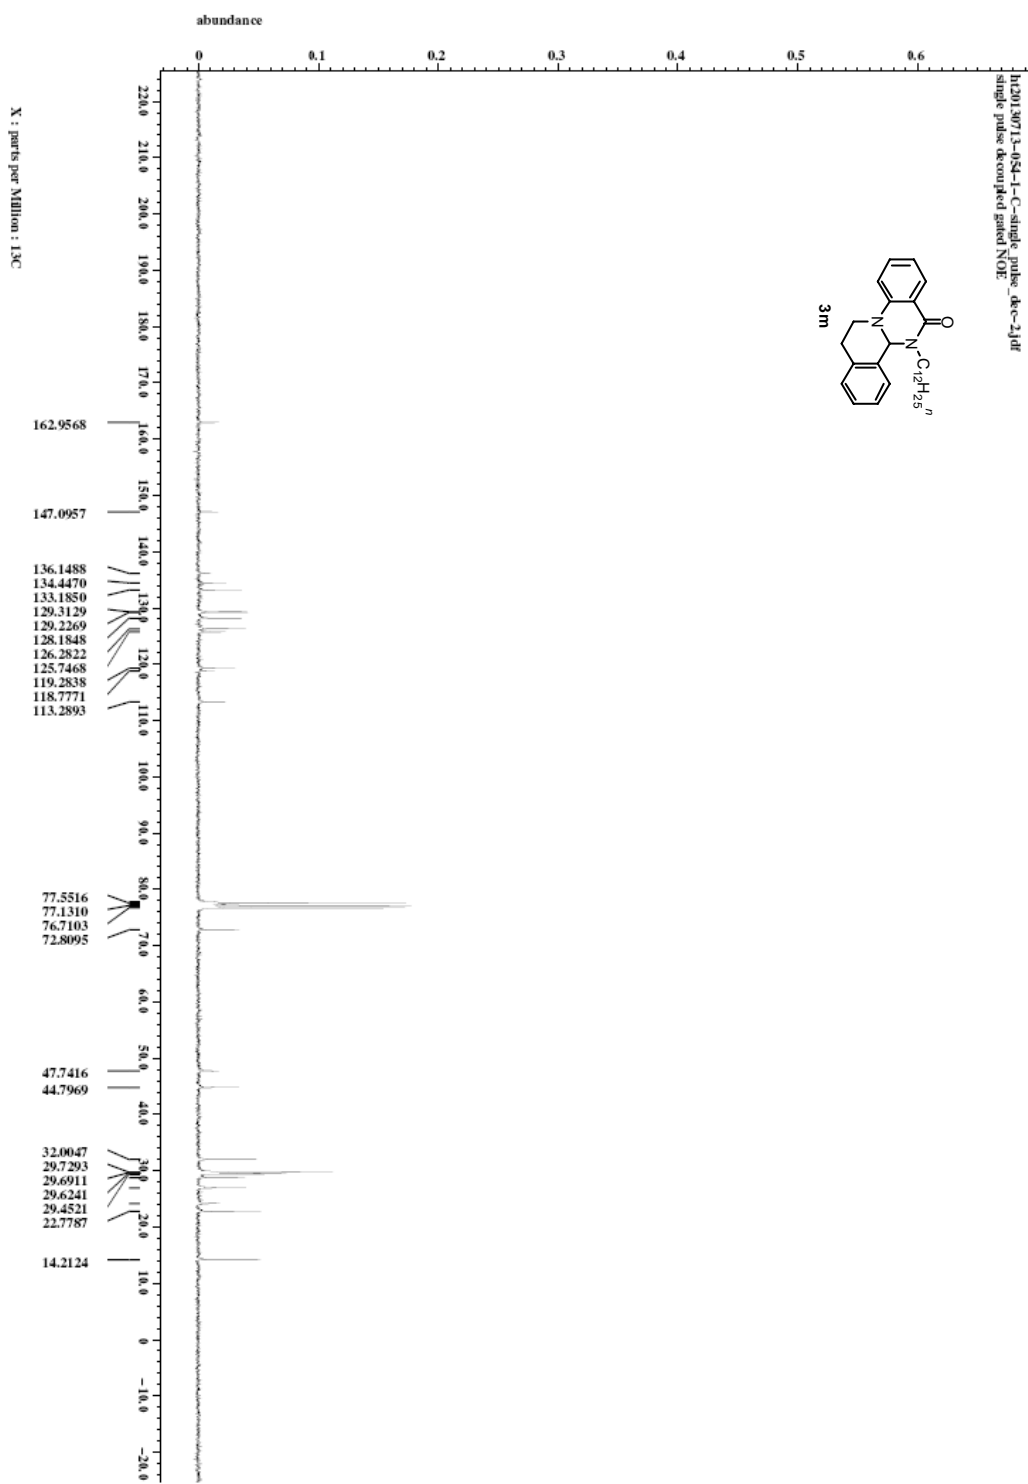

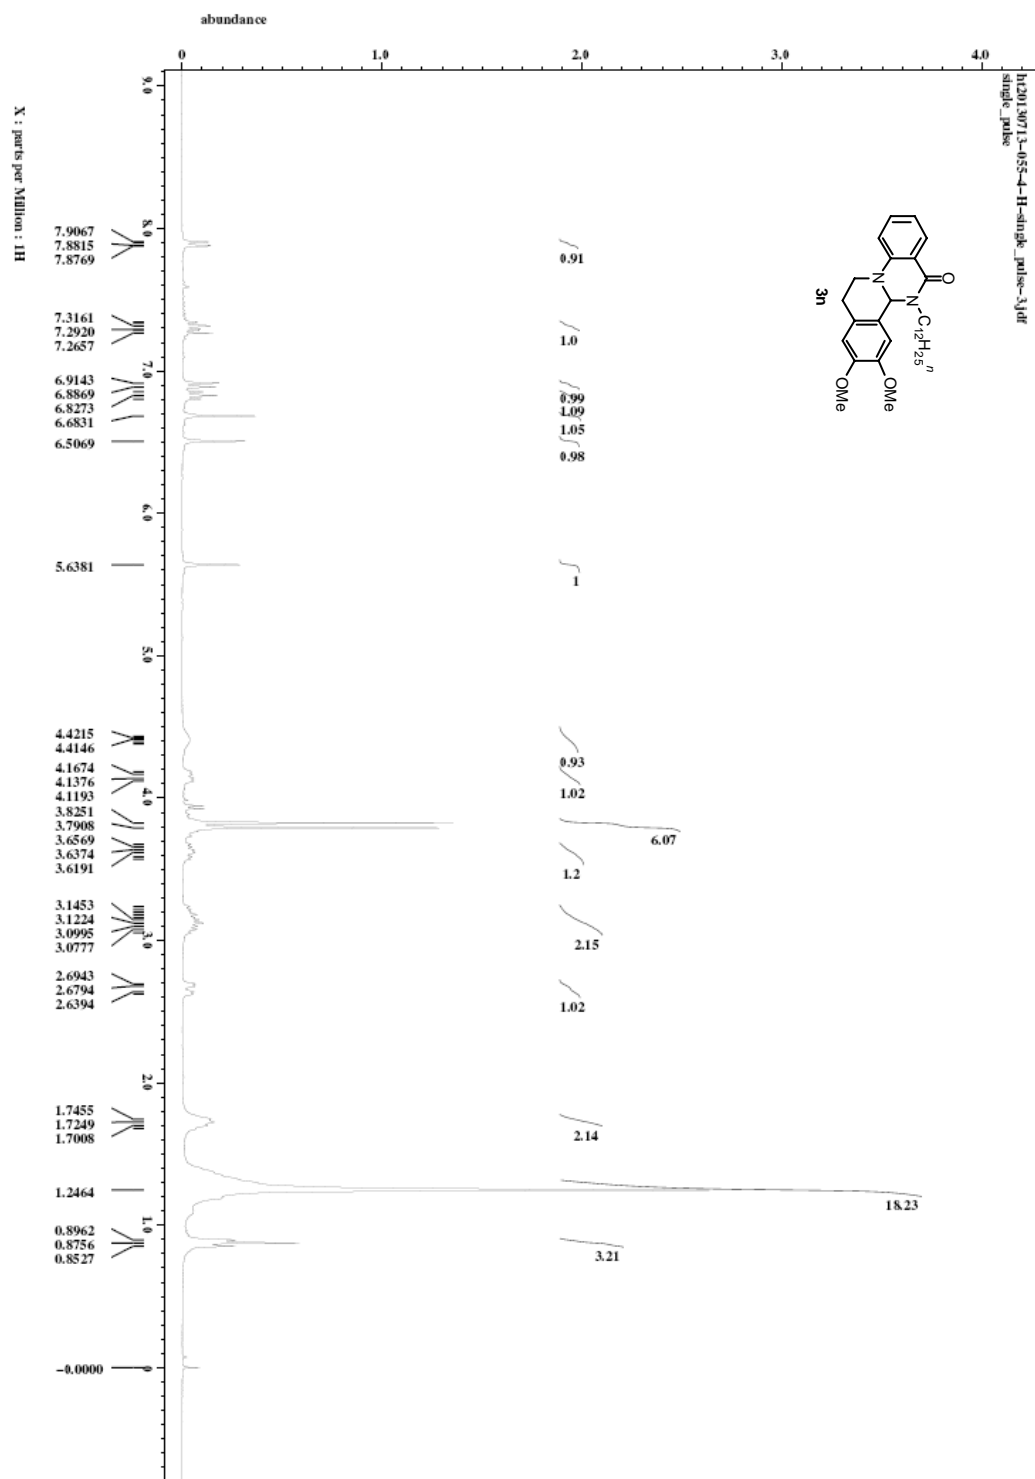

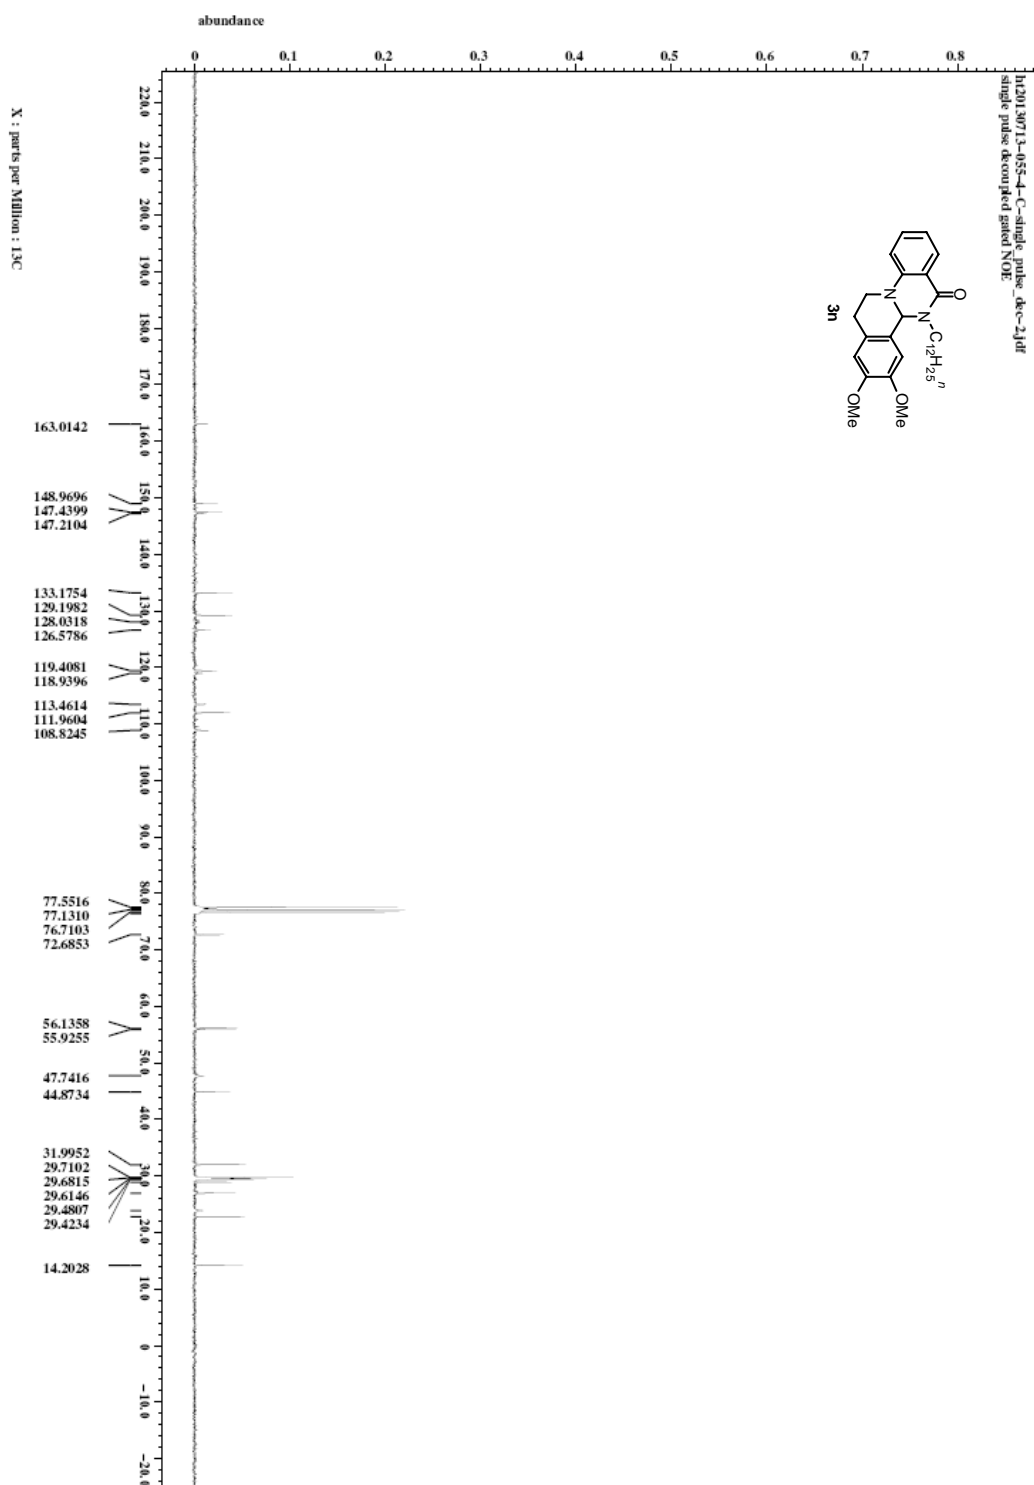

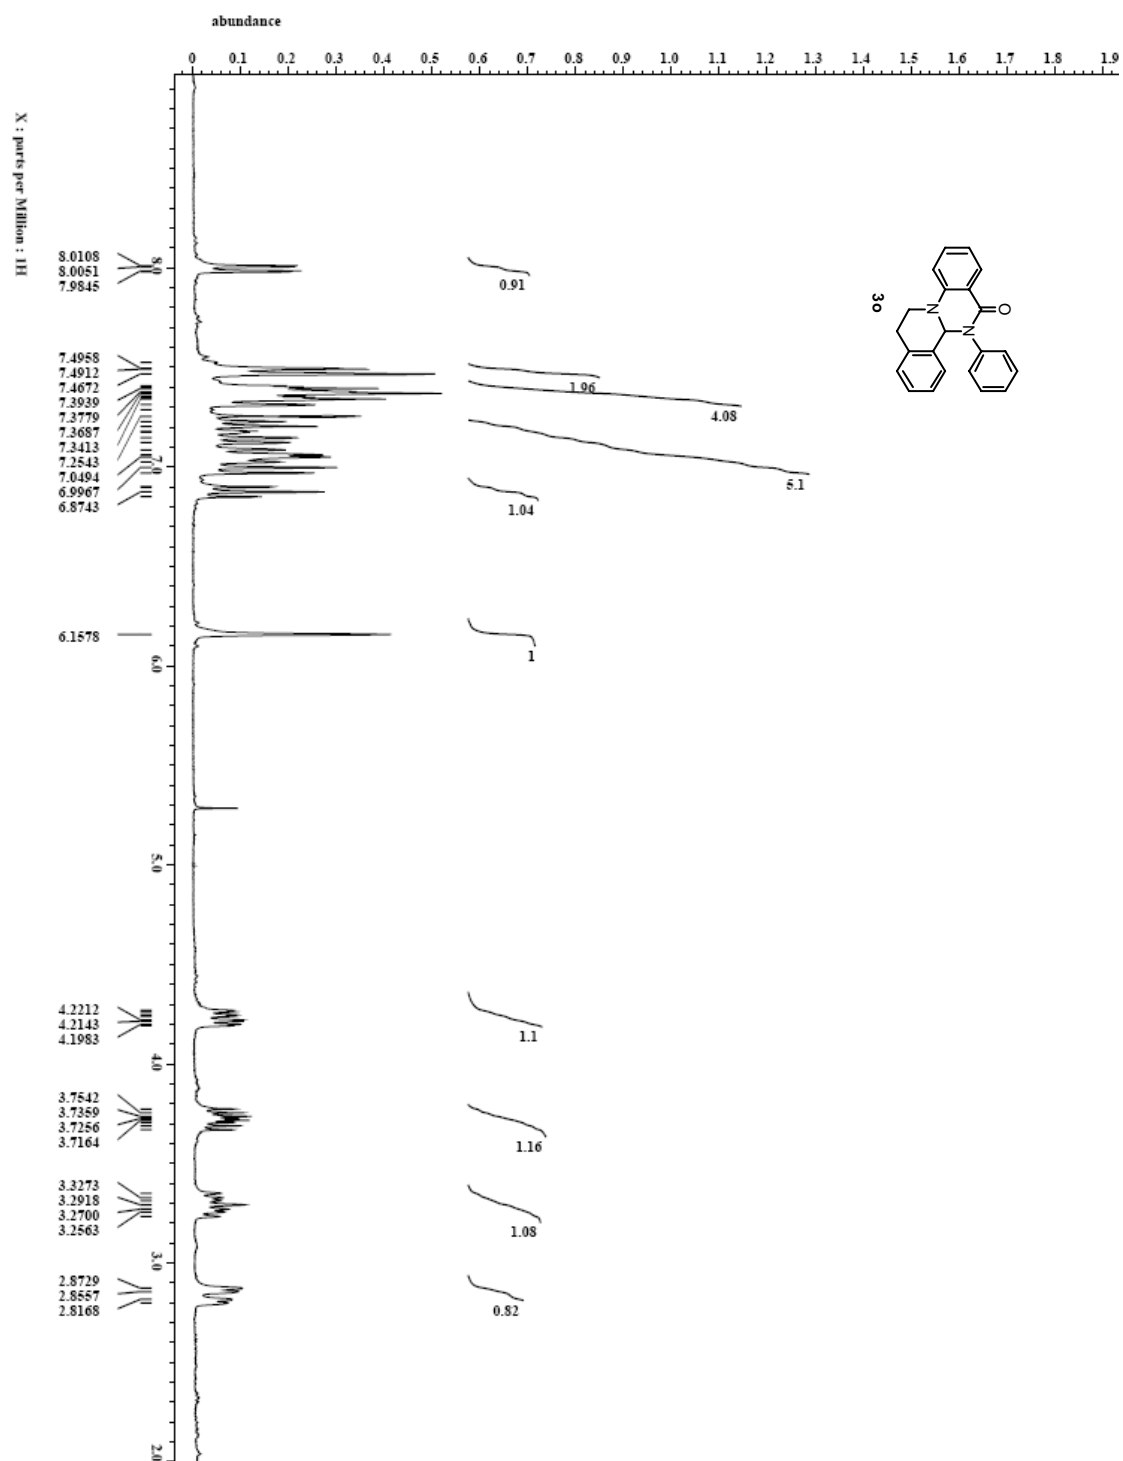

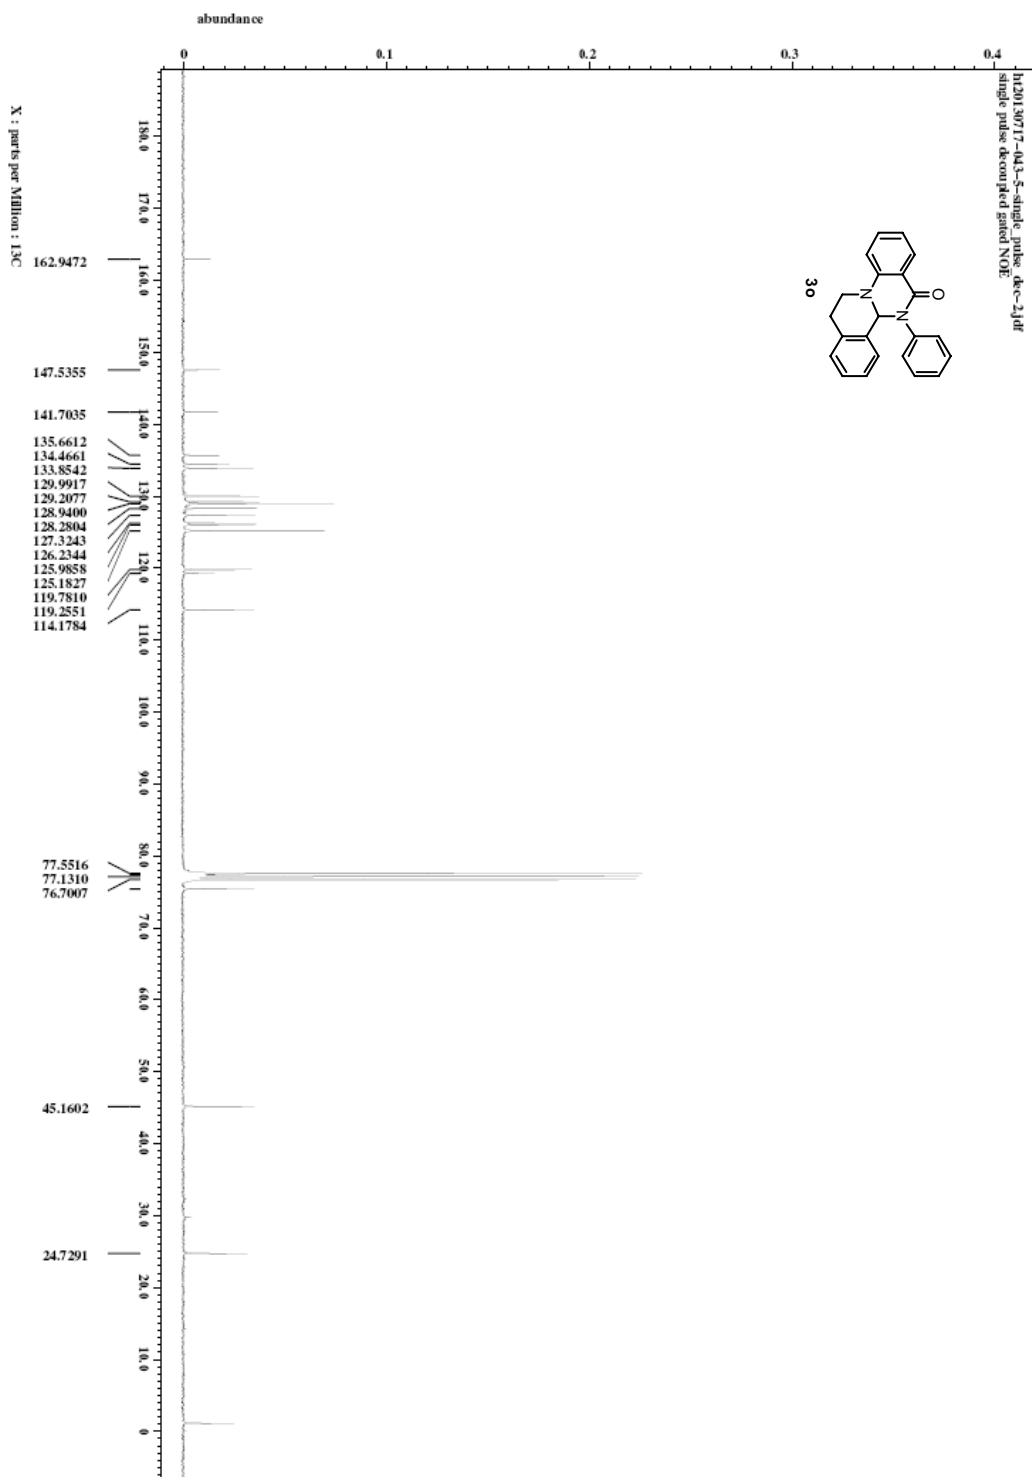

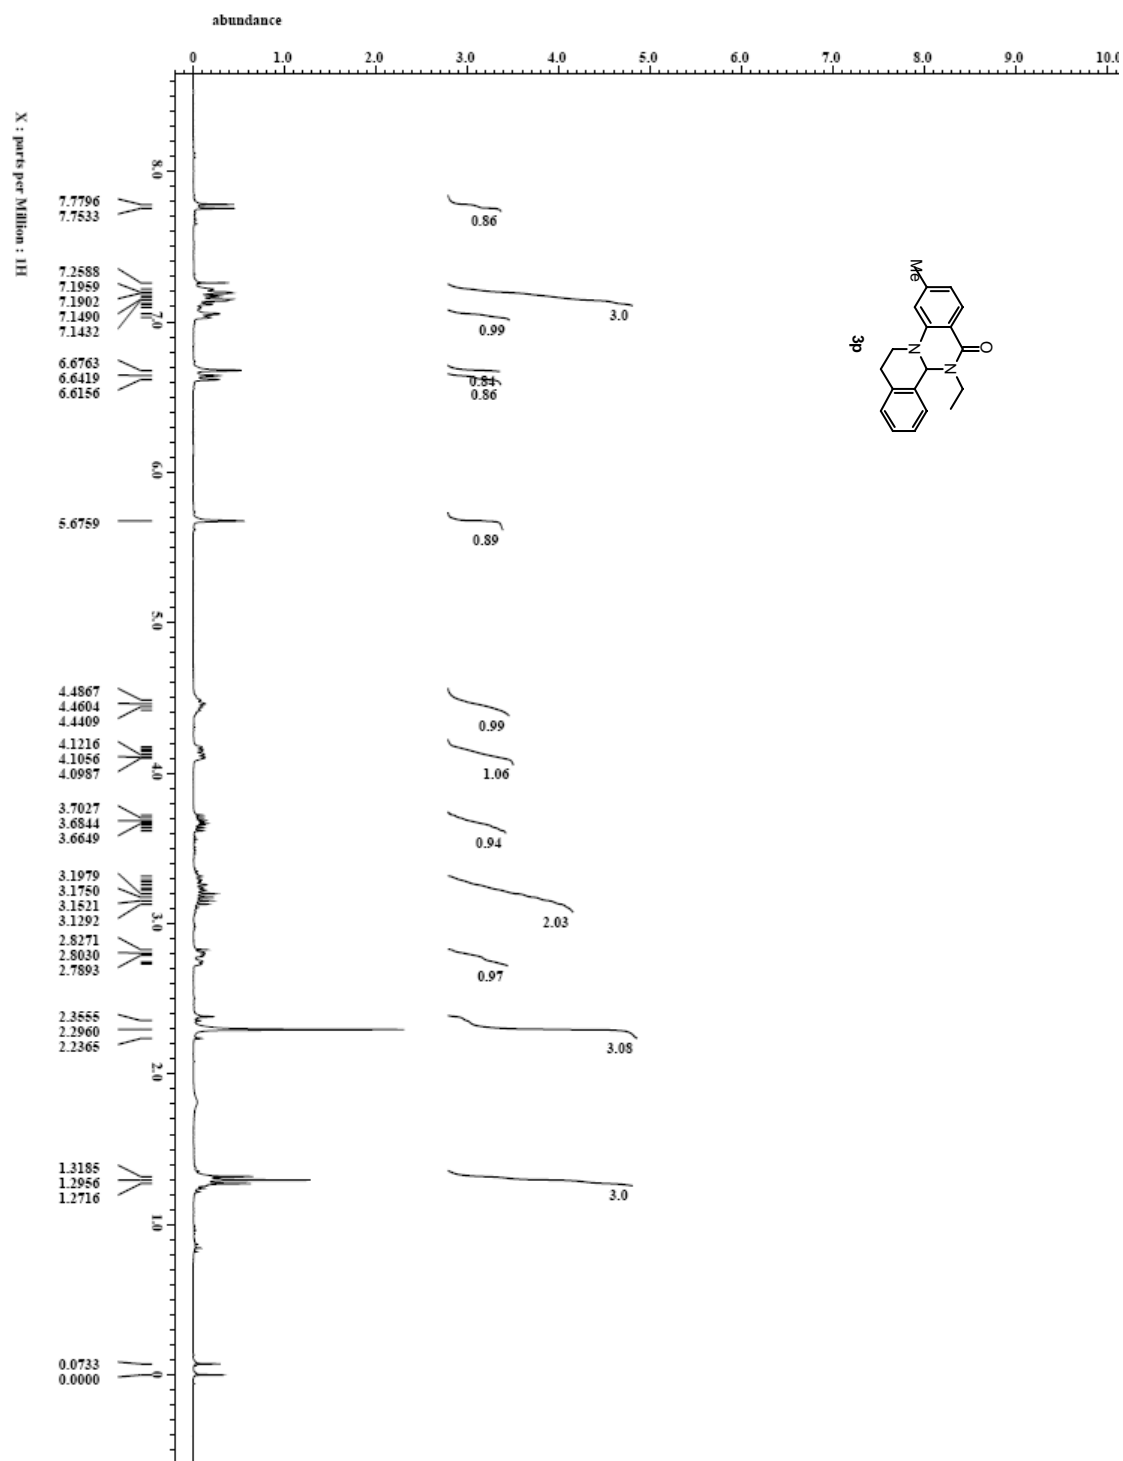



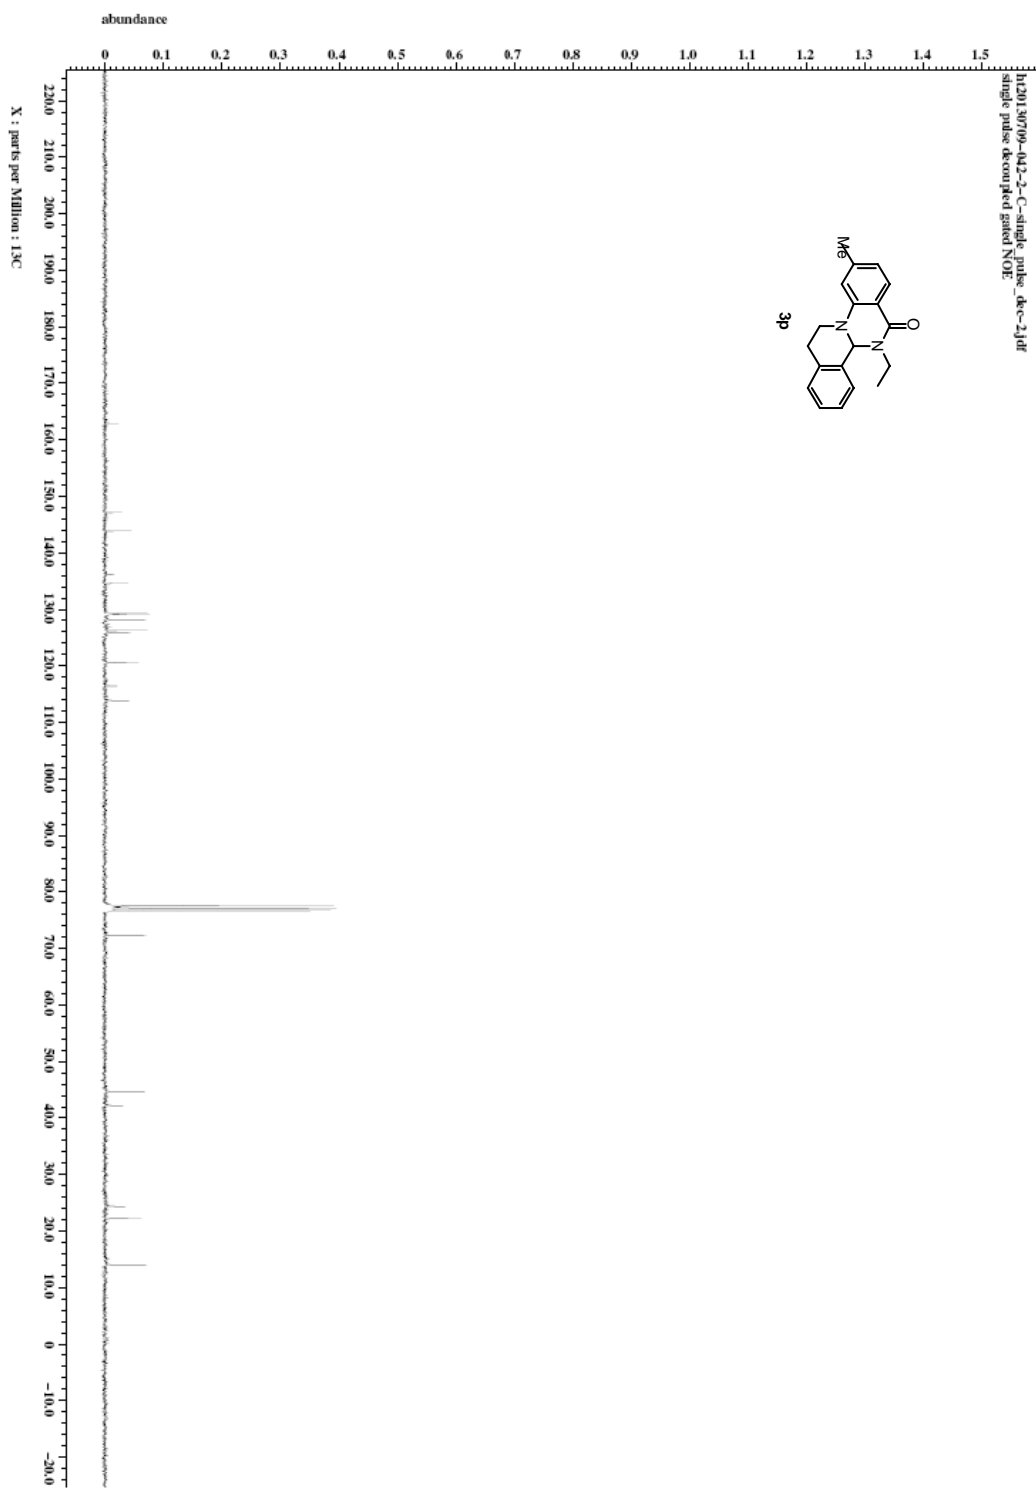

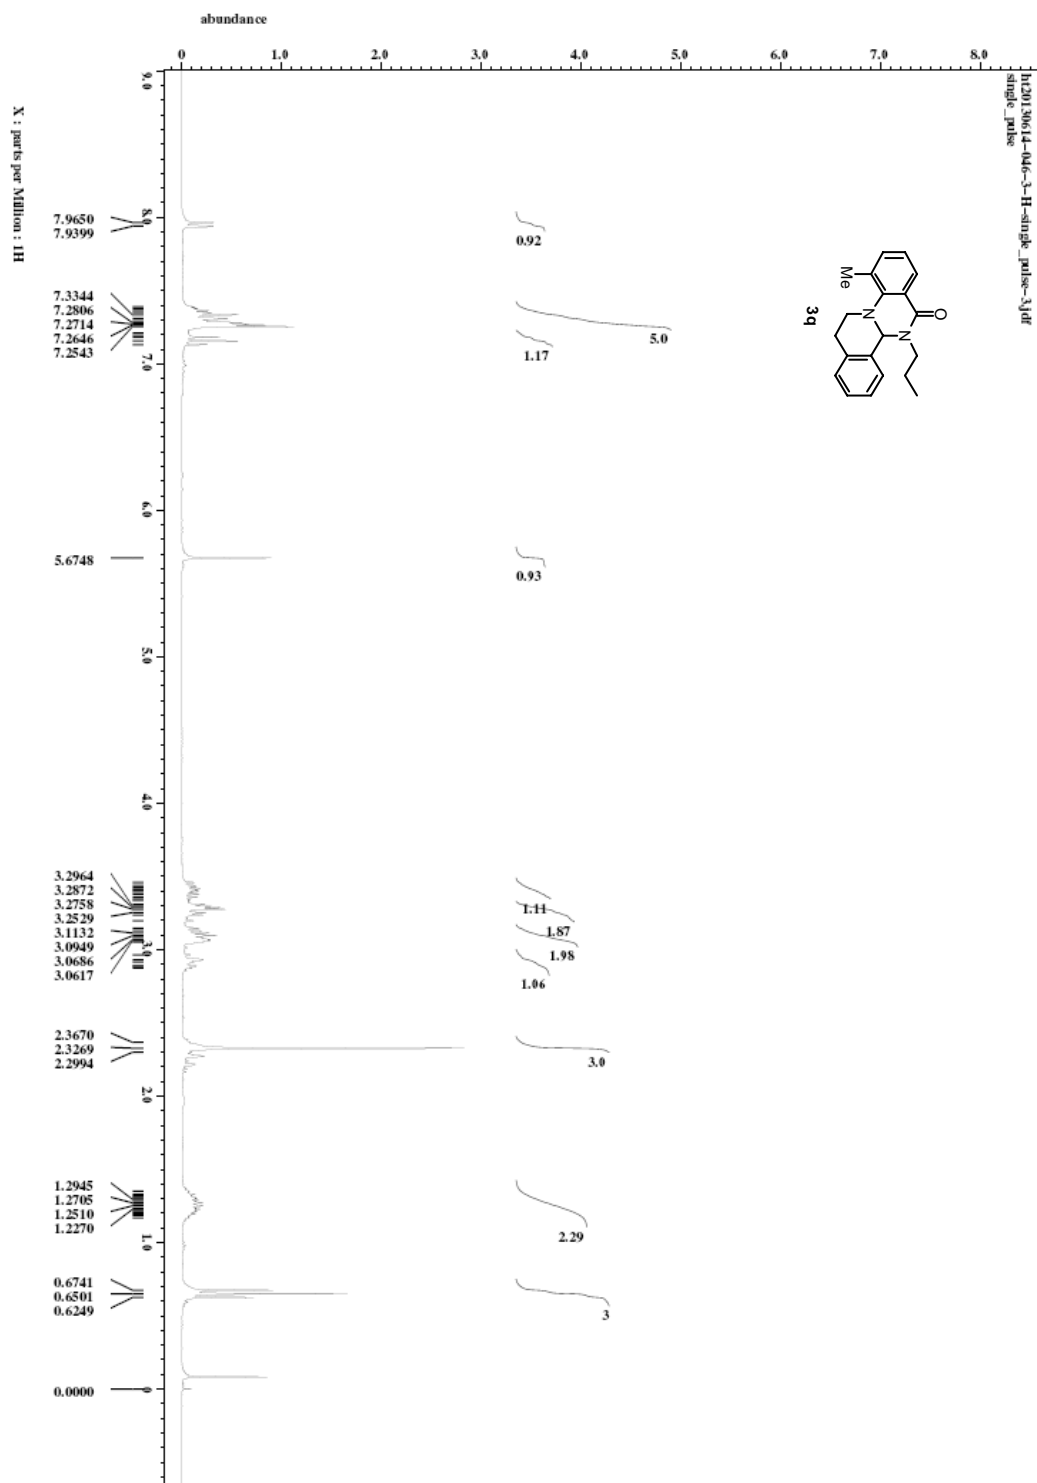

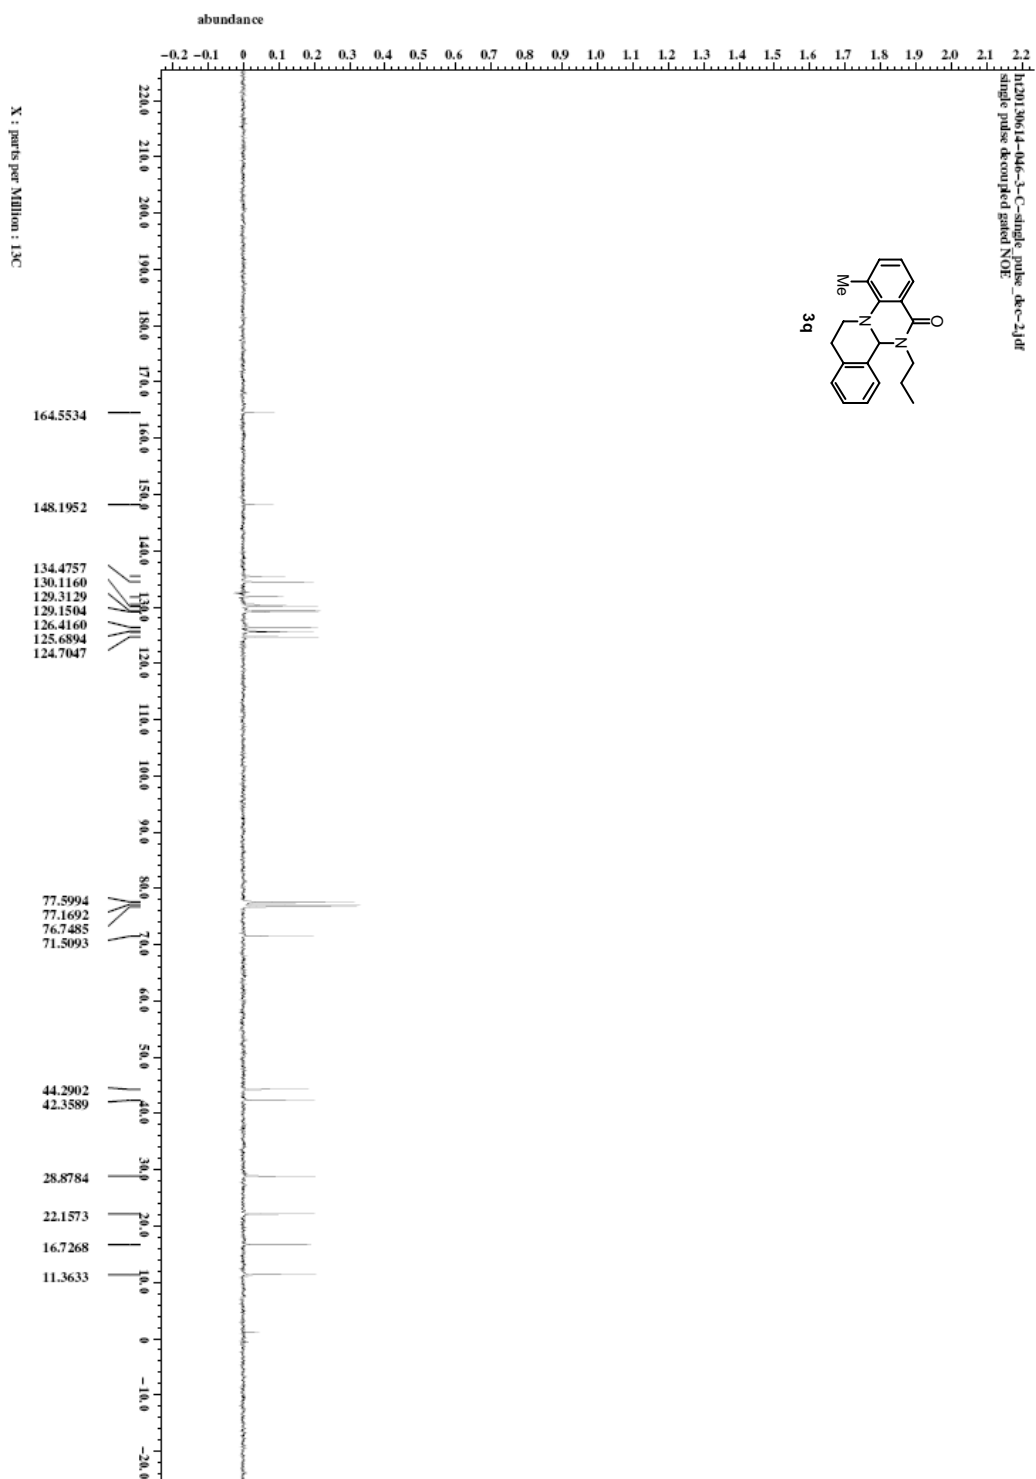

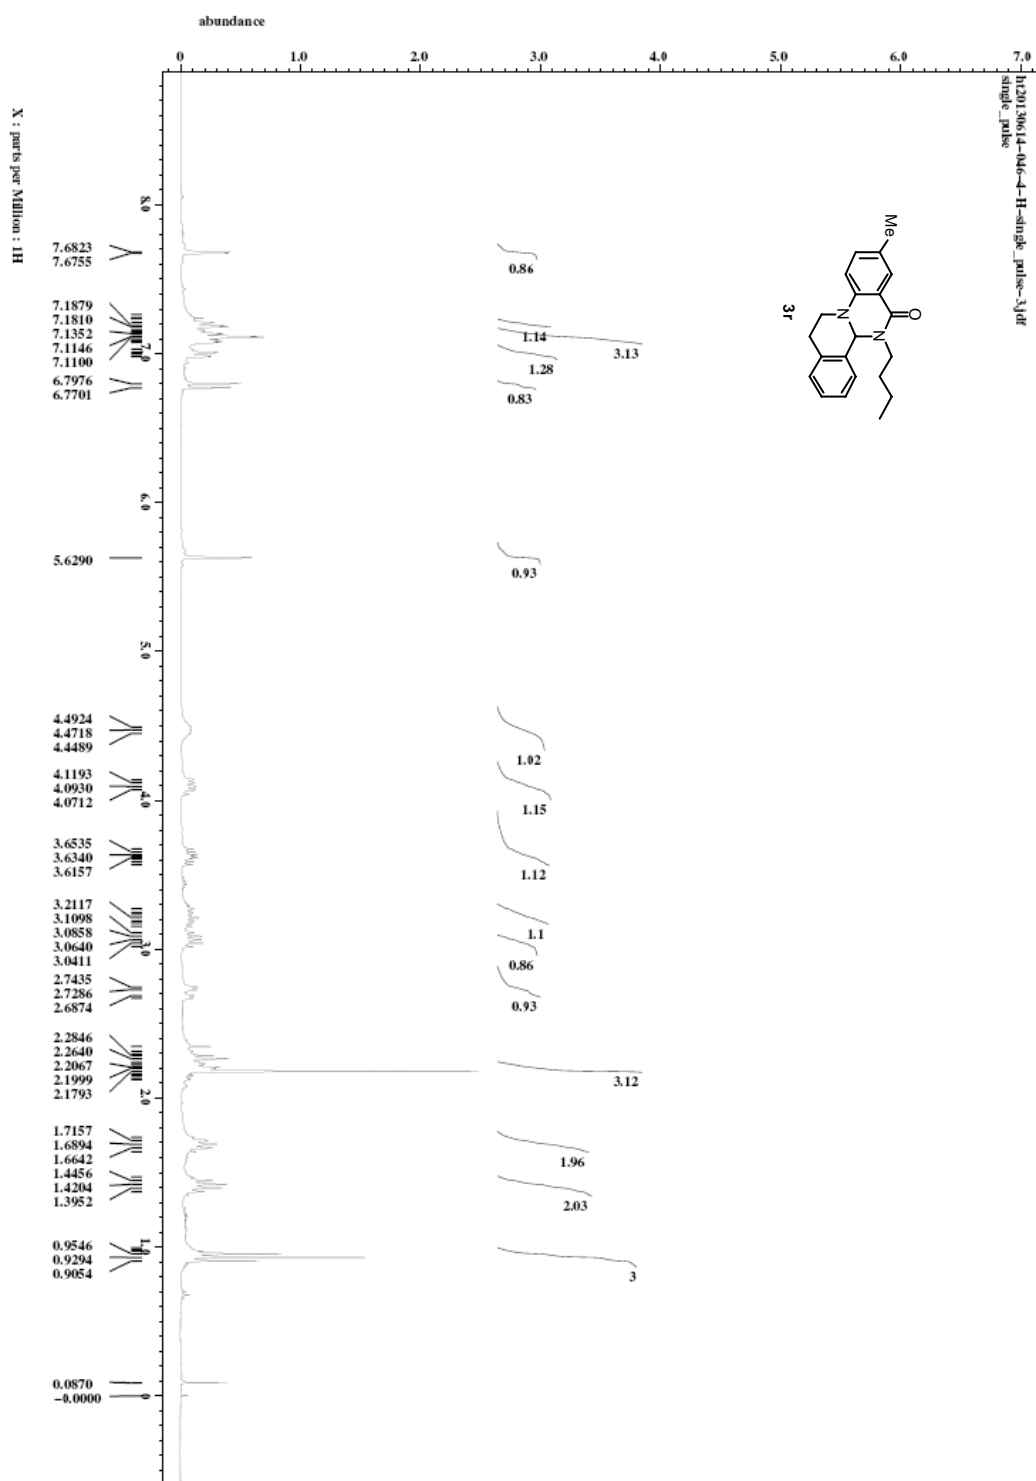

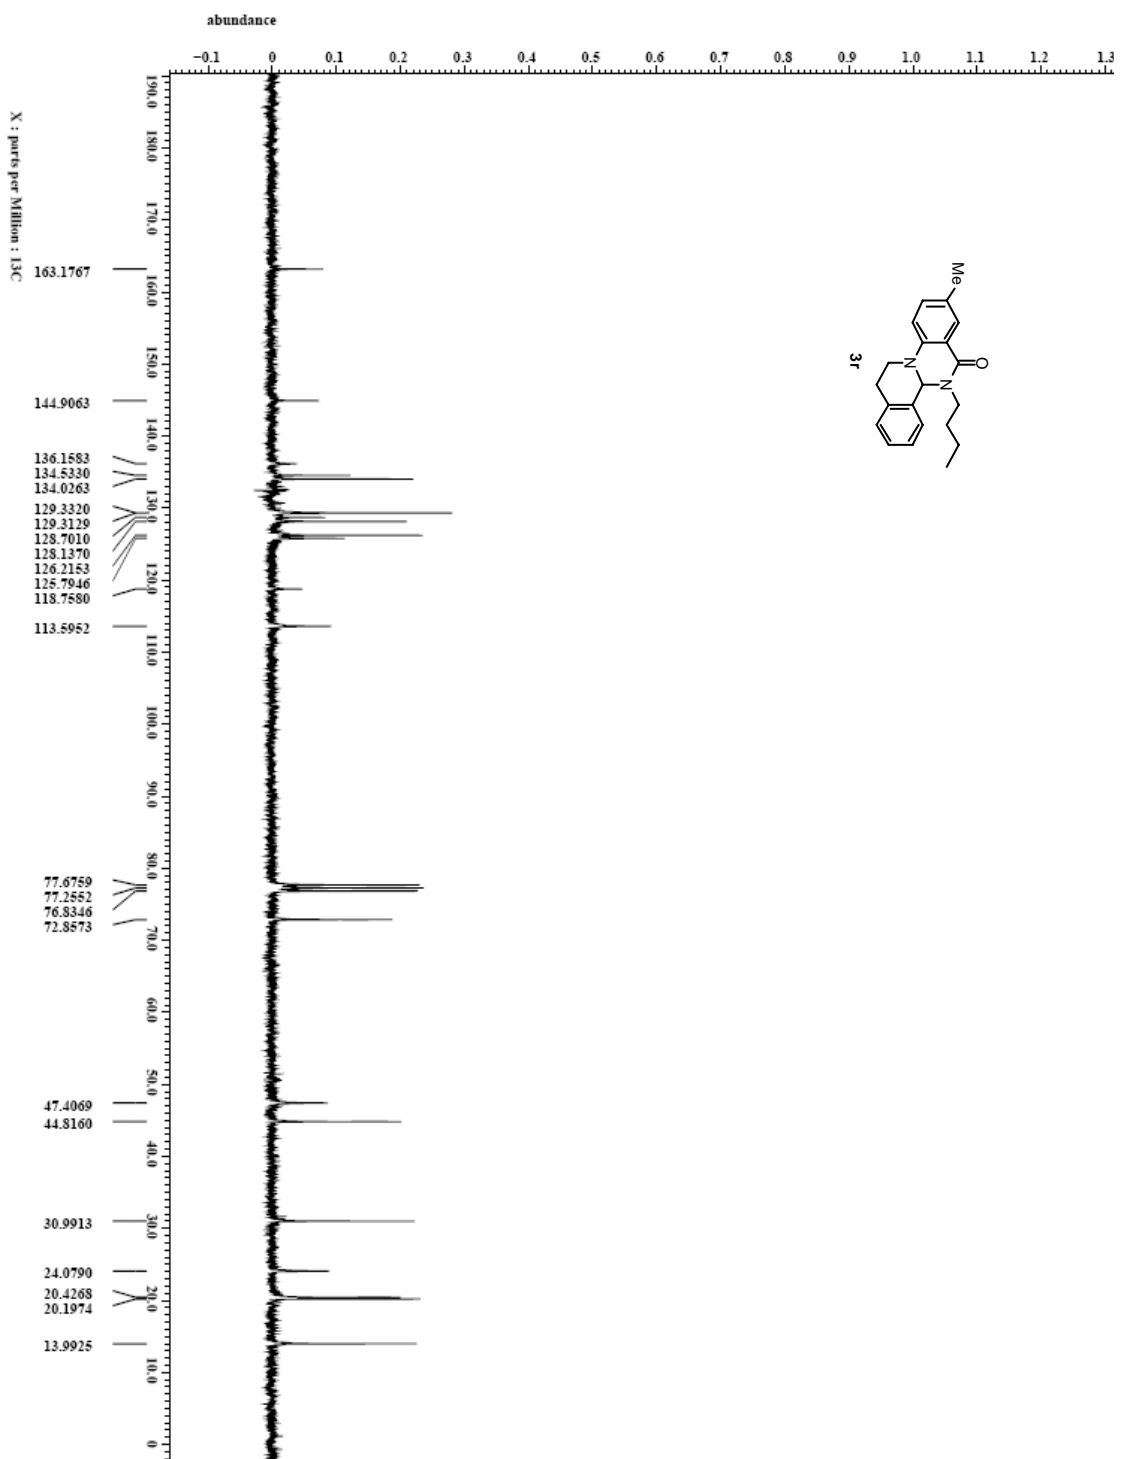

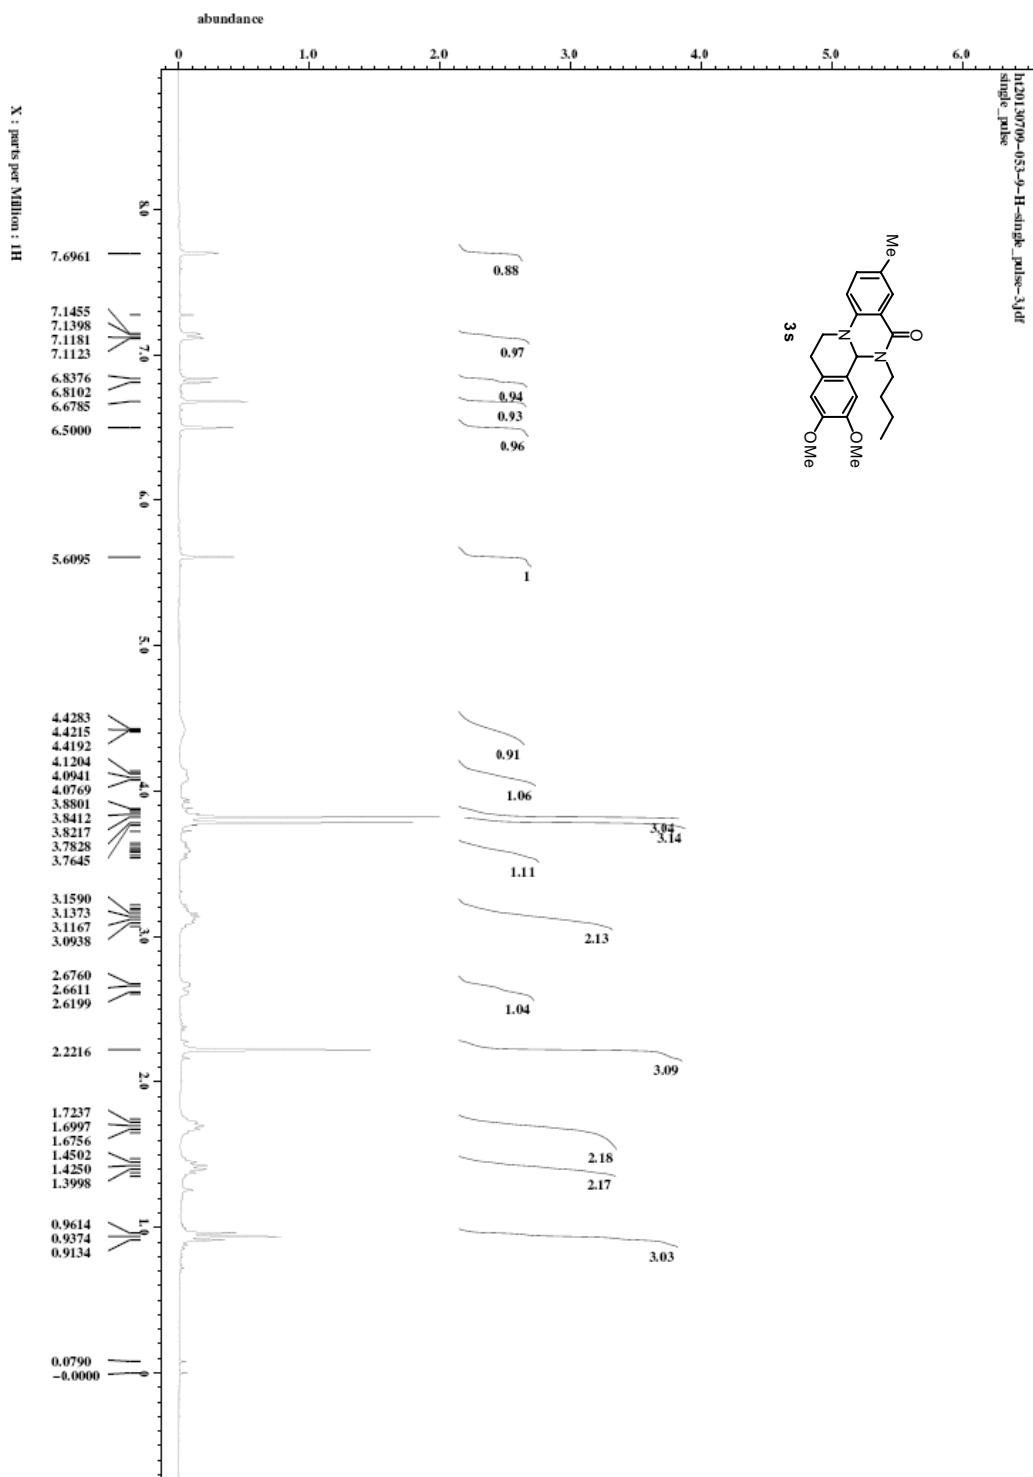

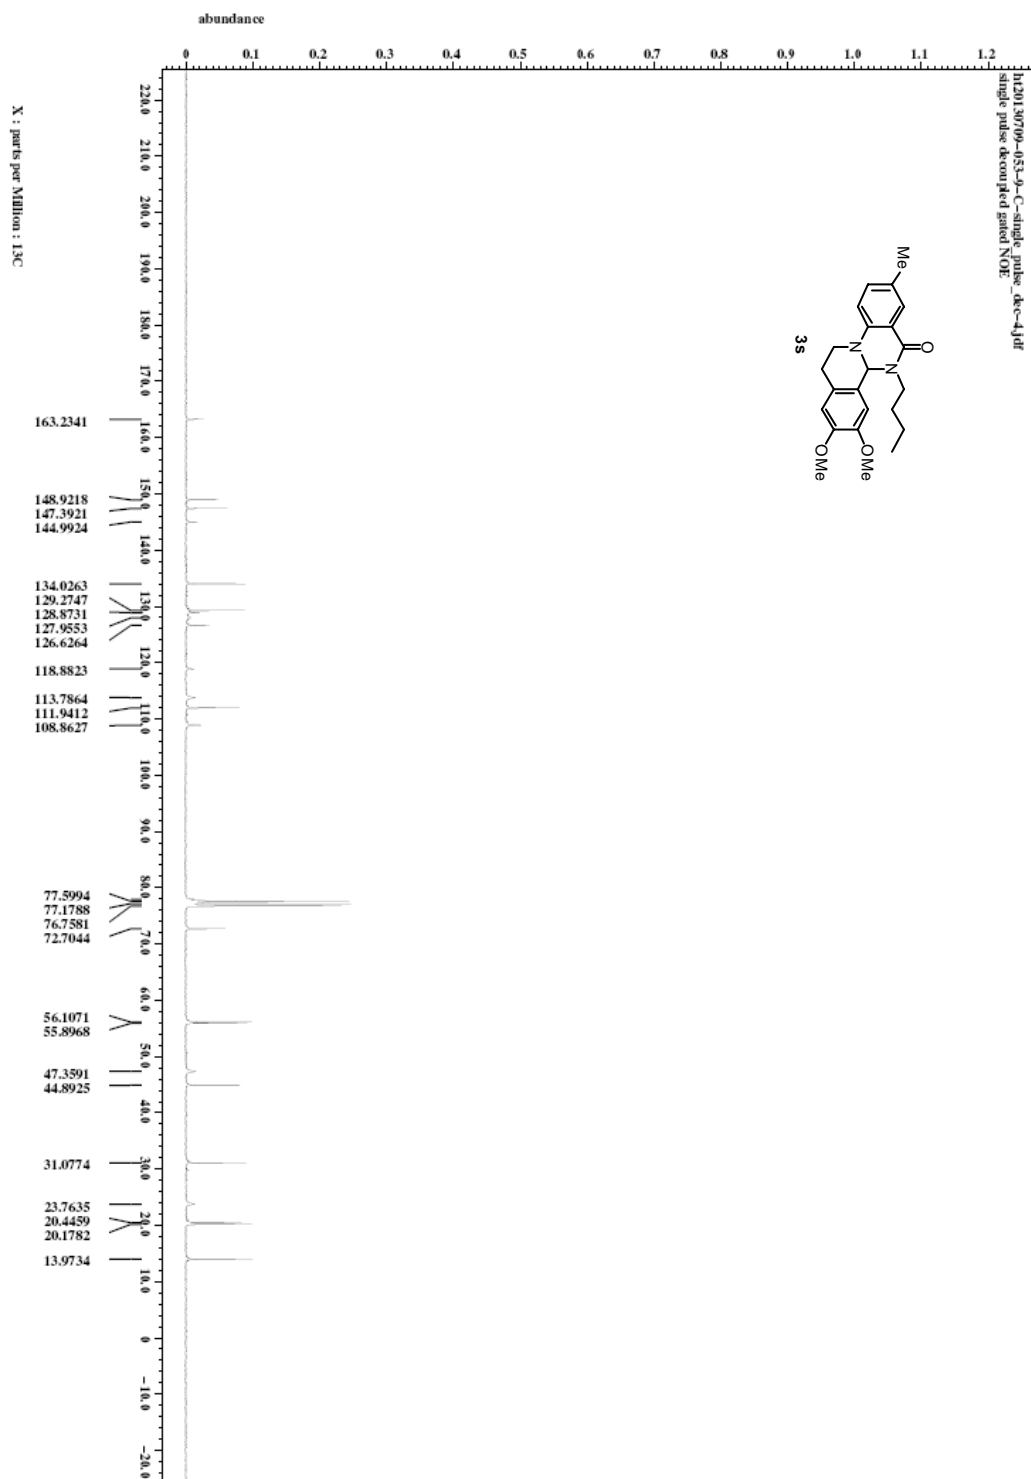

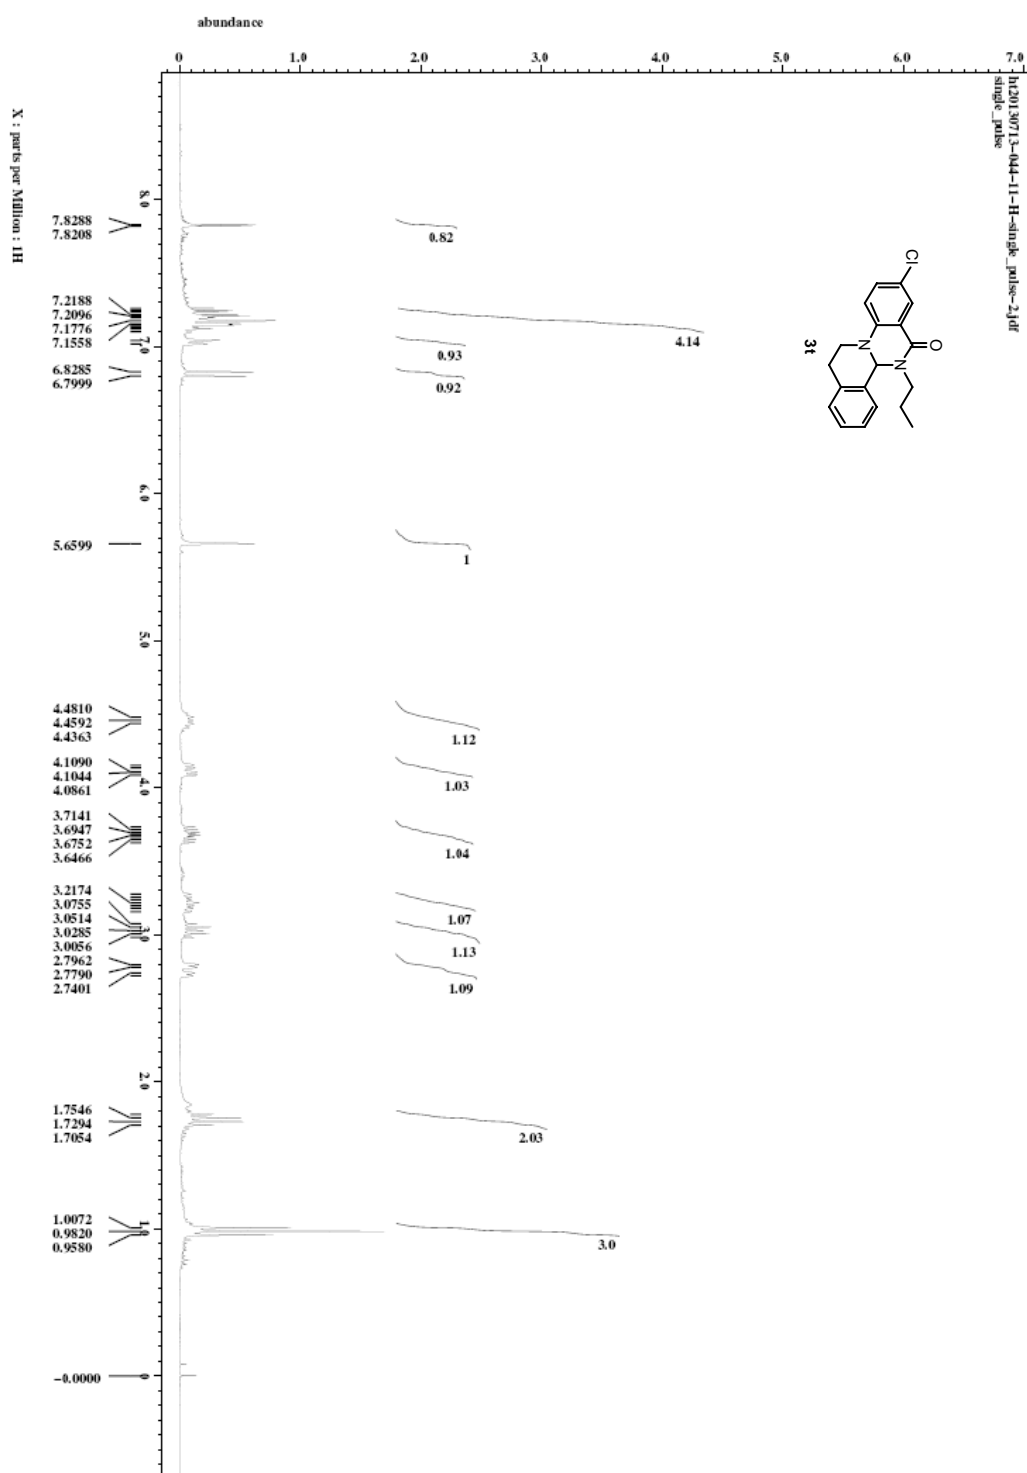



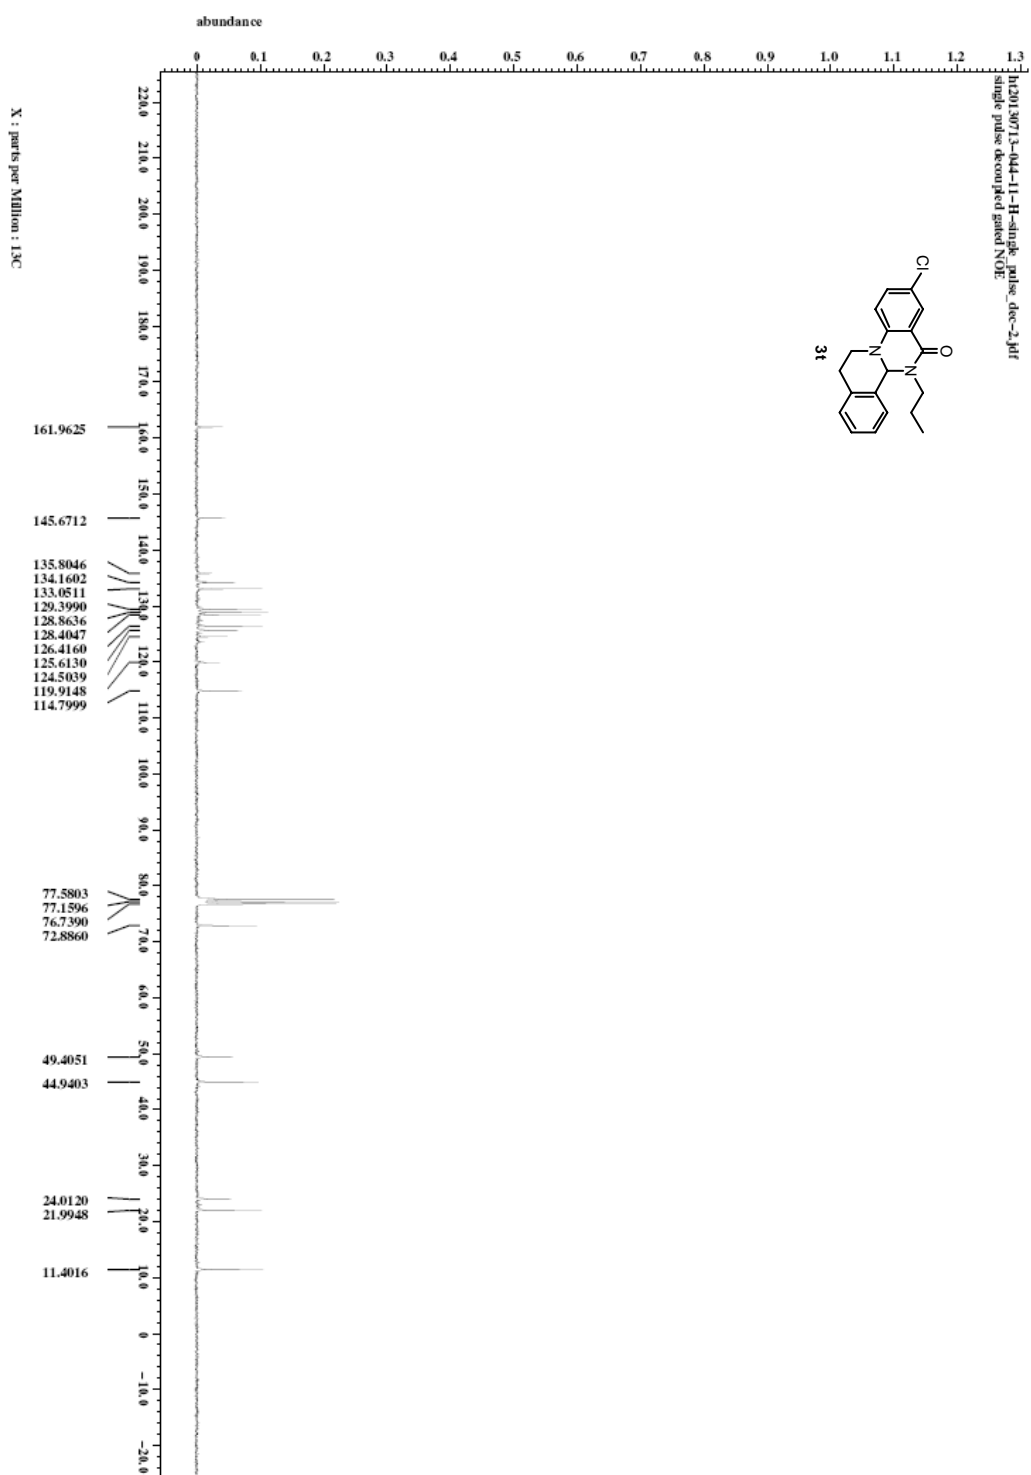

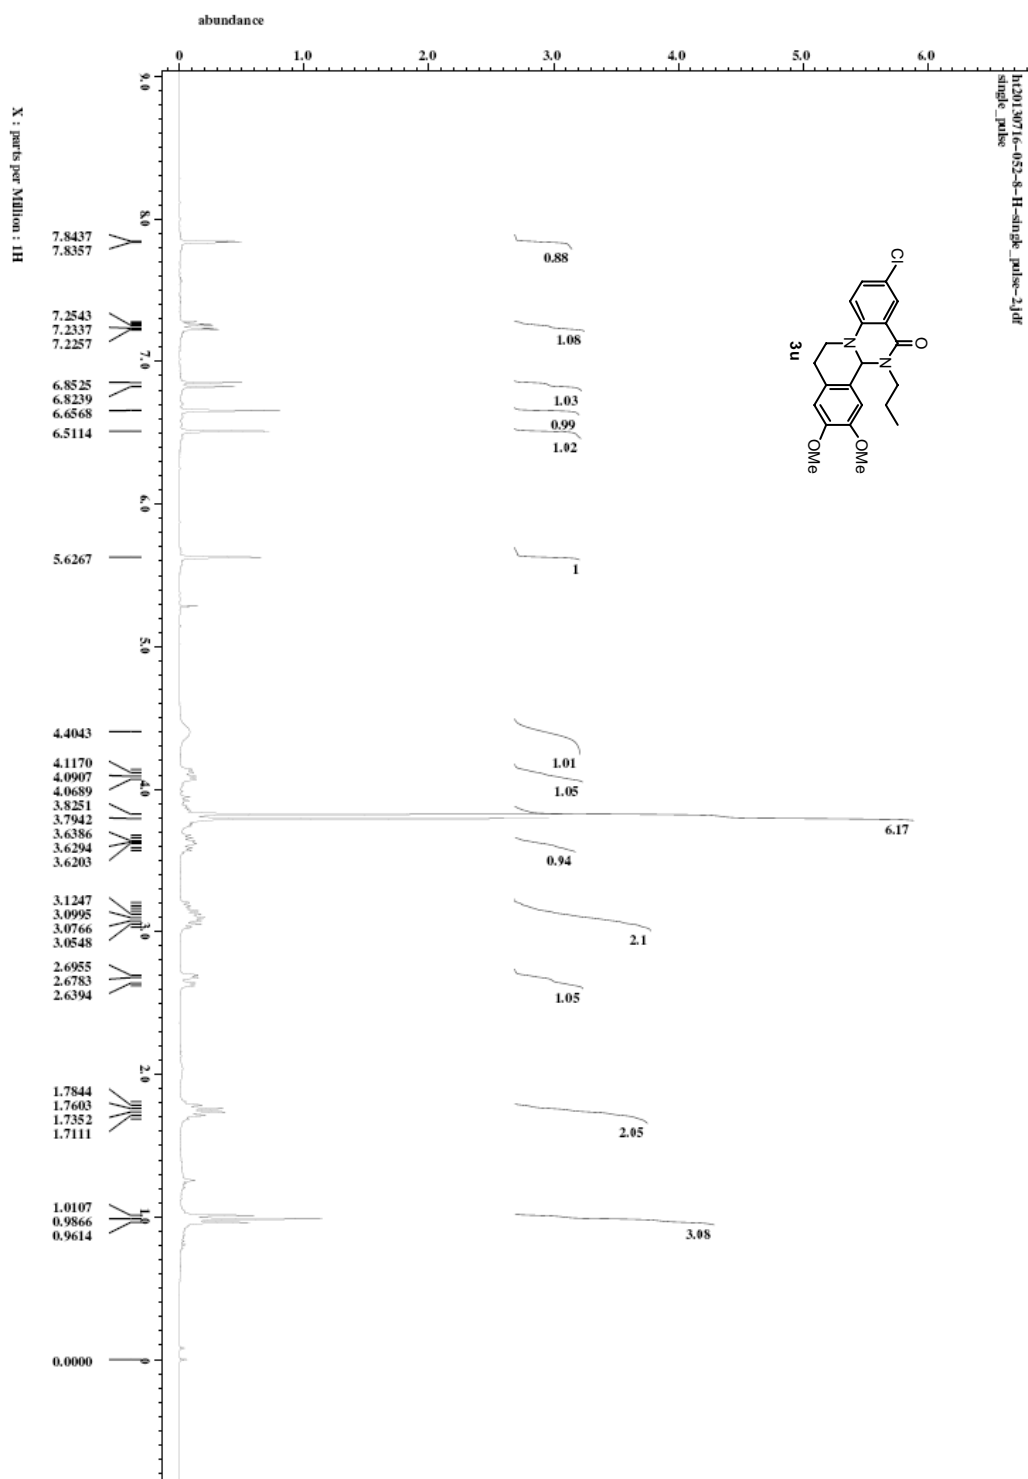

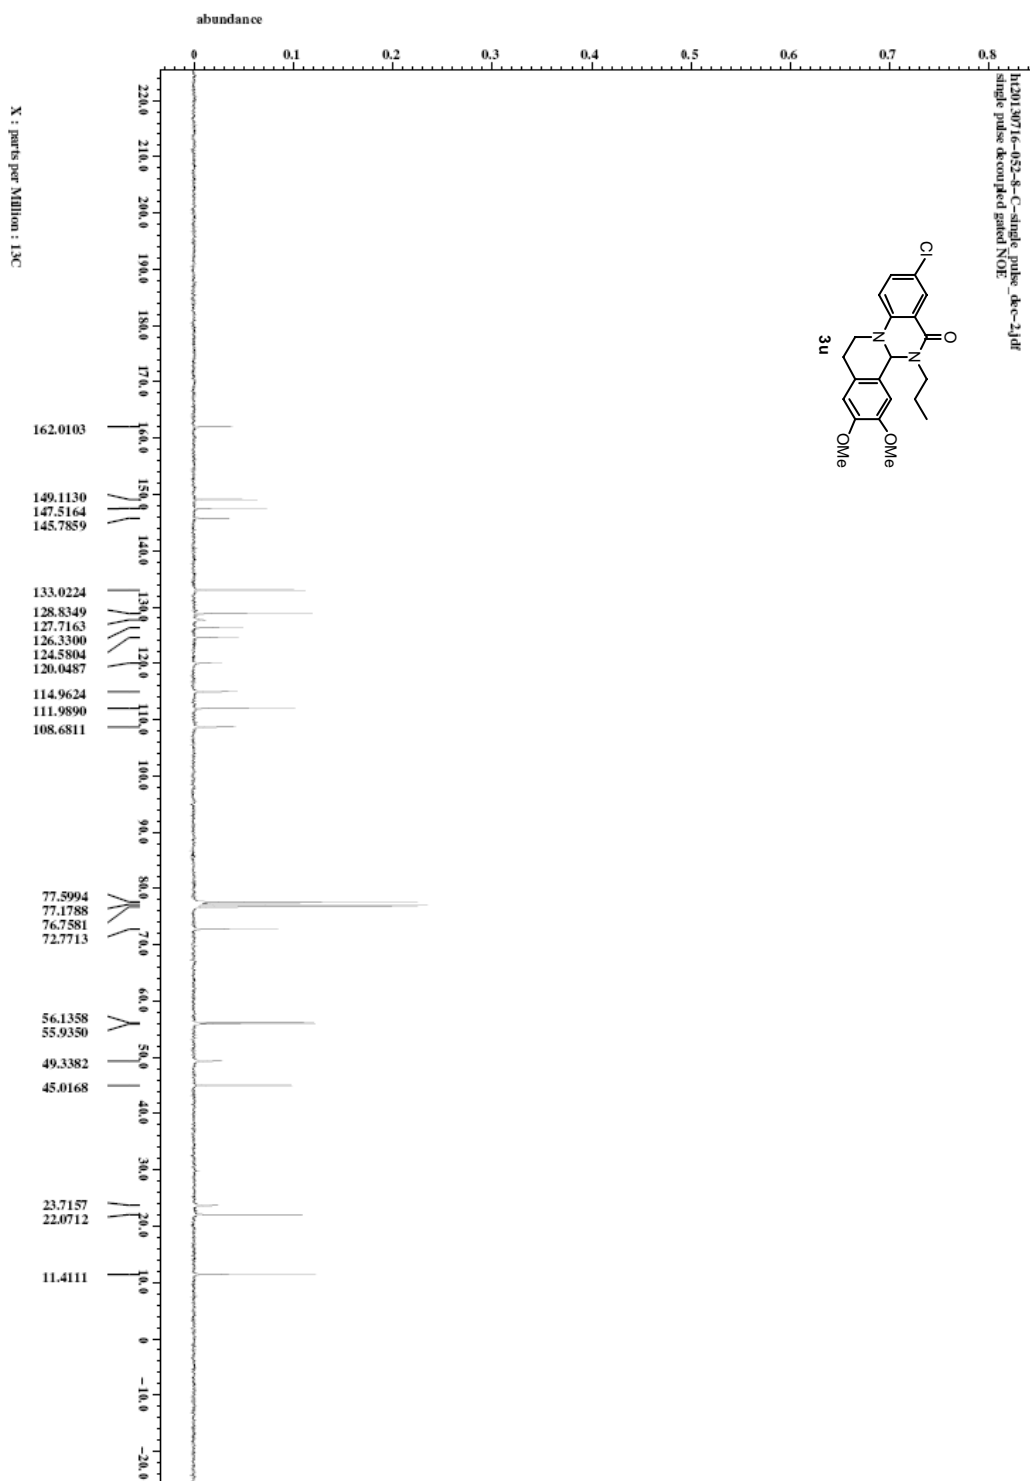

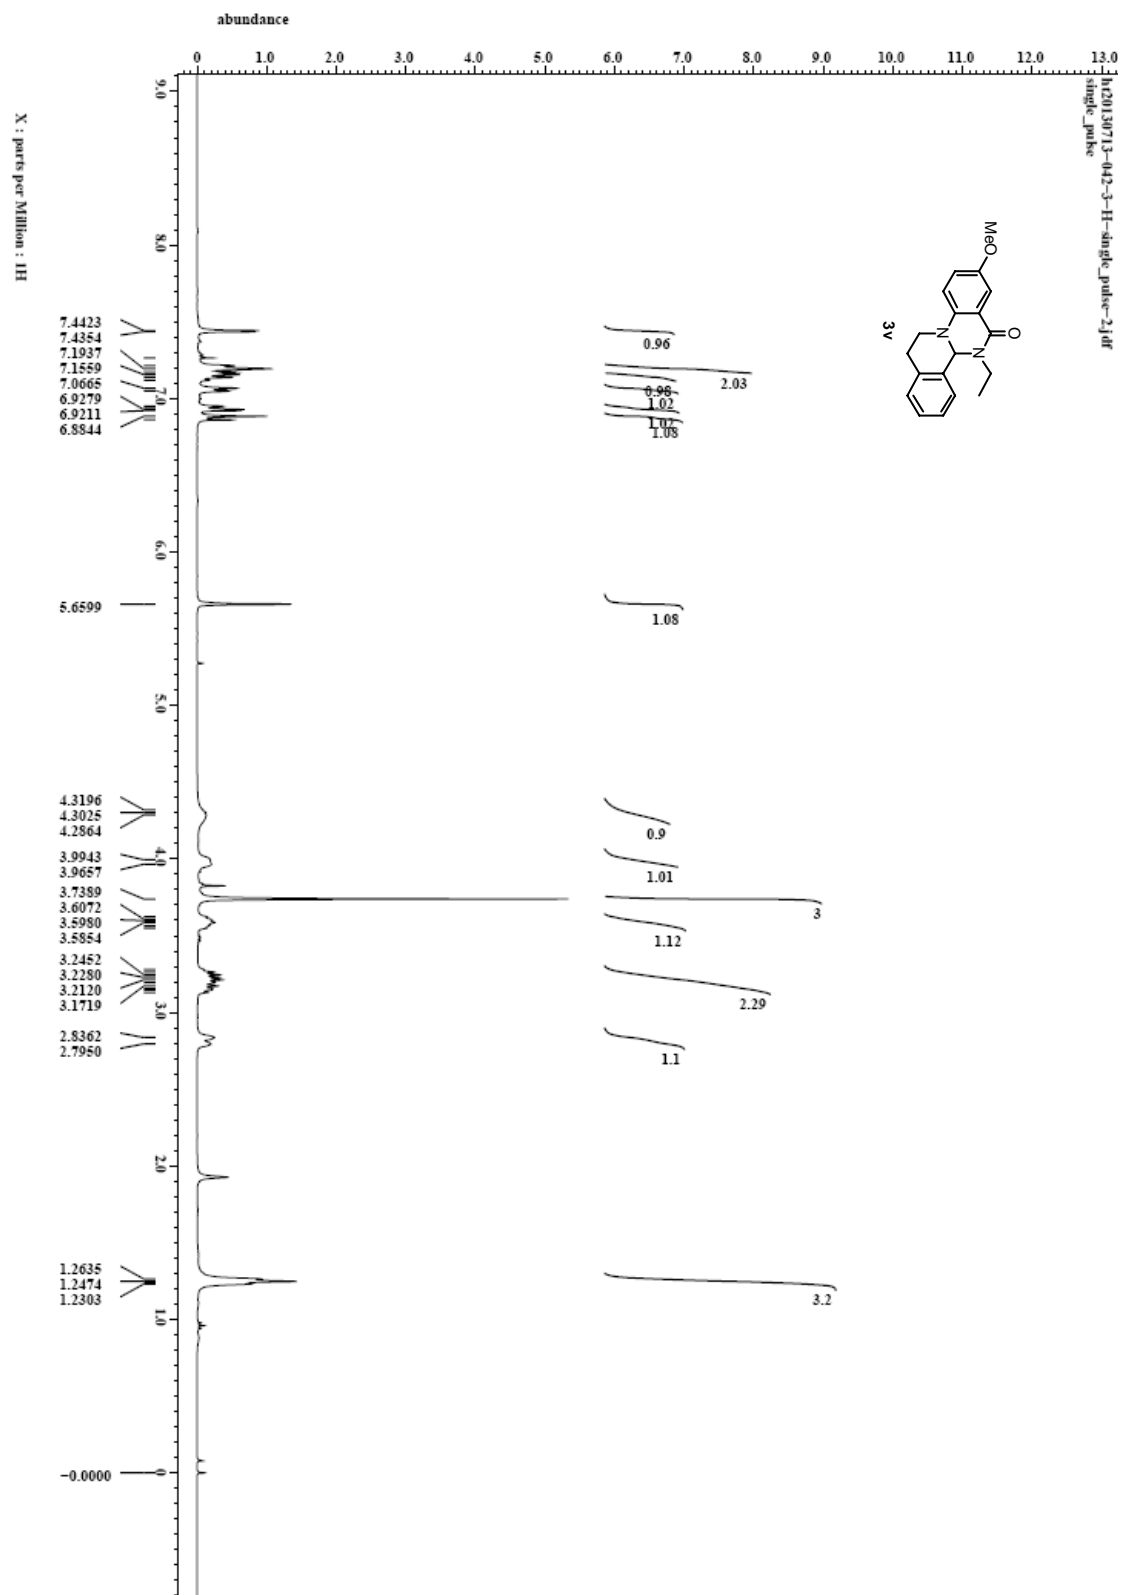

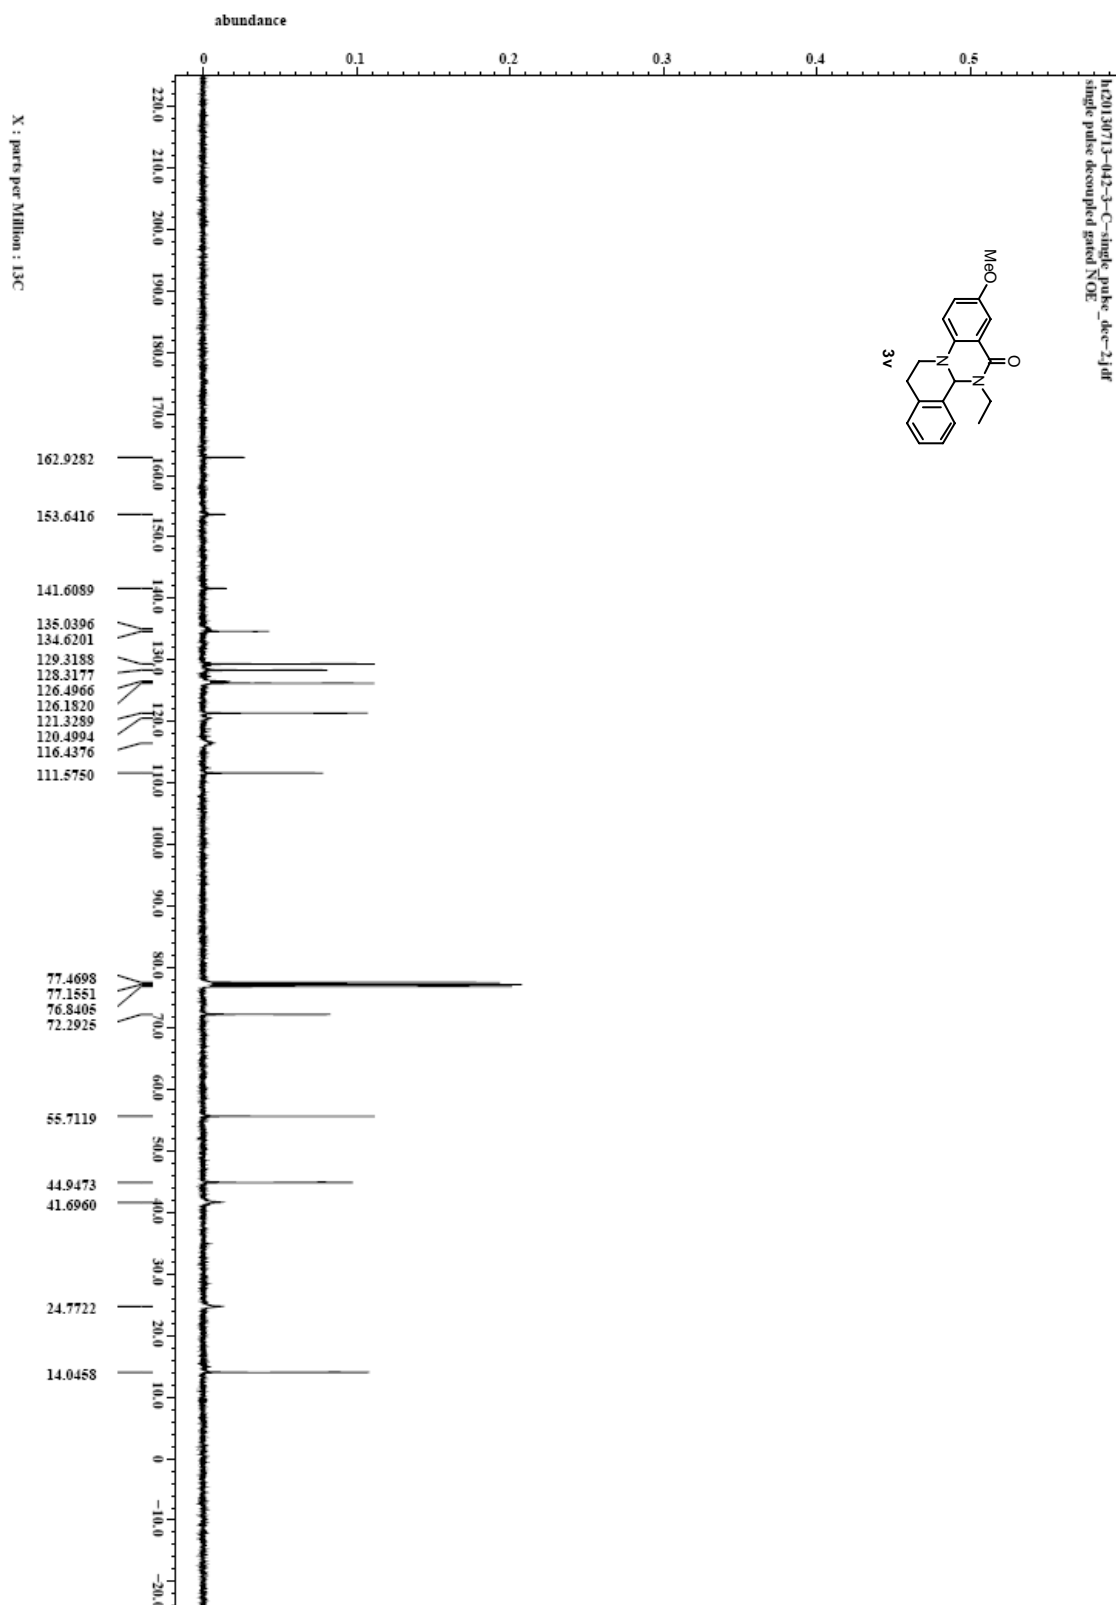

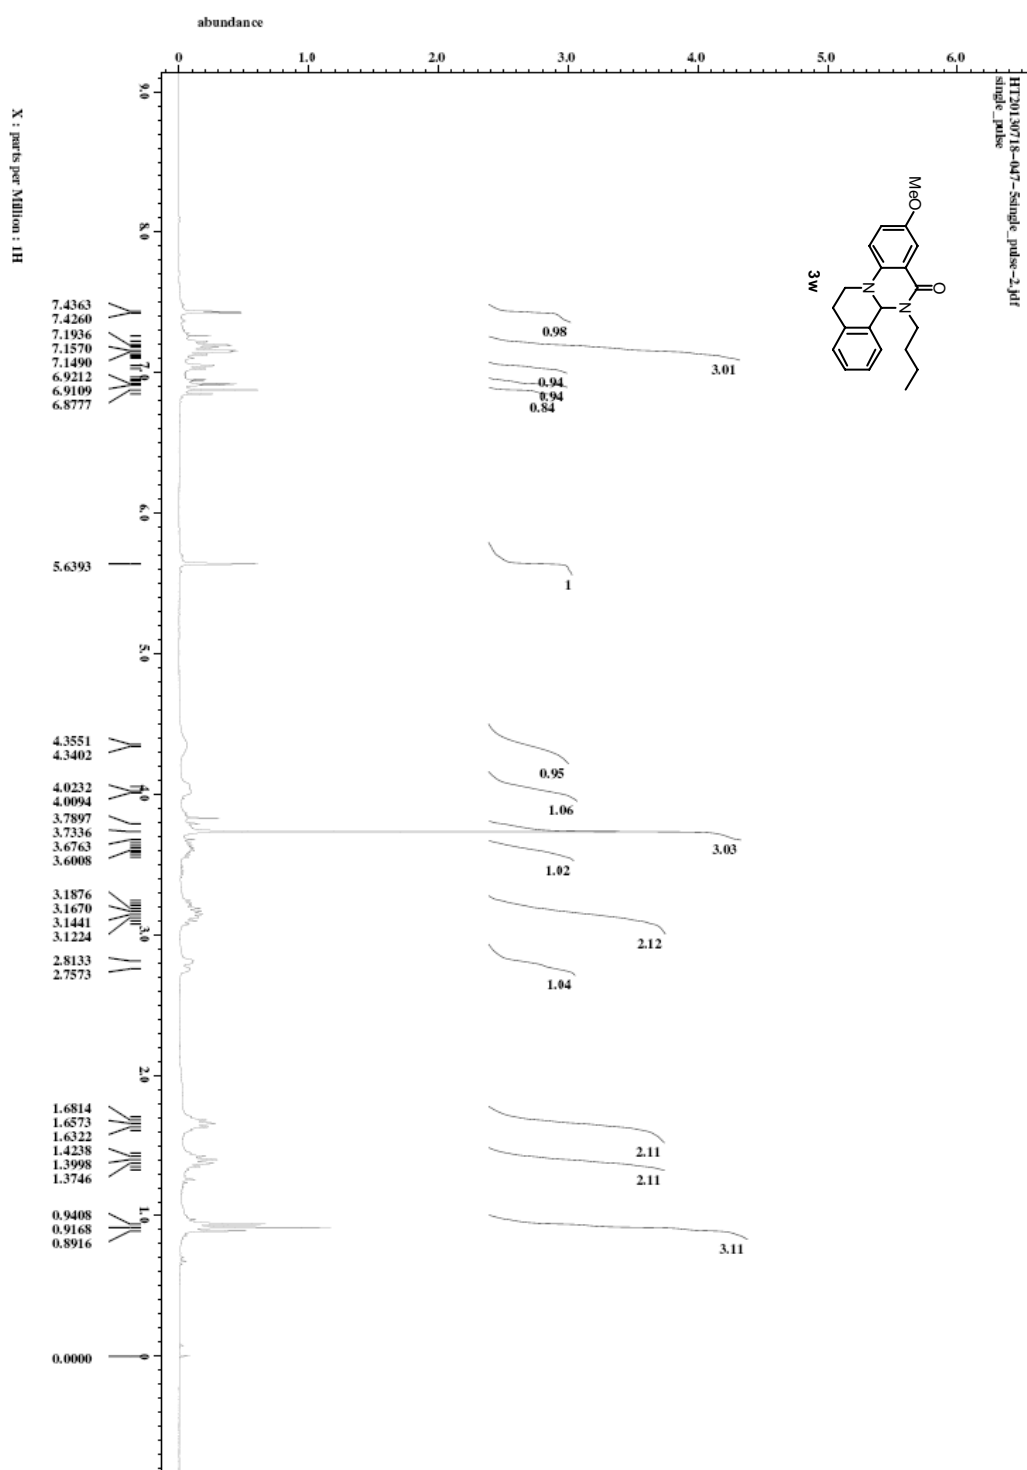

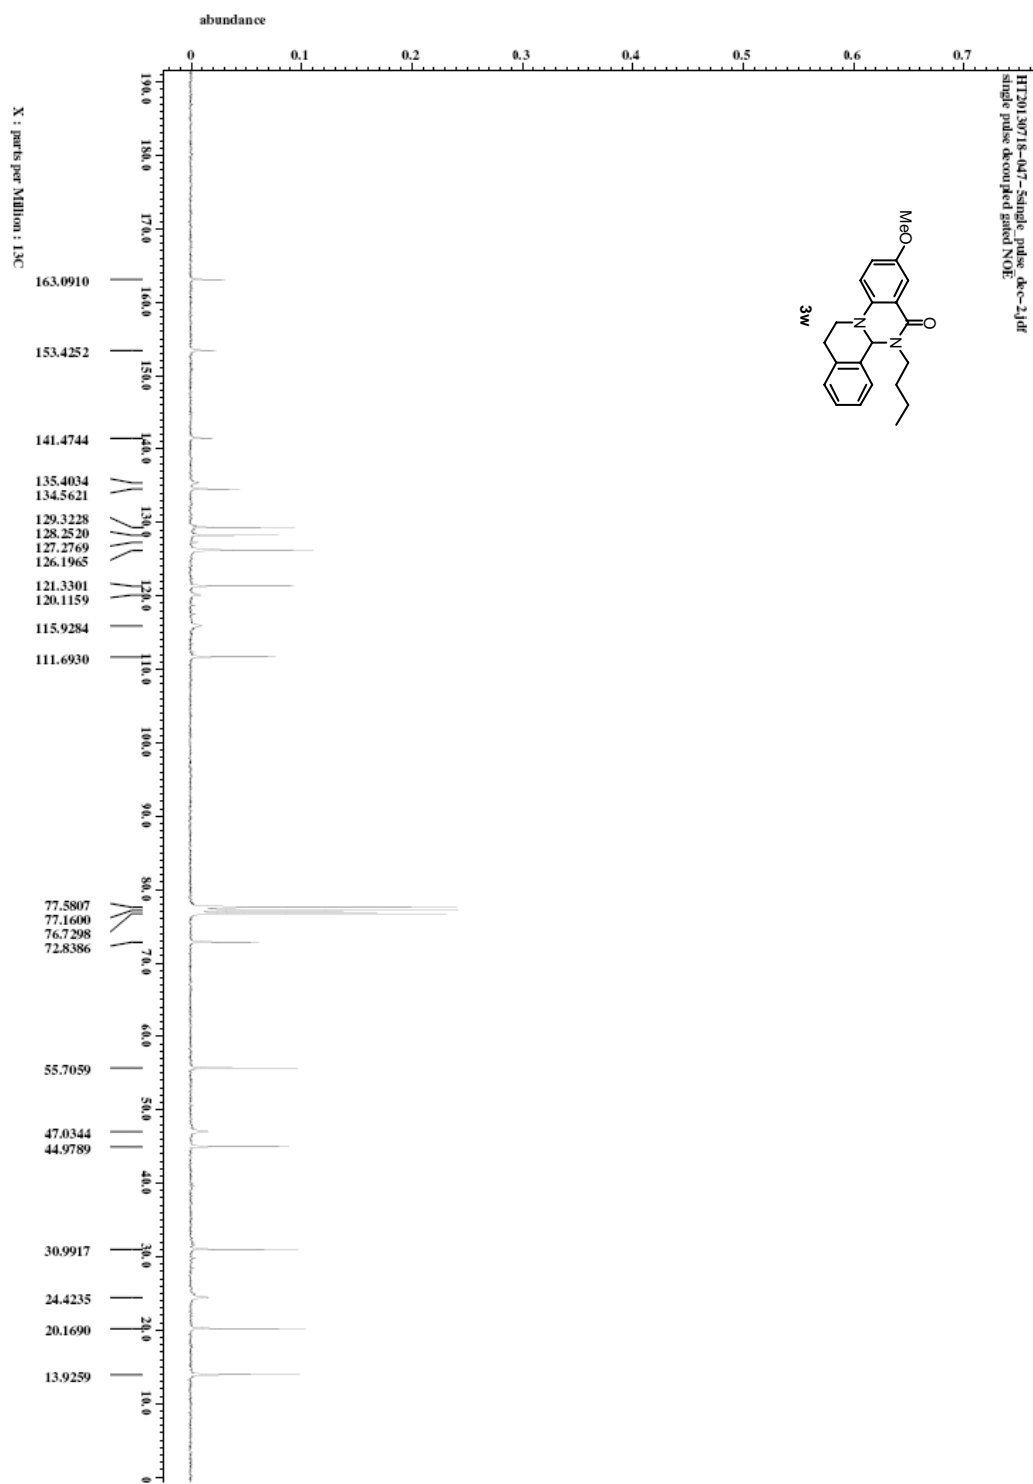

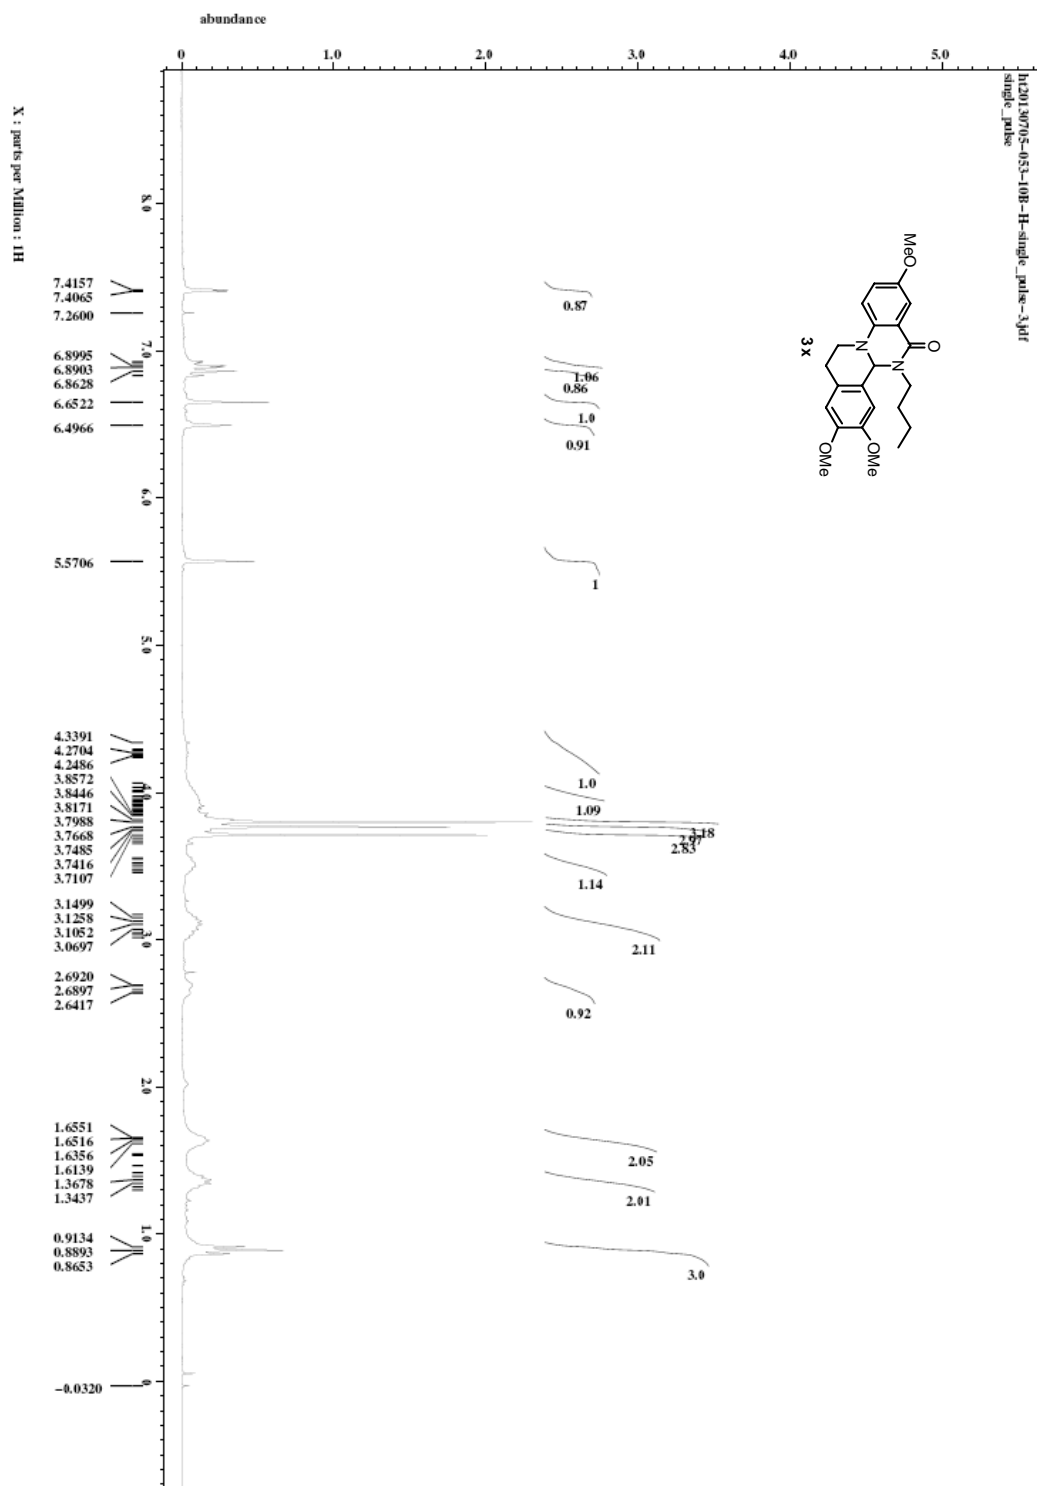



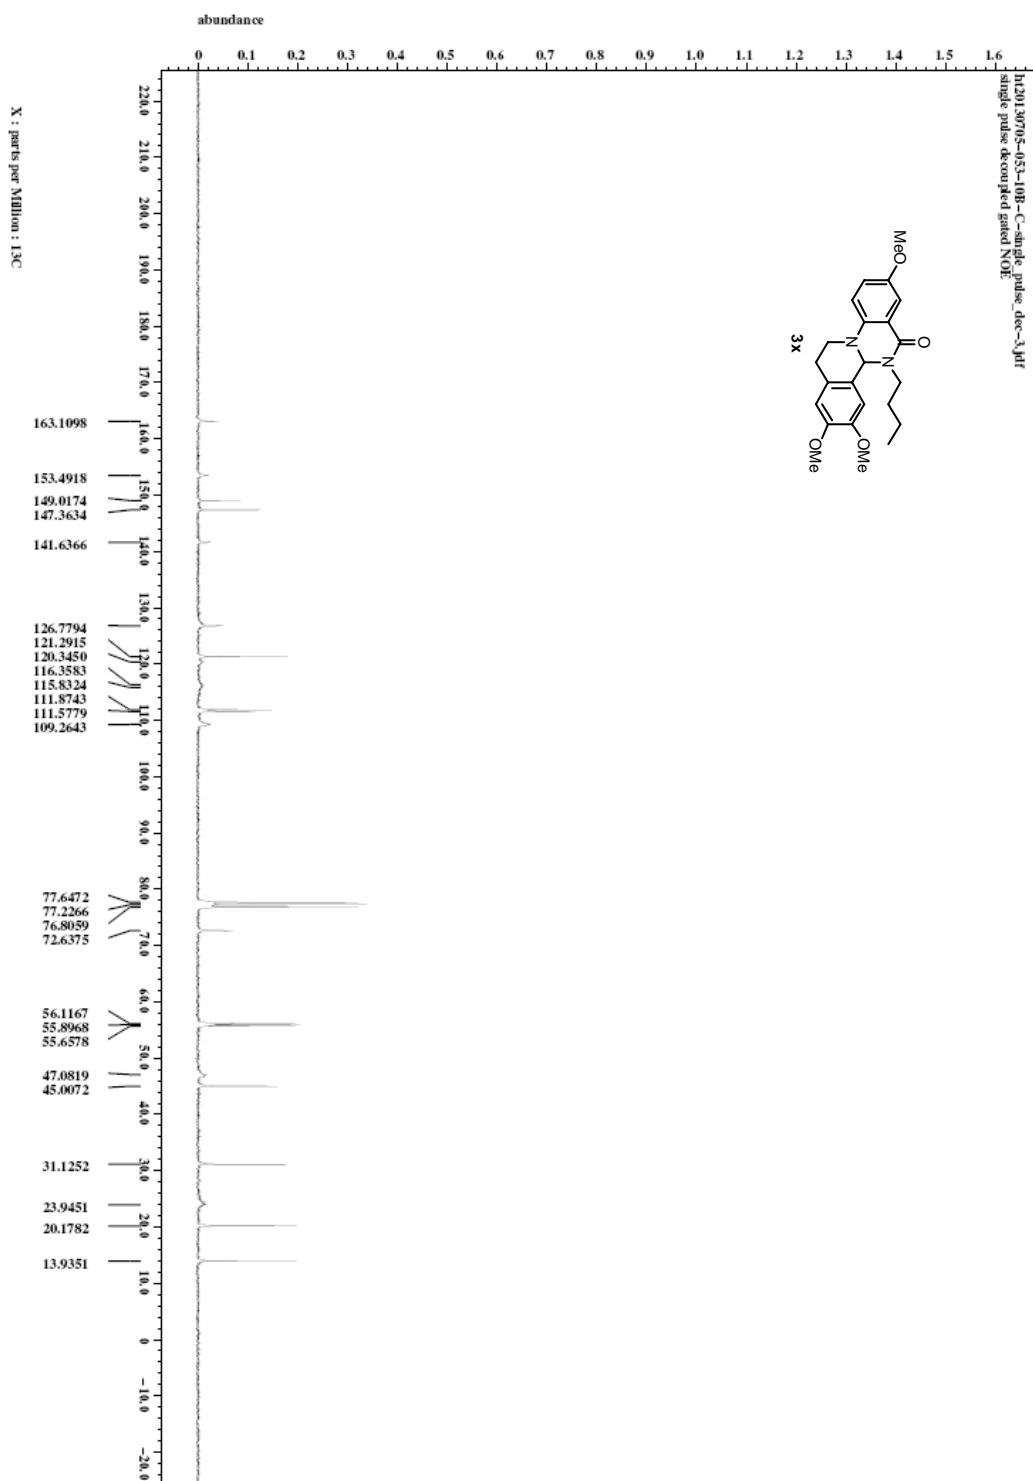

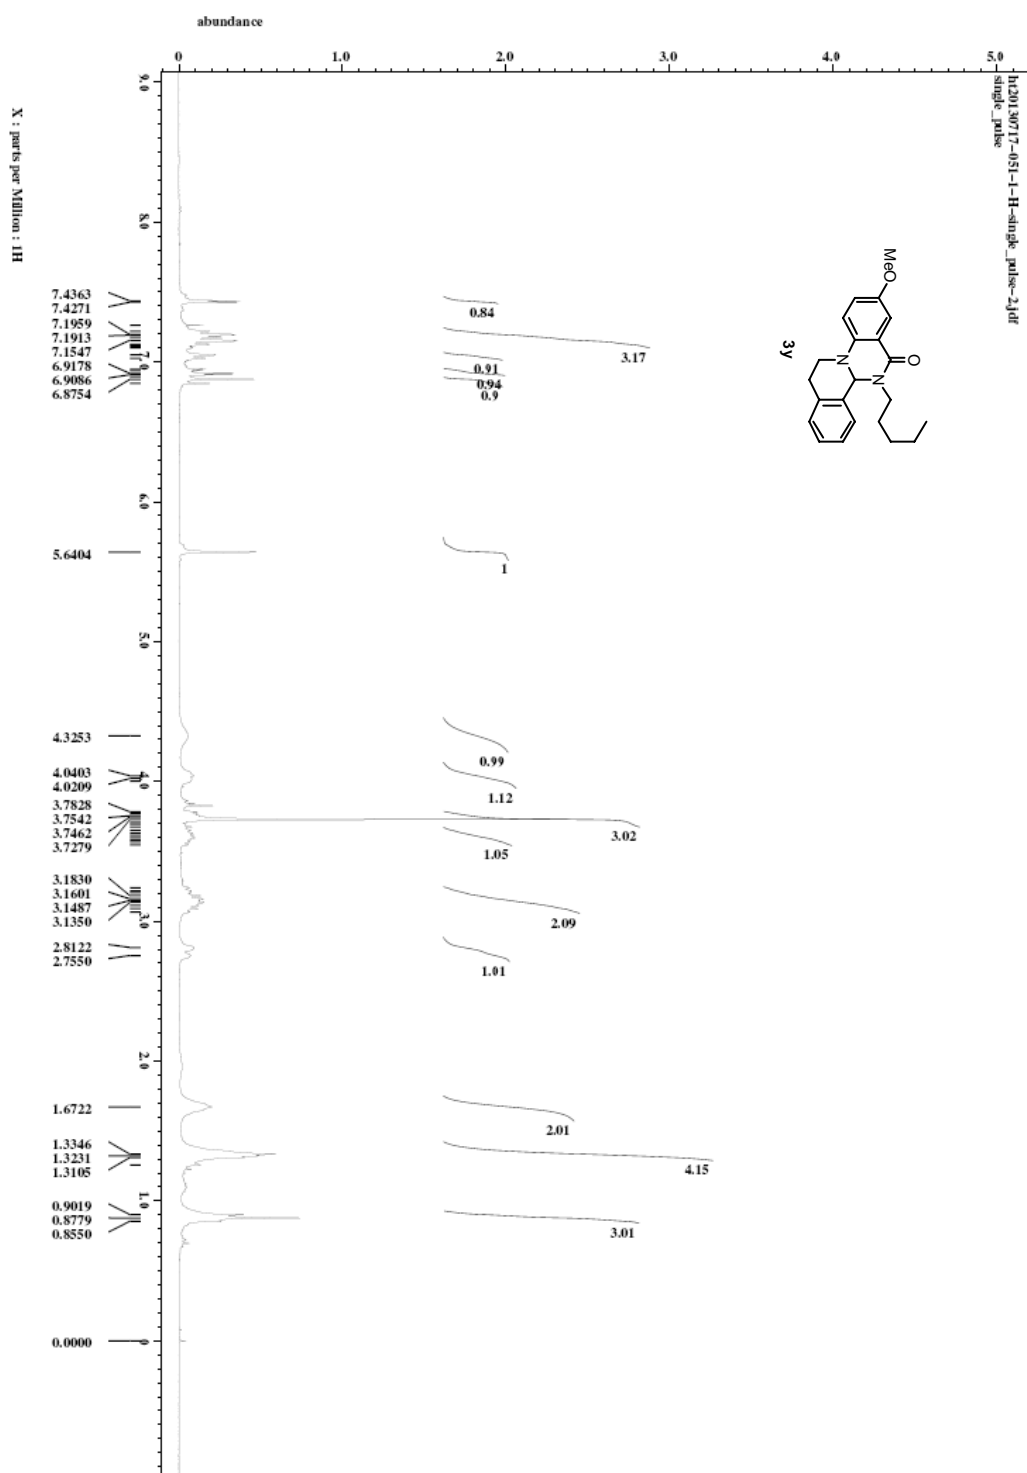

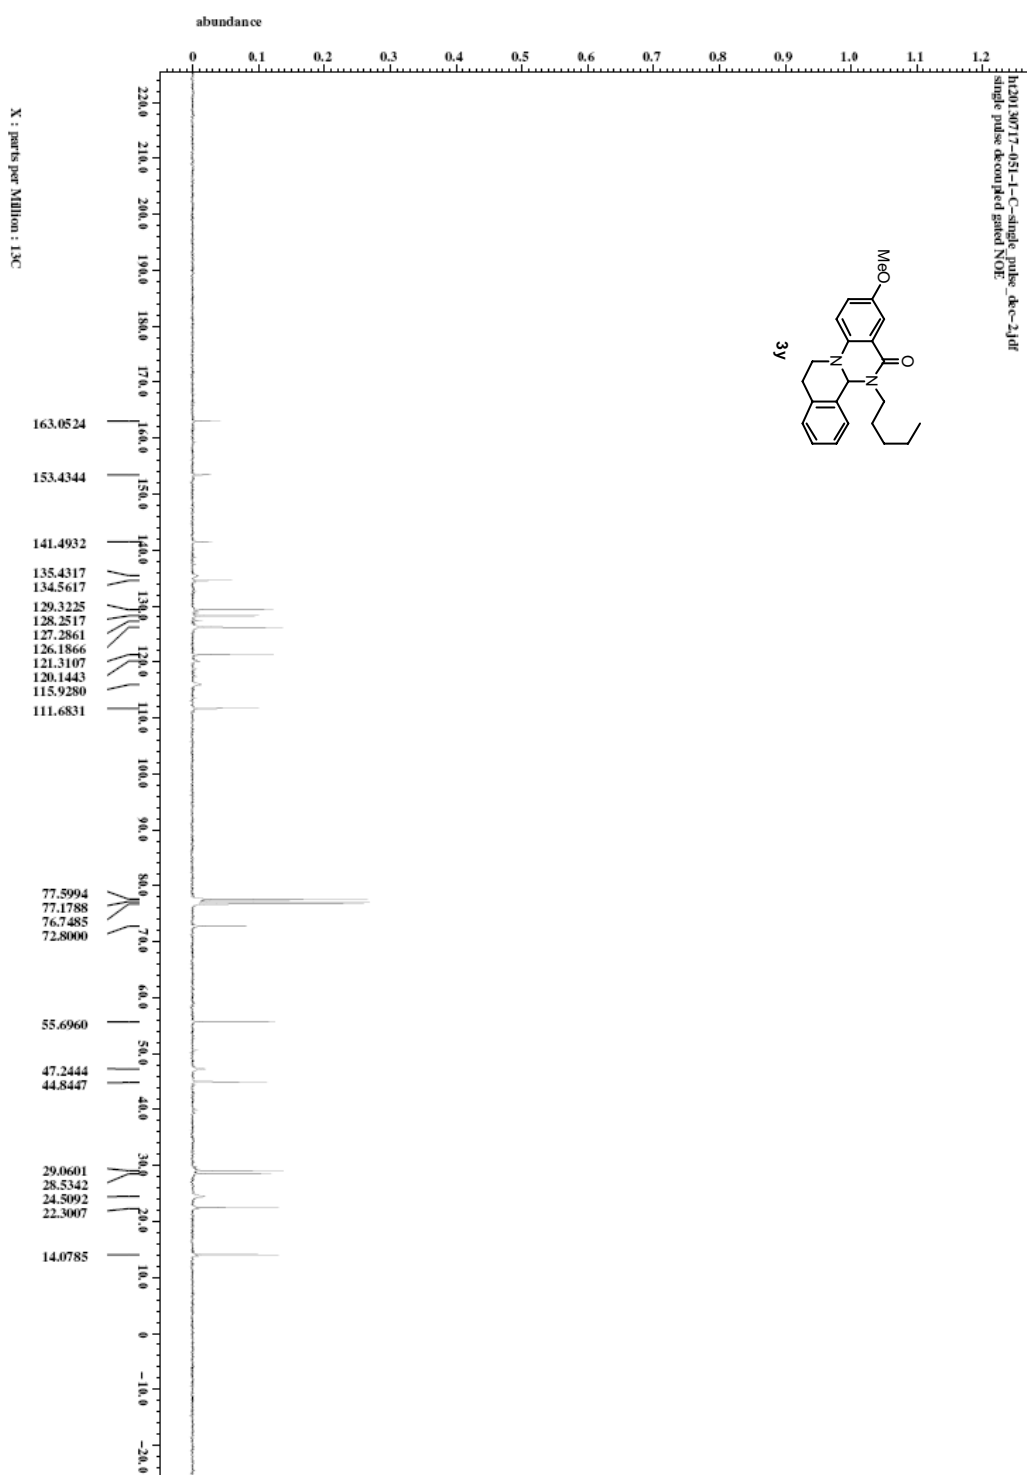

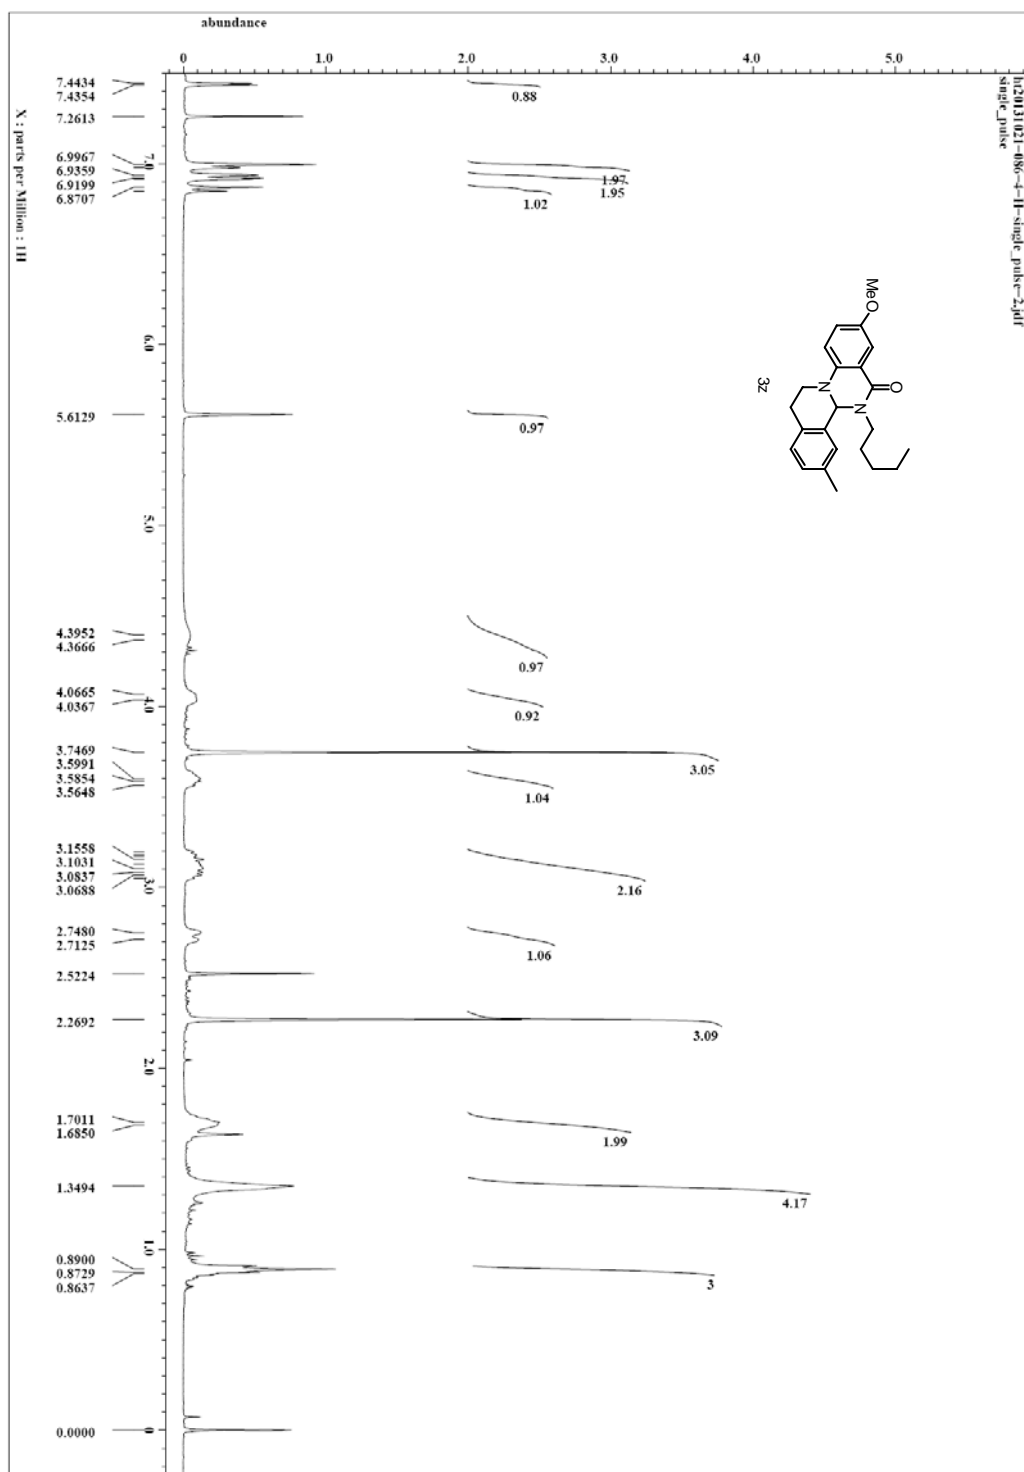

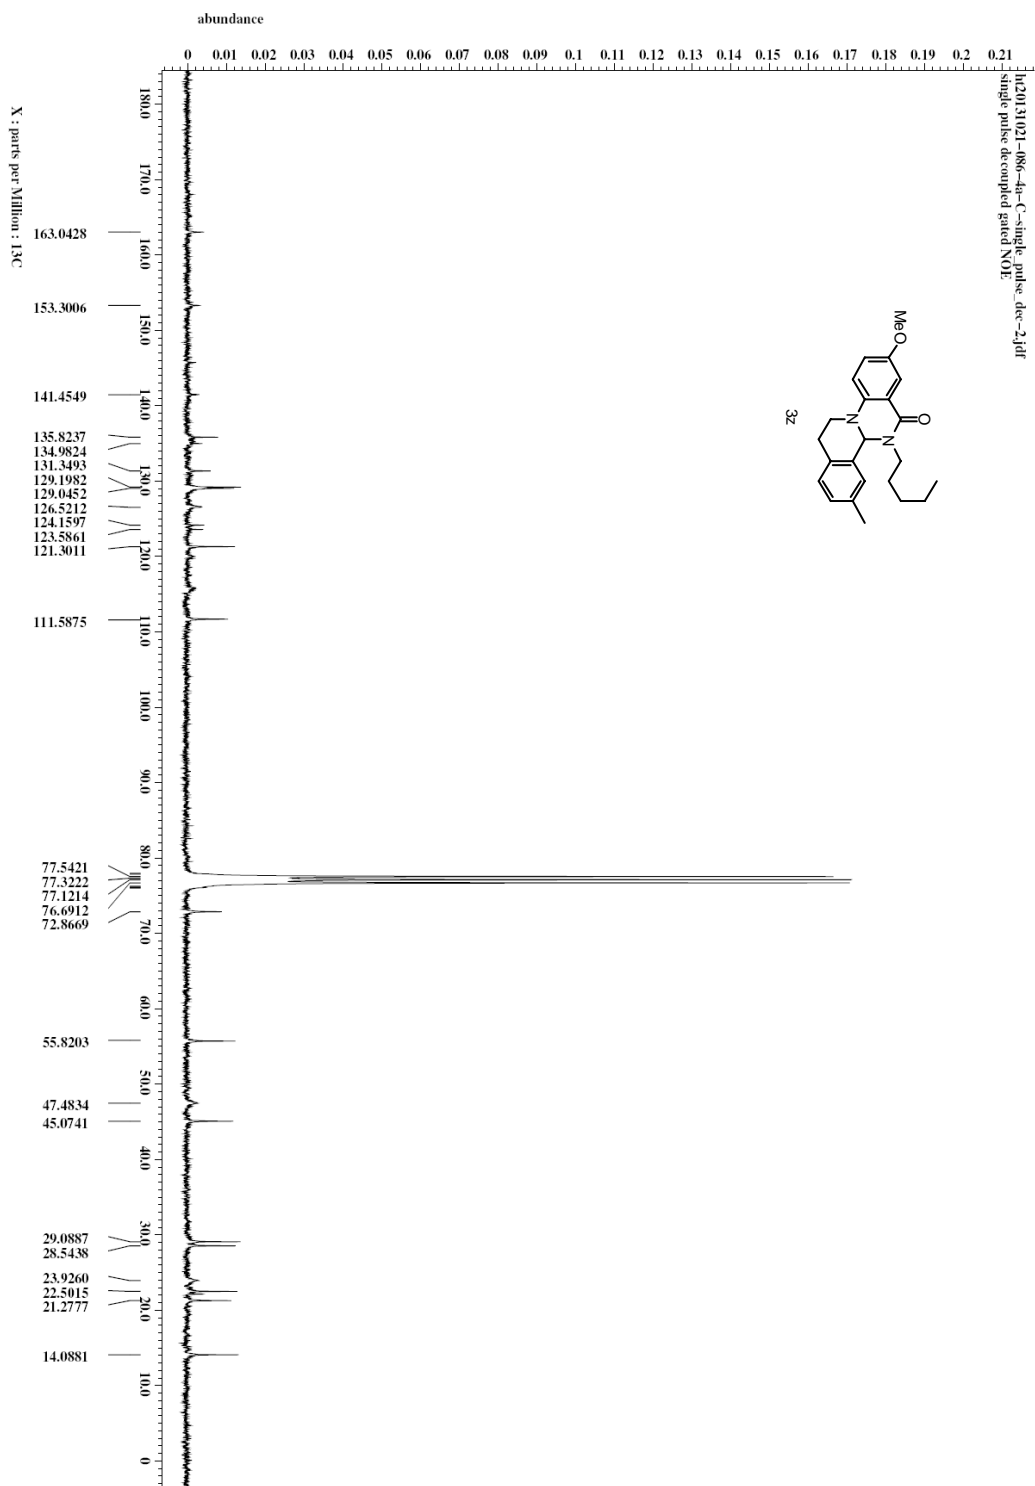

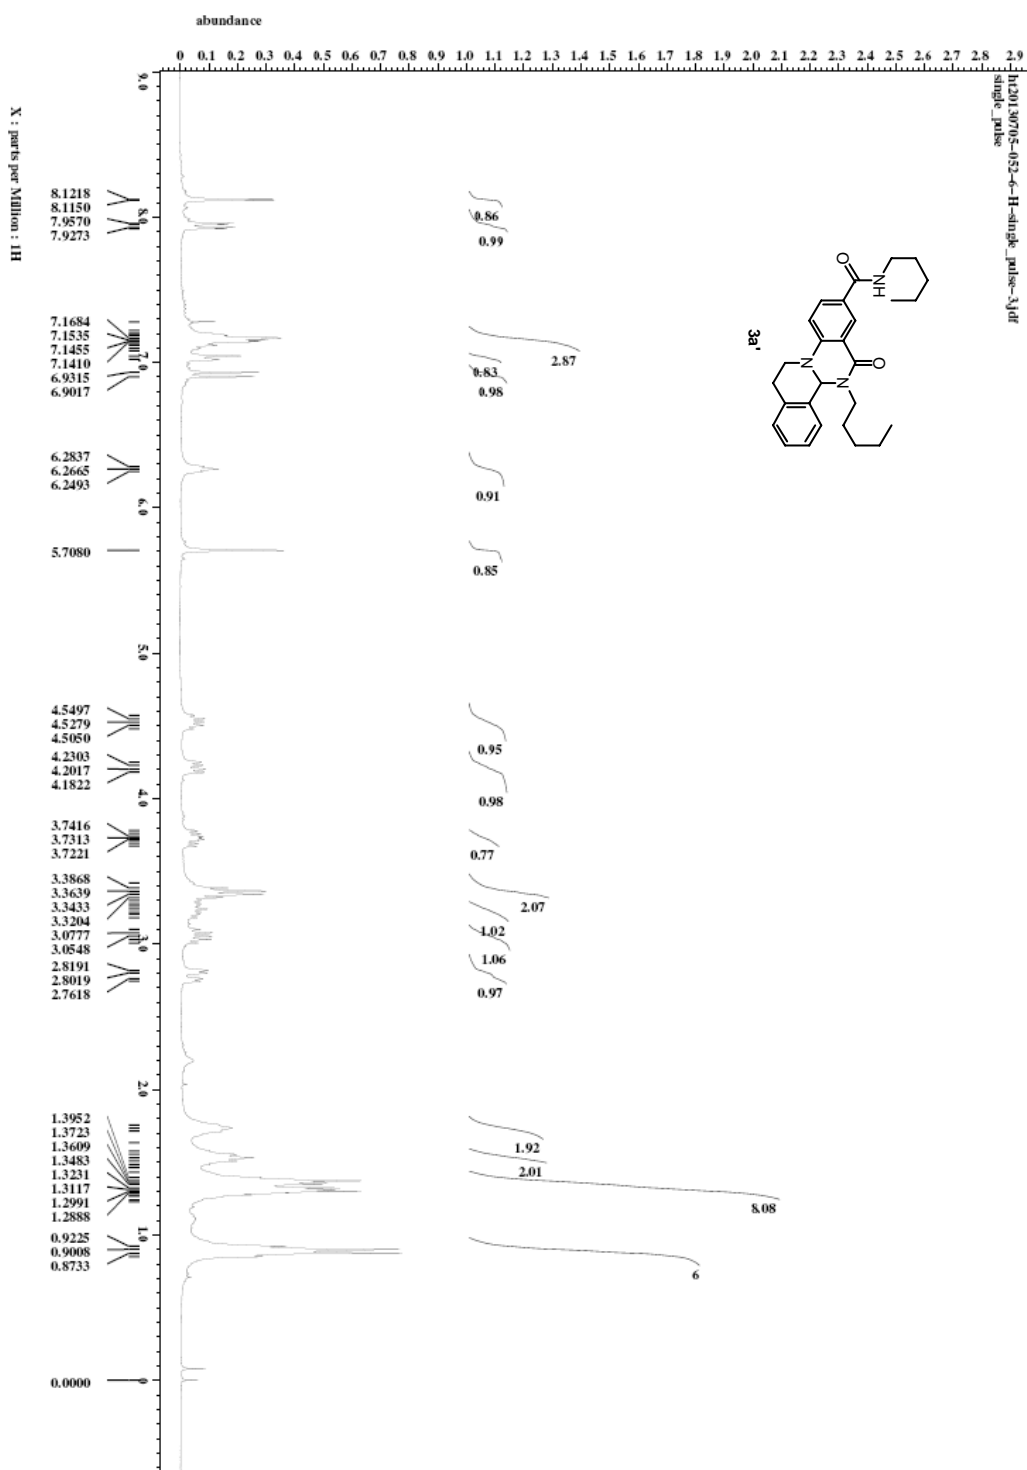

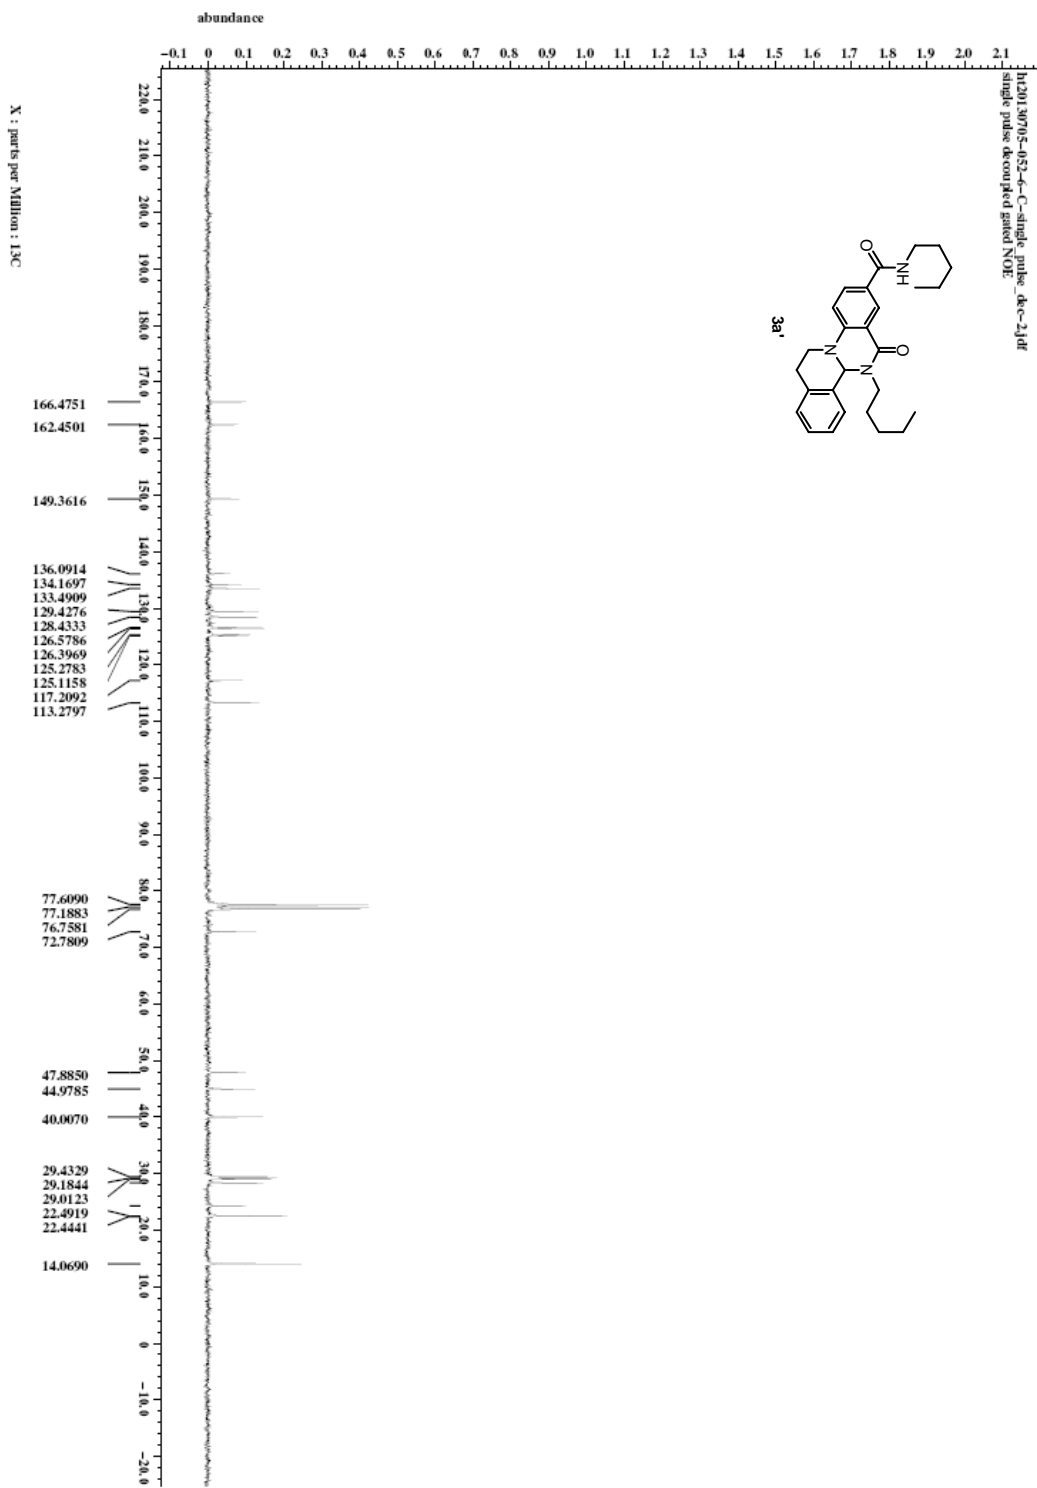

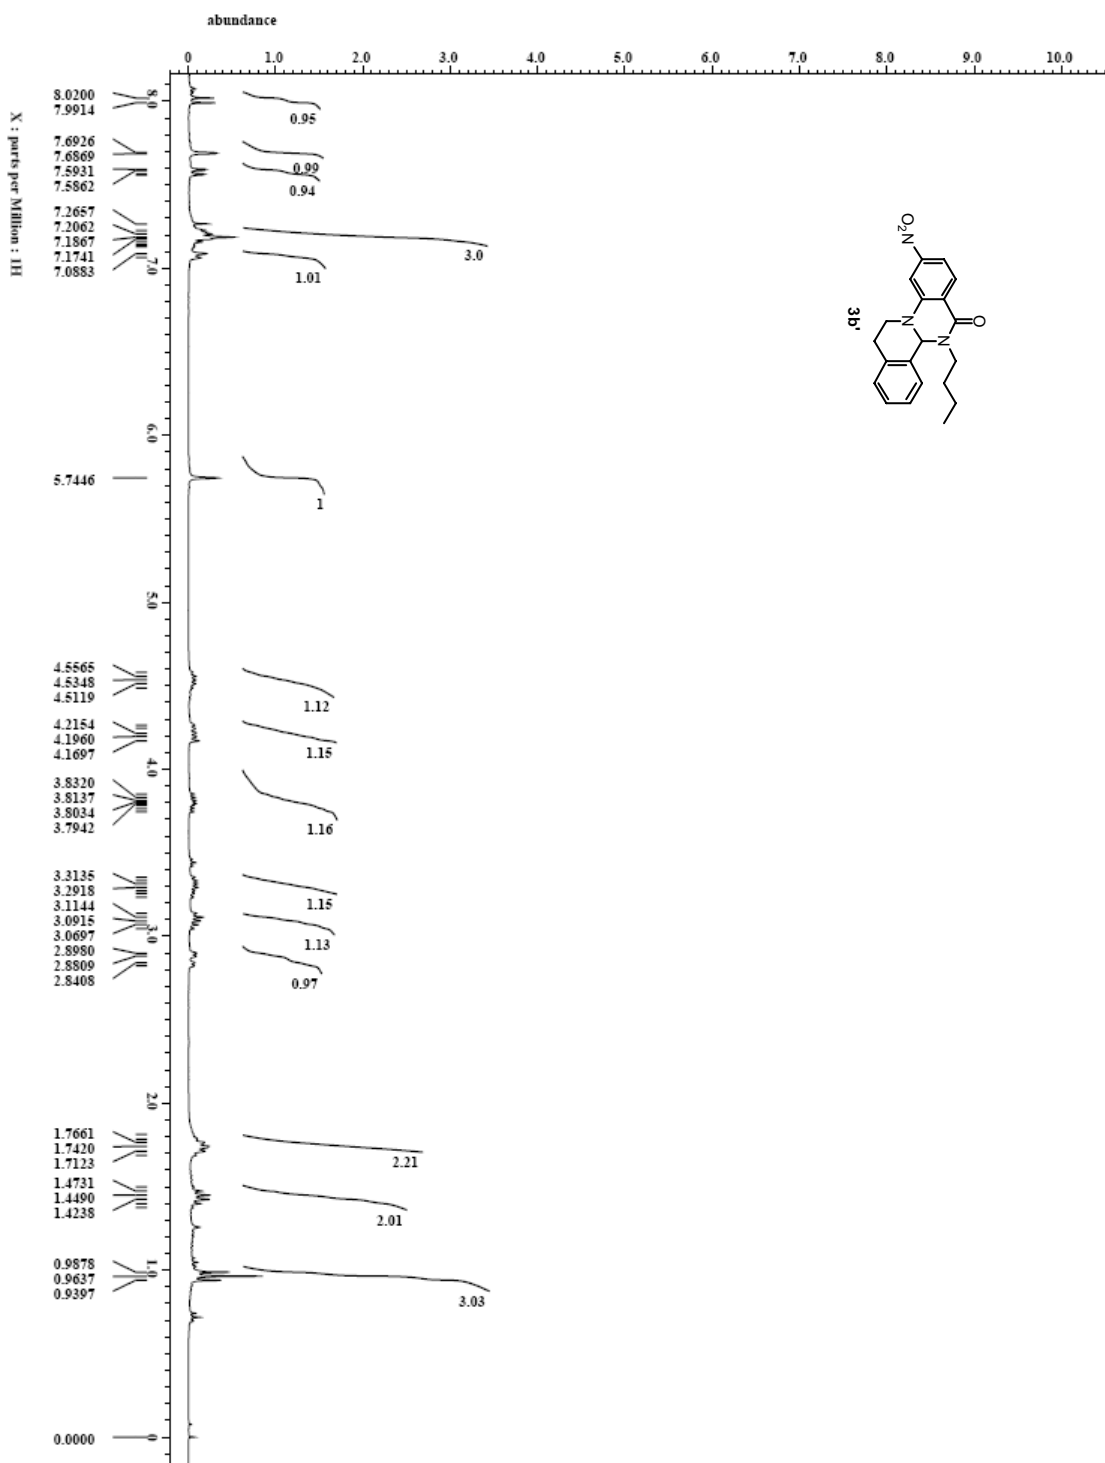



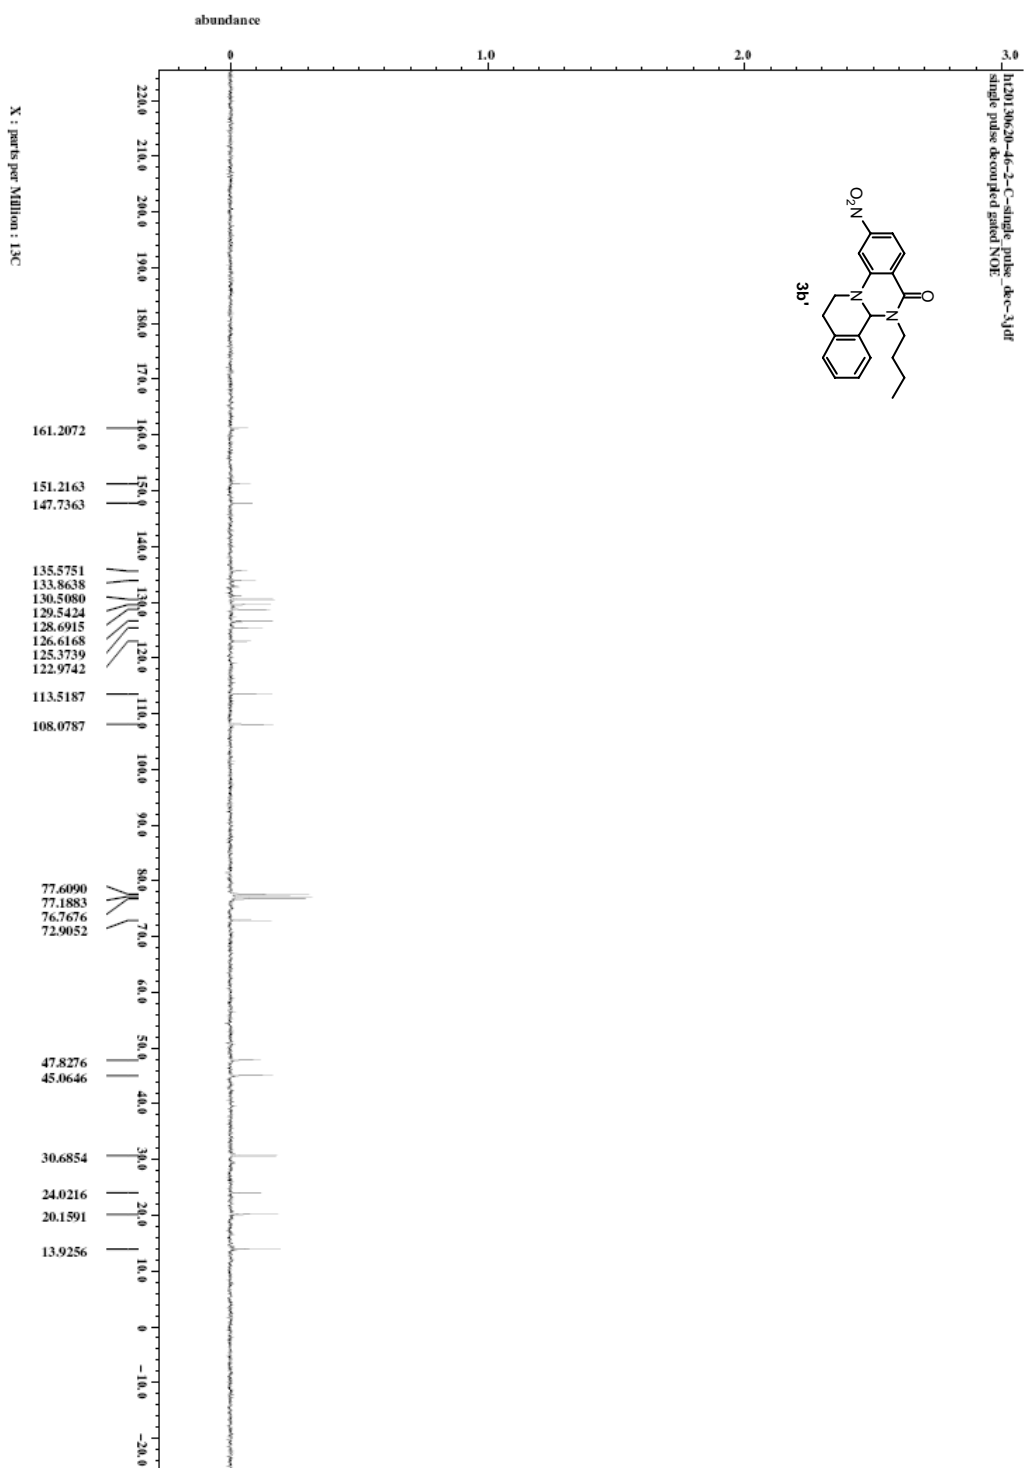

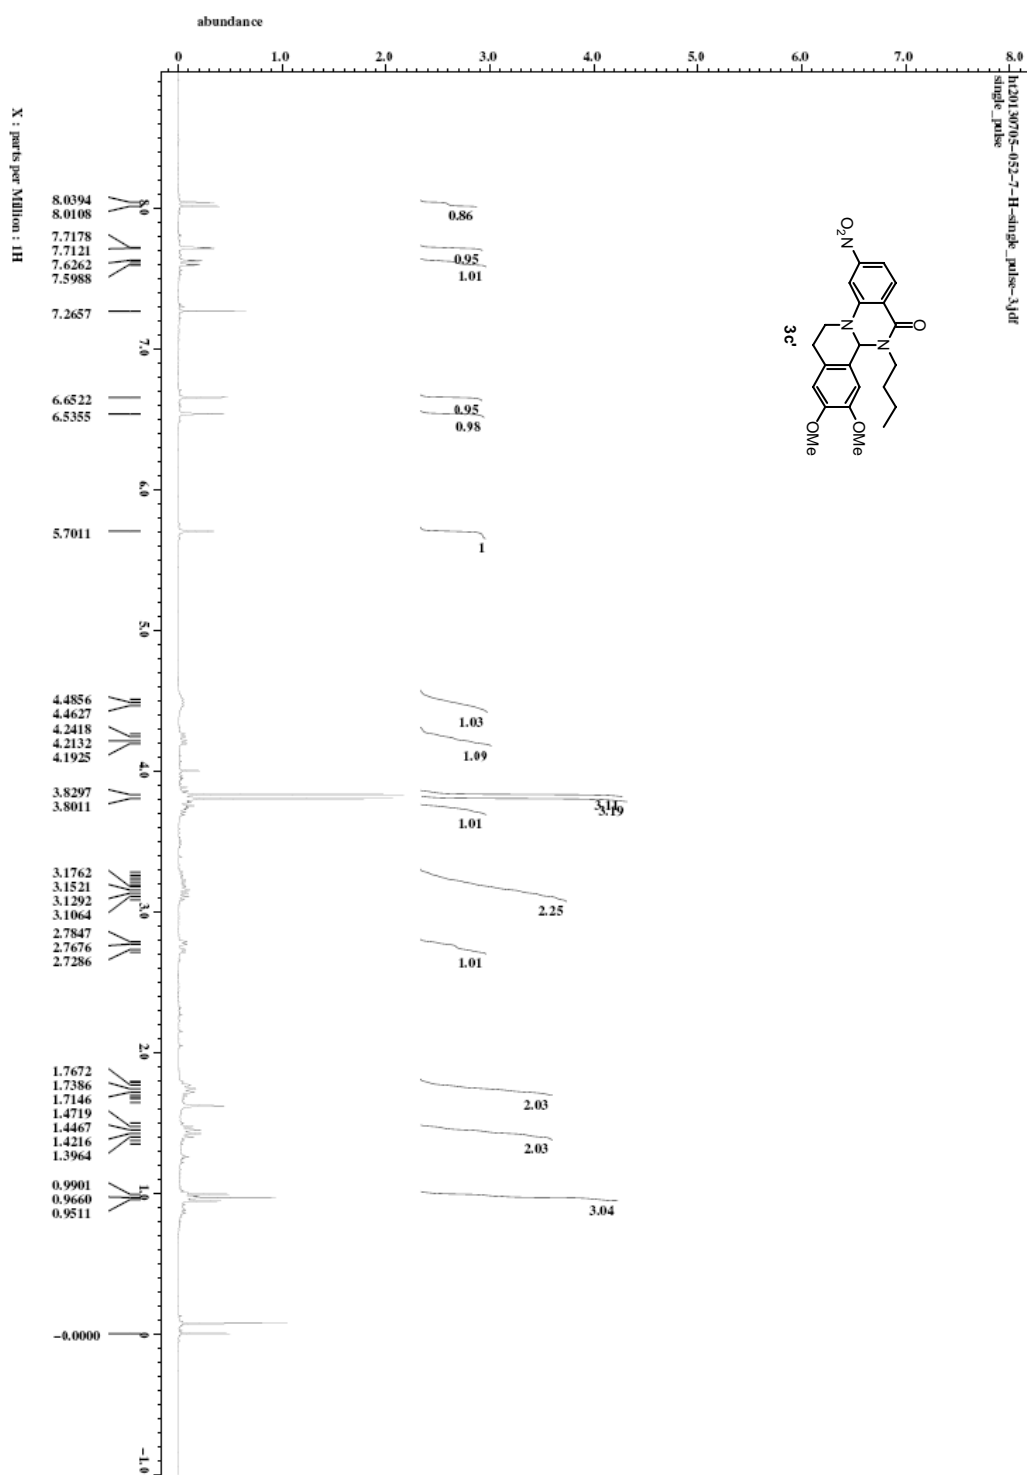

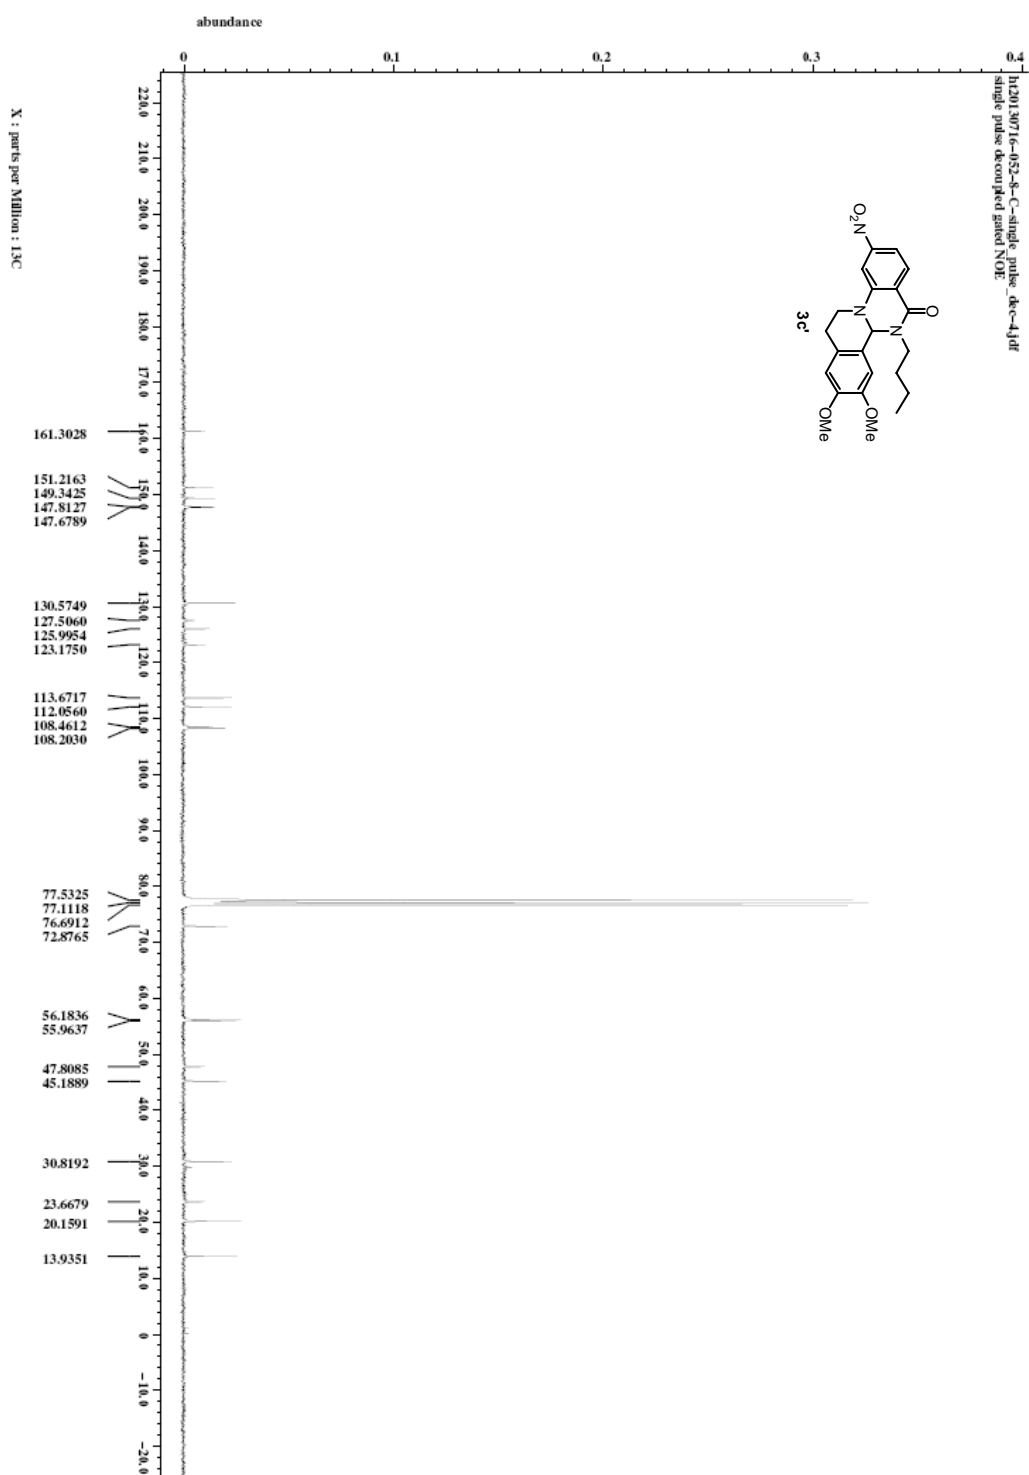

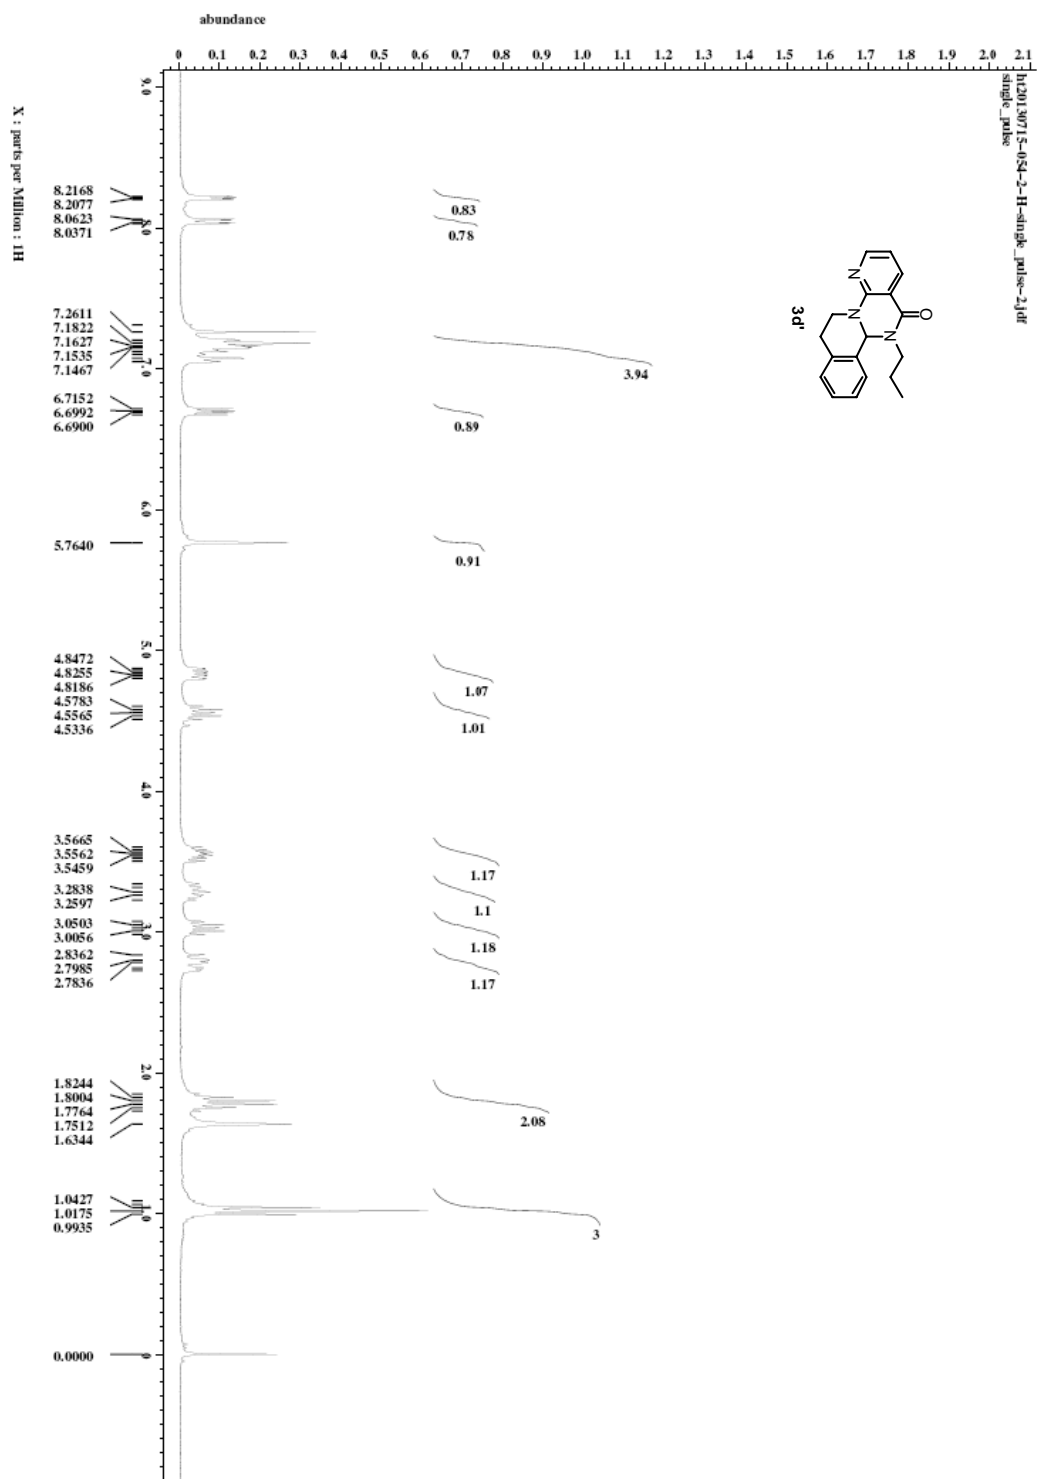

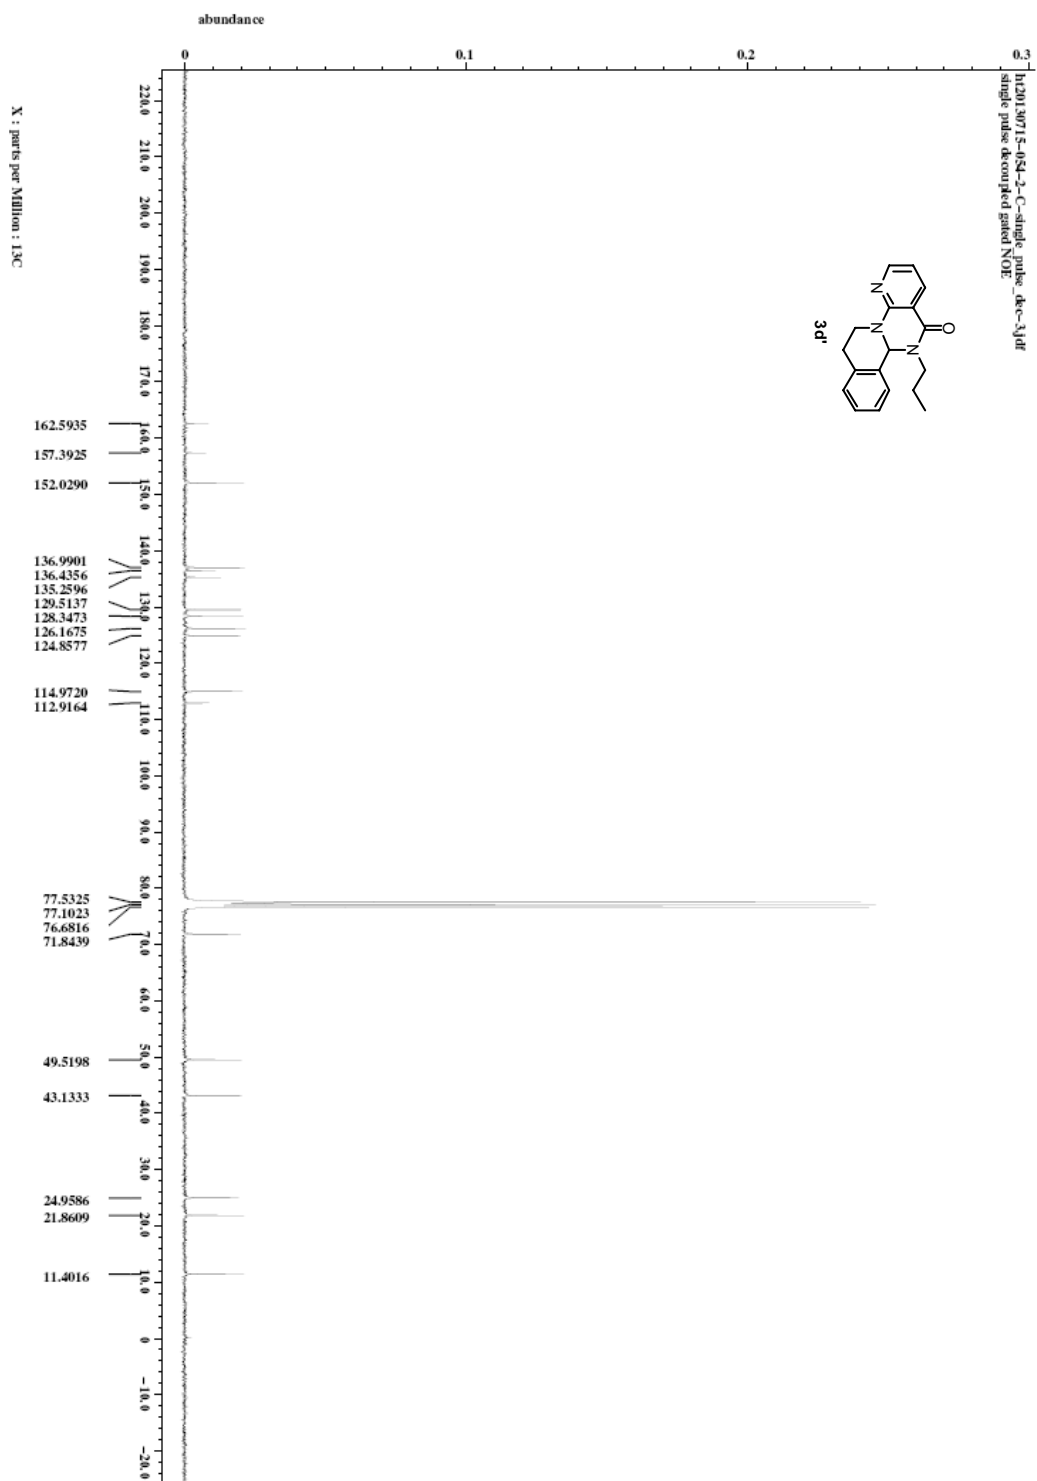

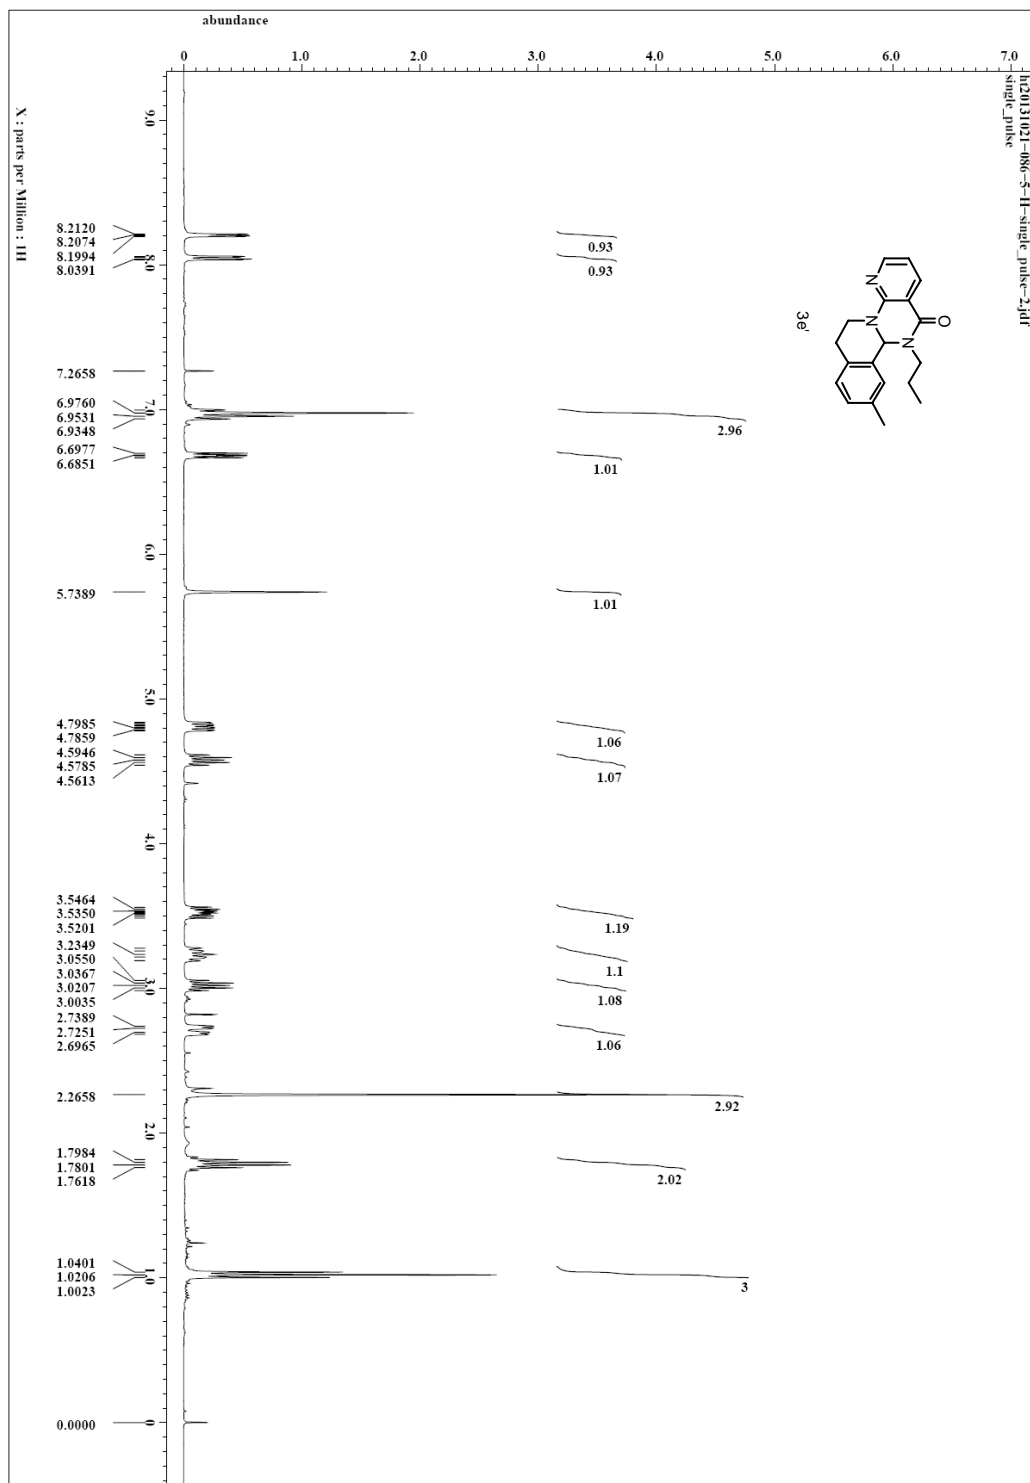

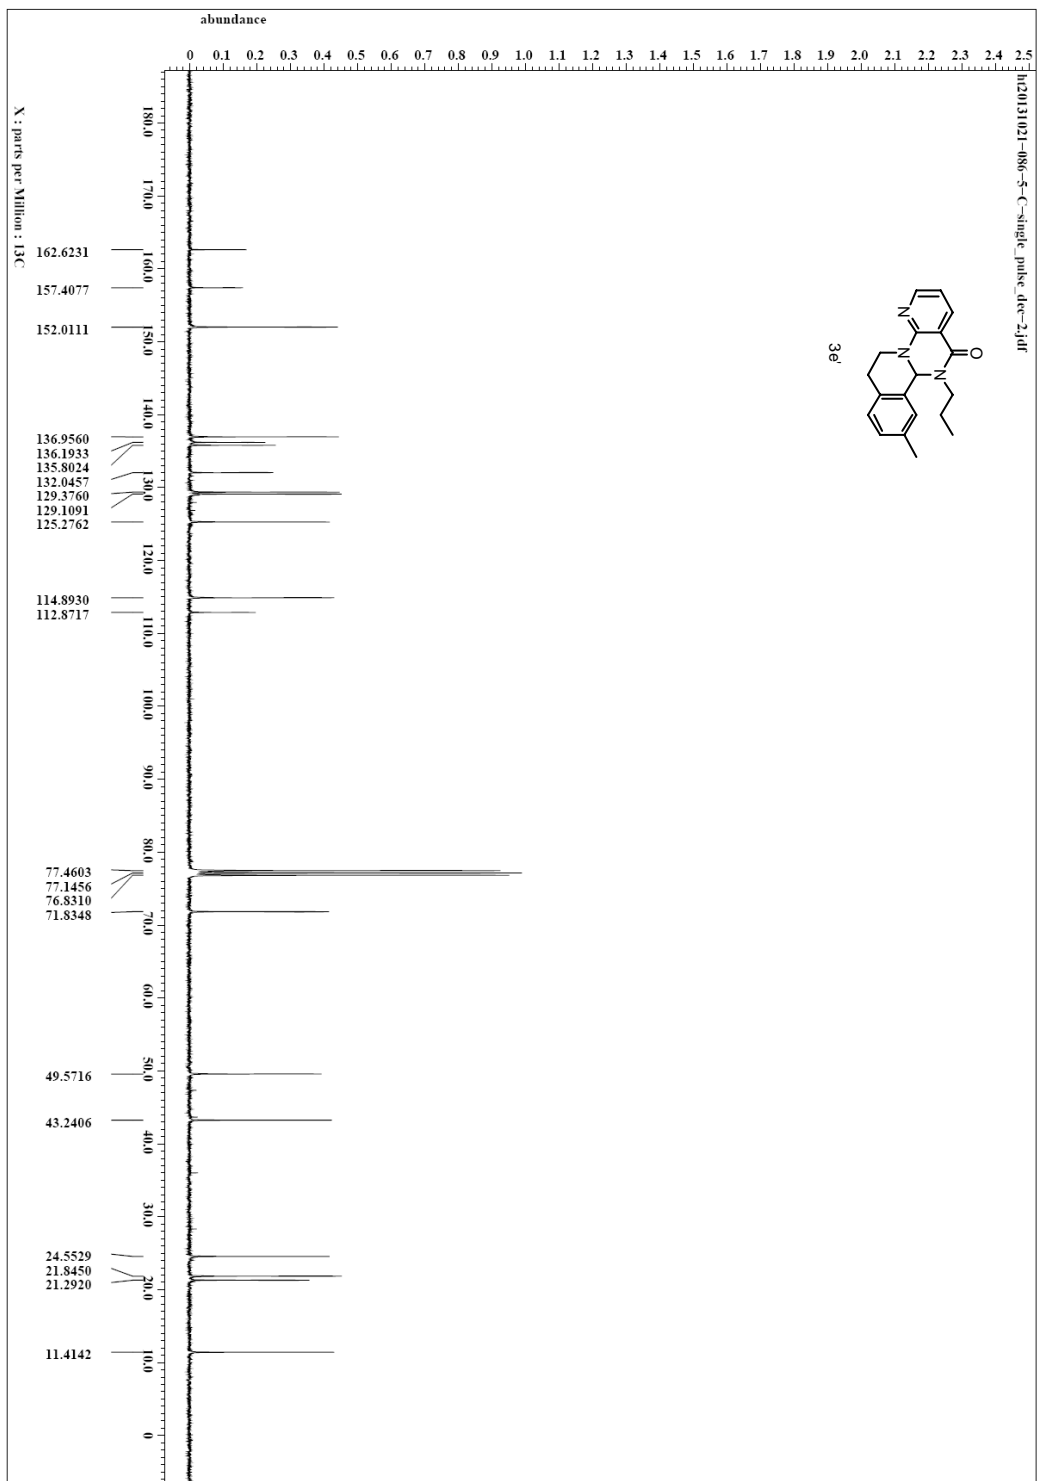

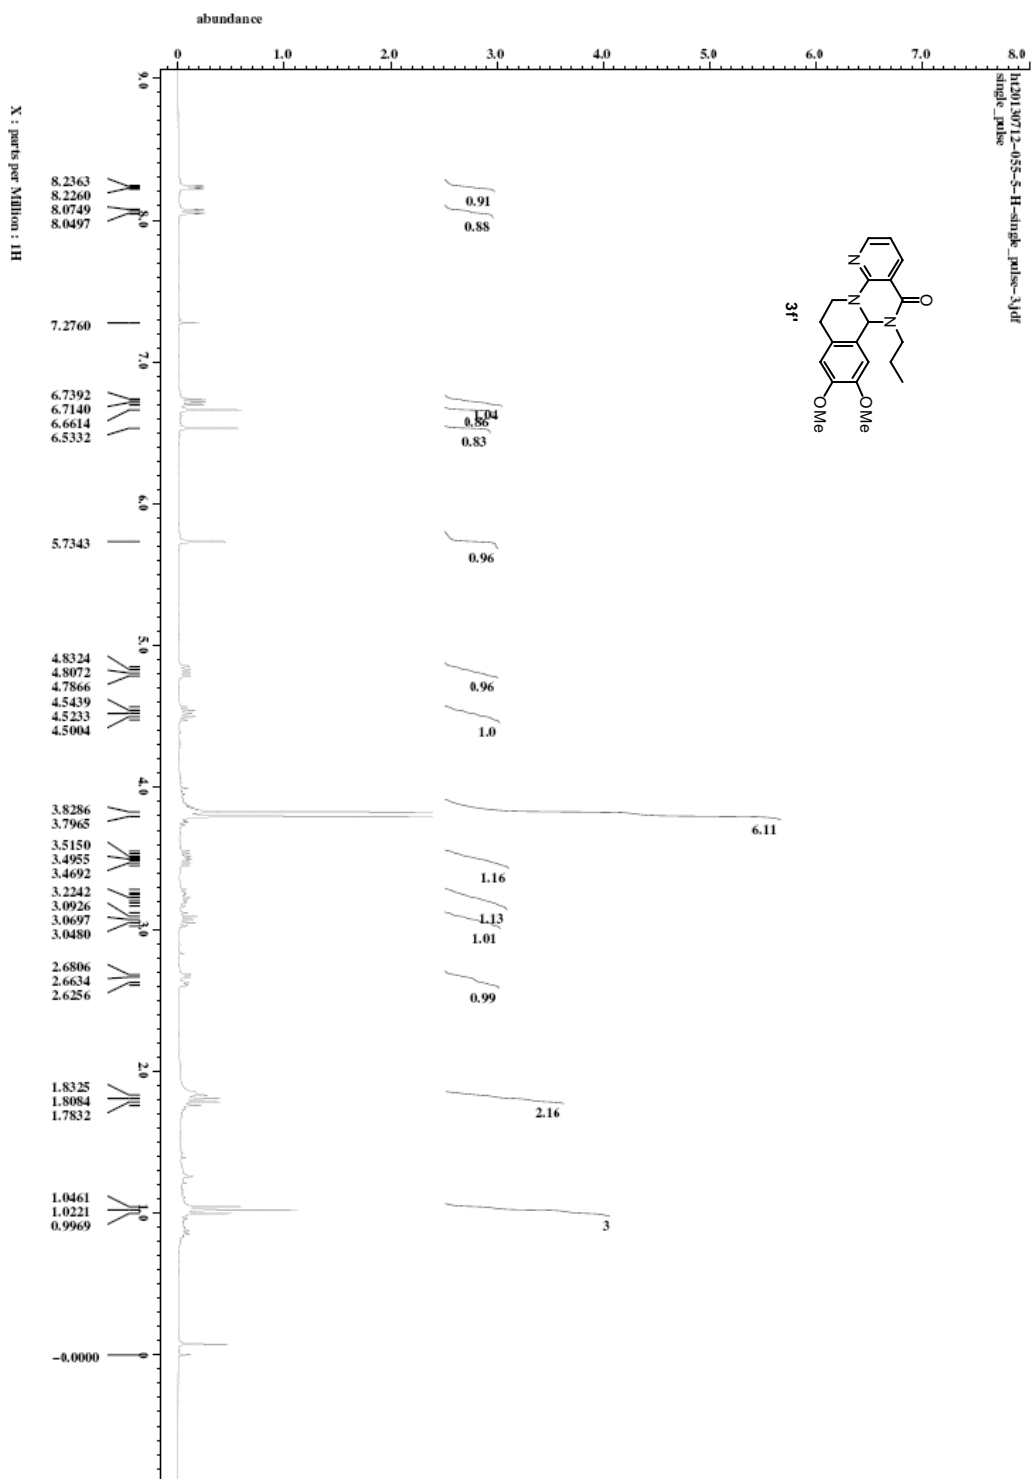



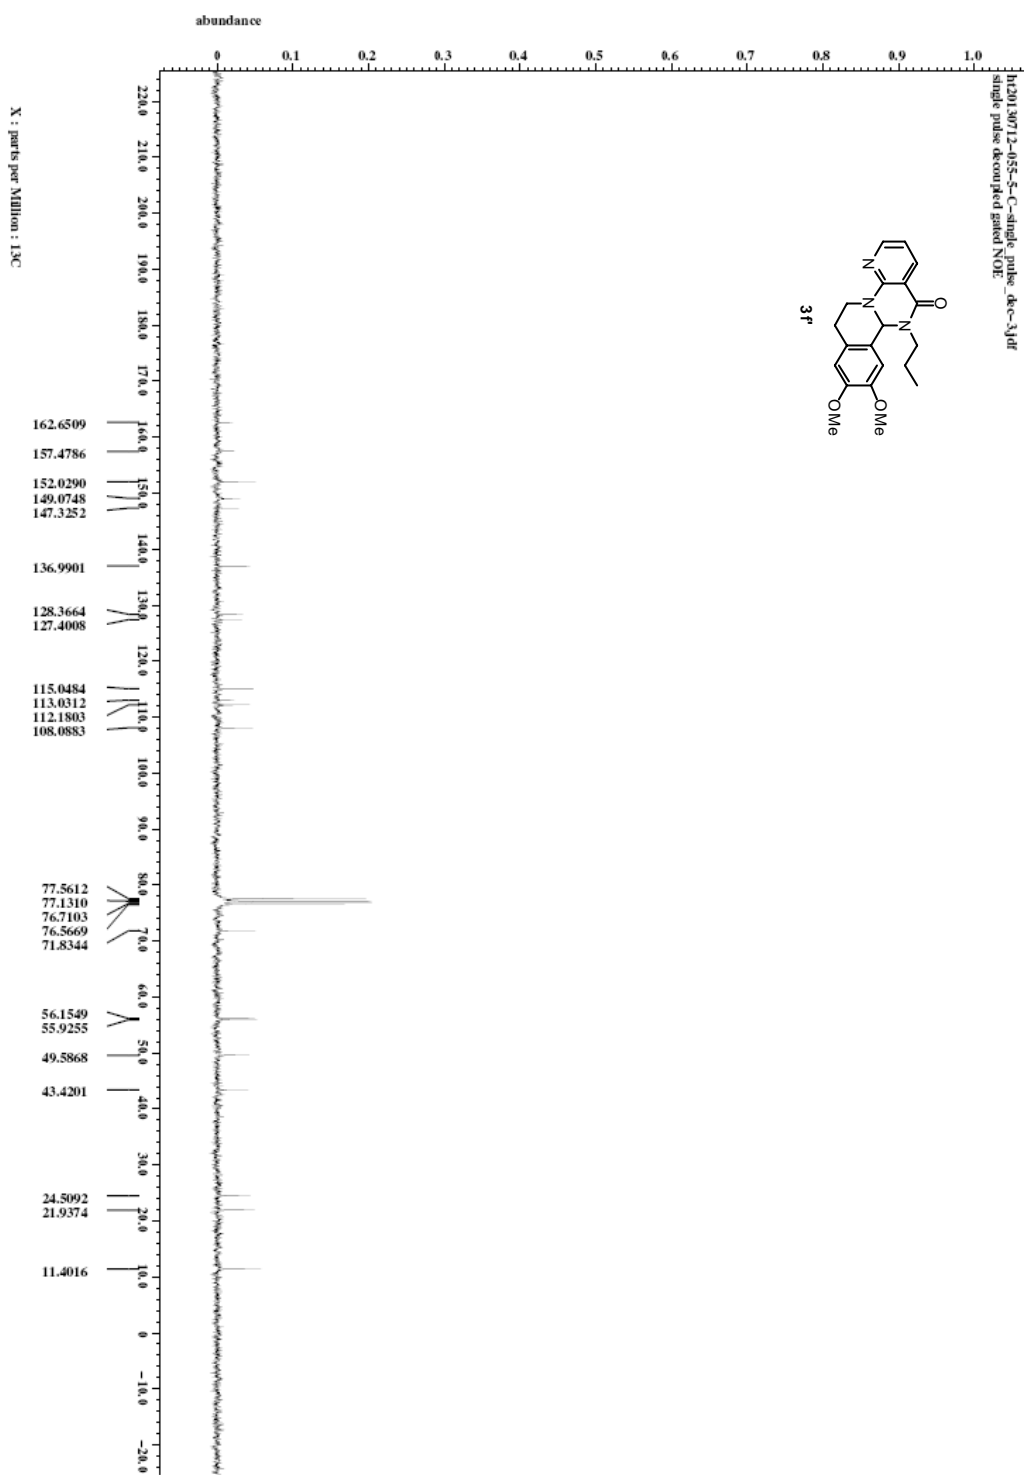

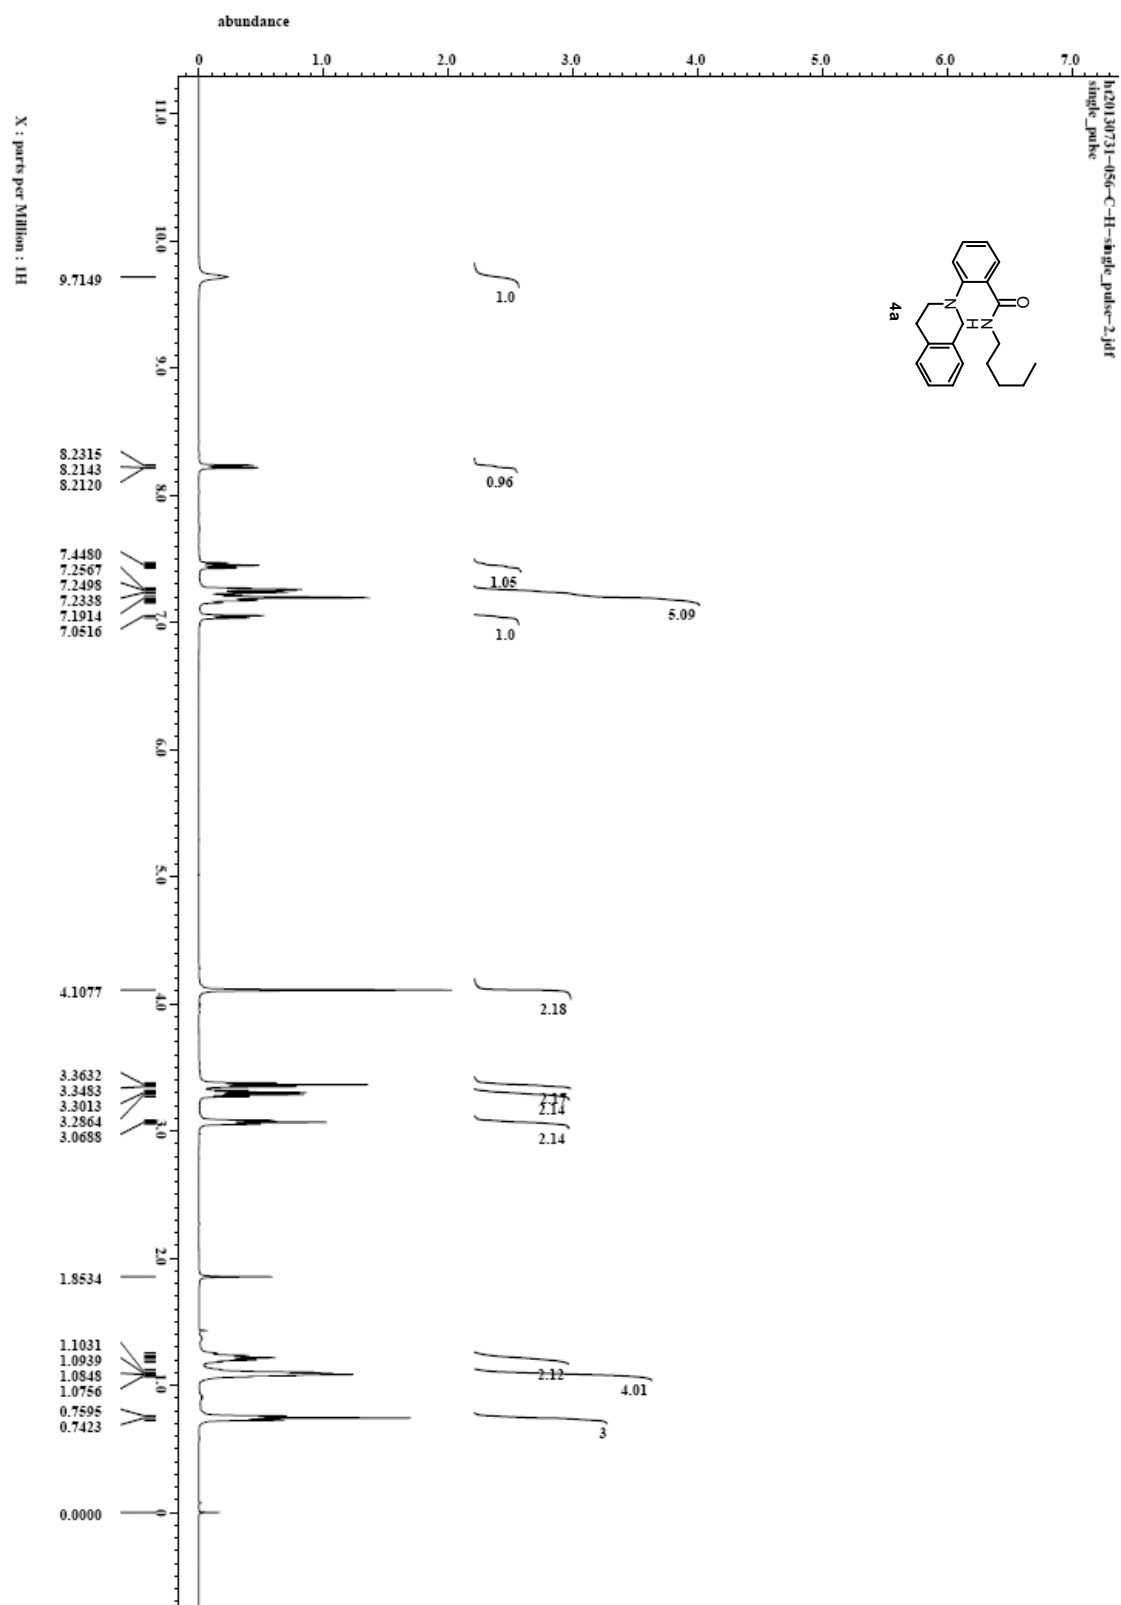

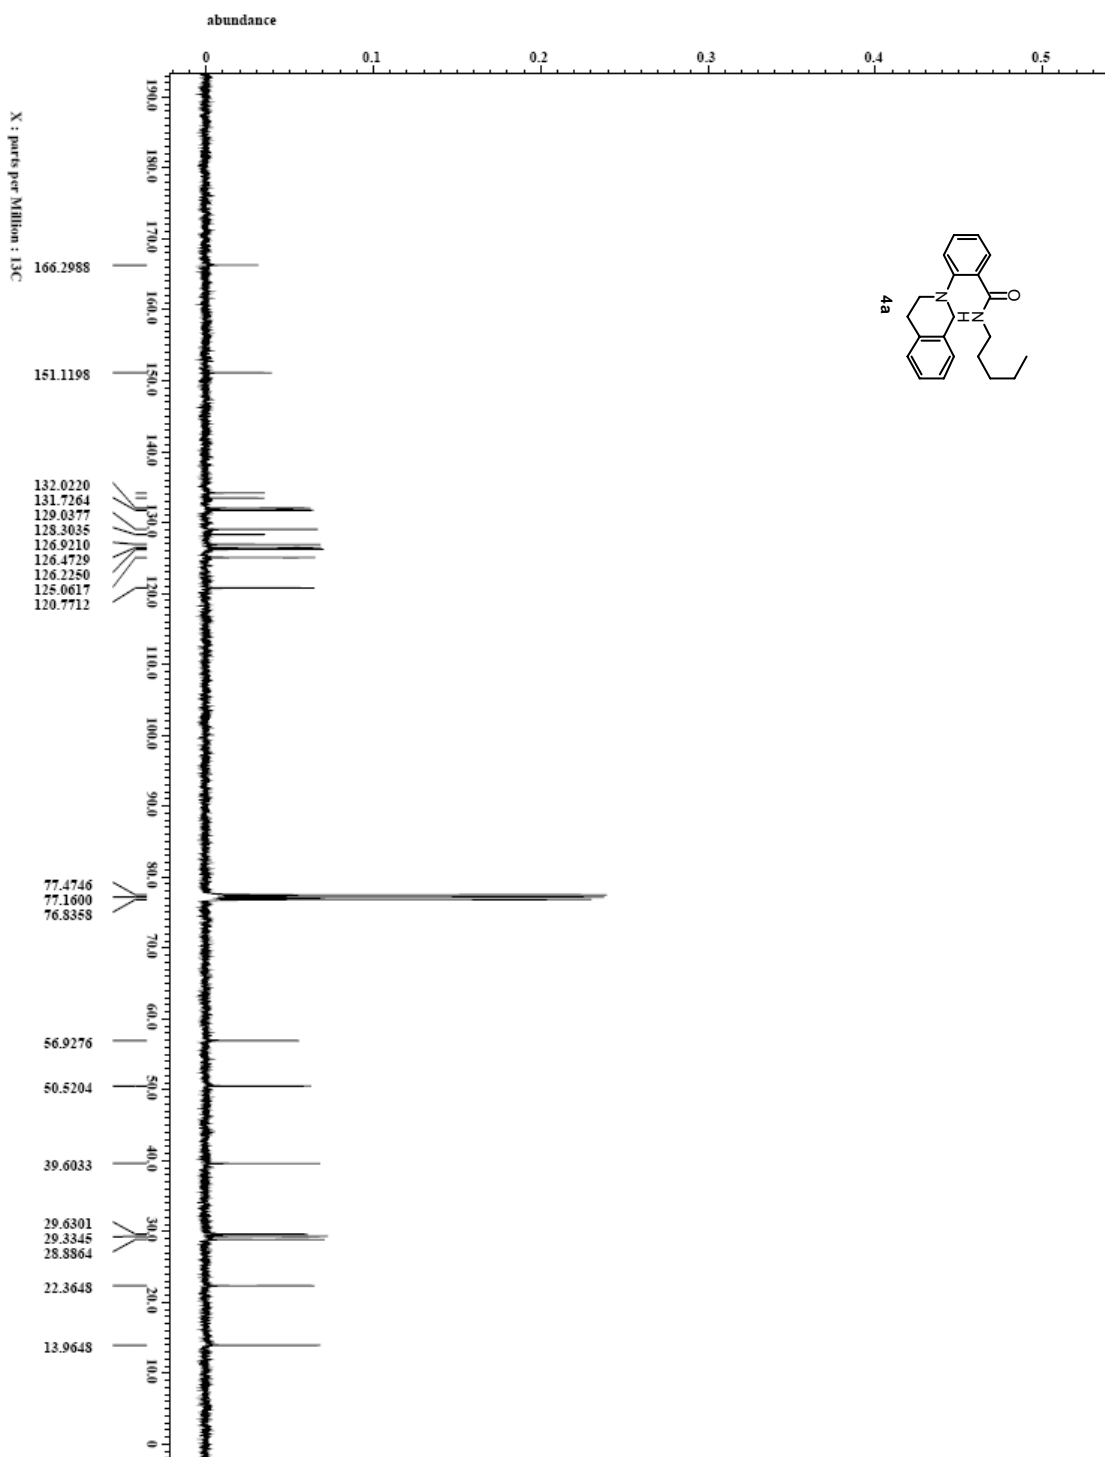

Supplement: c3ra44975k.pdf [file c3ra44975k.pdf]
